# Supplementary material for: Comparative efficacy and safety of alternative glucocorticoids regimens in patients with ANCA-associated vasculitis: a systematic review
Source: PubMed Central journal article supplement — BMJ Open. 2022 Feb 25;12(2):e050507. doi: 10.1136/bmjopen-2021-050507 (PMC8883216; doi:10.1136/bmjopen-2021-050507), 2022-02-25
Supplement: bmjopen-2021-050507.draft_revisions.pdf [file bmjopen-2021-050507.draft_revisions.pdf]

# BMJ Open

BMJ Open is committed to open peer review. As part of this commitment we make the peer review history of every article we publish publicly available.

When an article is published we post the peer reviewers' comments and the authors' responses online. We also post the versions of the paper that were used during peer review. These are the versions that the peer review comments apply to.

The versions of the paper that follow are the versions that were submitted during the peer review process. They are not the versions of record or the final published versions. They should not be cited or distributed as the published version of this manuscript.

BMJ Open is an open access journal and the full, final, typeset and author-corrected version of record of the manuscript is available on our site with no access controls, subscription charges or pay-per-view fees (<http://bmjopen.bmj.com>).

If you have any questions on BMJ Open's open peer review process please email [info.bmjopen@bmj.com](mailto:info.bmjopen@bmj.com)

# BMJ Open

## The comparative efficacy and safety of alternative glucocorticoids regimens in patients with ANCA-associated vasculitis: A systematic review

|                               |                                                                                                                                                                                                                                                                                                                                                                                                                                                                                                                                                                                                                                                                                                                                                                                                                                                                                                                                                                                                                                                                                                                                                                                                                                                                                                                                                                                                                                                                                                                                                                                                                                                                                                                    |
|-------------------------------|--------------------------------------------------------------------------------------------------------------------------------------------------------------------------------------------------------------------------------------------------------------------------------------------------------------------------------------------------------------------------------------------------------------------------------------------------------------------------------------------------------------------------------------------------------------------------------------------------------------------------------------------------------------------------------------------------------------------------------------------------------------------------------------------------------------------------------------------------------------------------------------------------------------------------------------------------------------------------------------------------------------------------------------------------------------------------------------------------------------------------------------------------------------------------------------------------------------------------------------------------------------------------------------------------------------------------------------------------------------------------------------------------------------------------------------------------------------------------------------------------------------------------------------------------------------------------------------------------------------------------------------------------------------------------------------------------------------------|
| Journal:                      | <i>BMJ Open</i>                                                                                                                                                                                                                                                                                                                                                                                                                                                                                                                                                                                                                                                                                                                                                                                                                                                                                                                                                                                                                                                                                                                                                                                                                                                                                                                                                                                                                                                                                                                                                                                                                                                                                                    |
| Manuscript ID                 | bmjopen-2021-050507                                                                                                                                                                                                                                                                                                                                                                                                                                                                                                                                                                                                                                                                                                                                                                                                                                                                                                                                                                                                                                                                                                                                                                                                                                                                                                                                                                                                                                                                                                                                                                                                                                                                                                |
| Article Type:                 | Original research                                                                                                                                                                                                                                                                                                                                                                                                                                                                                                                                                                                                                                                                                                                                                                                                                                                                                                                                                                                                                                                                                                                                                                                                                                                                                                                                                                                                                                                                                                                                                                                                                                                                                                  |
| Date Submitted by the Author: | 23-Feb-2021                                                                                                                                                                                                                                                                                                                                                                                                                                                                                                                                                                                                                                                                                                                                                                                                                                                                                                                                                                                                                                                                                                                                                                                                                                                                                                                                                                                                                                                                                                                                                                                                                                                                                                        |
| Complete List of Authors:     | <p>xiao, yingqi; McMaster University, Department of Health Research Methods, Evidence and Impact; Sichuan University, West China School of Nursing / Department of Nursing, West China Hospital</p> <p>Guyatt, Gordon; McMaster University, Department of Health Research Methods, Evidence and Impact; McMaster University, Department of Medicine</p> <p>Zeng, Linan; McMaster University, Department of Health Research Methods, Evidence, and Impact; Sichuan University, Pharmacy Department/Evidence-based Pharmacy Center, West China Second University Hospital</p> <p>Jayne, David; University of Cambridge, Department of Medicine</p> <p>Merkel, PA; University of Pennsylvania, Division of Rheumatology, Department of Medicine and Division of Clinical Epidemiology, Department of Biostatistics, Epidemiology and Informatics</p> <p>Siemieniuk, Reed; McMaster University, Department of Health Research Methods, Evidence, and Impact; McMaster University, Ontario, Canada., Department of Medicine</p> <p>Dookie, Jared E ; Western University, Schulich School of Medicine and Dentistry</p> <p>A Buchan, Tayler ; McMaster University, Department of Health Research Methods, Evidence and Impact</p> <p>Ahmed, Muhammad Muneeb; McMaster University, Hamilton, Ontario, Canada., Michael G. DeGroote School of Medicine</p> <p>Couban, Rachel; McMaster University, DeGroote Institute for Pain Research and Care</p> <p>Mahr, Alfred ; Kantonsspital St Gallen, St Gallen, Switzerland., Clinic for Rheumatology</p> <p>Walsh, Michael; McMaster University, Department of Health Research Methods, Evidence and Impact; McMaster University, Ontario, Canada., Department of Medicine</p> |
| Keywords:                     | HAEMATOLOGY, ORAL MEDICINE, Clinical trials < THERAPEUTICS                                                                                                                                                                                                                                                                                                                                                                                                                                                                                                                                                                                                                                                                                                                                                                                                                                                                                                                                                                                                                                                                                                                                                                                                                                                                                                                                                                                                                                                                                                                                                                                                                                                         |

SCHOLARONE™  
Manuscripts

1  
2  
3  
4  
5  
6  
7  
8  
9  
10  
11  
12  
13  
14  
15  
16  
17  
18  
19  
20  
21  
22  
23  
24  
25  
26  
27  
28  
29  
30  
31  
32  
33  
34  
35  
36  
37  
38  
39  
40  
41  
42  
43  
44  
45  
46  
47  
48  
49  
50  
51  
52  
53  
54  
55  
56  
57  
58  
59  
60

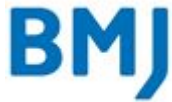

I, the Submitting Author has the right to grant and does grant on behalf of all authors of the Work (as defined in the below author licence), an exclusive licence and/or a non-exclusive licence for contributions from authors who are: i) UK Crown employees; ii) where BMJ has agreed a CC-BY licence shall apply, and/or iii) in accordance with the terms applicable for US Federal Government officers or employees acting as part of their official duties; on a worldwide, perpetual, irrevocable, royalty-free basis to BMJ Publishing Group Ltd ("BMJ") its licensees and where the relevant Journal is co-owned by BMJ to the co-owners of the Journal, to publish the Work in this journal and any other BMJ products and to exploit all rights, as set out in our [licence](#).

The Submitting Author accepts and understands that any supply made under these terms is made by BMJ to the Submitting Author unless you are acting as an employee on behalf of your employer or a postgraduate student of an affiliated institution which is paying any applicable article publishing charge ("APC") for Open Access articles. Where the Submitting Author wishes to make the Work available on an Open Access basis (and intends to pay the relevant APC), the terms of reuse of such Open Access shall be governed by a Creative Commons licence – details of these licences and which [Creative Commons](#) licence will apply to this Work are set out in our licence referred to above.

Other than as permitted in any relevant BMJ Author's Self Archiving Policies, I confirm this Work has not been accepted for publication elsewhere, is not being considered for publication elsewhere and does not duplicate material already published. I confirm all authors consent to publication of this Work and authorise the granting of this licence.

1  
2  
3 **The comparative efficacy and safety of alternative glucocorticoids regimens in**  
4 **patients with ANCA-associated vasculitis: A systematic review**  
5

6  
7 Yingqi Xiao<sup>1,2</sup>, PhD, reviewer, methodologist, Gordon H Guyatt<sup>1,3</sup>, MD, professor,  
8 methodologist, Linan Zeng<sup>1,4</sup>, PhD, methodologist, David RW Jayne<sup>5</sup>, MD,  
9 nephrologist, Peter A Merkel<sup>6</sup>, MD, MPH, rheumatologist, Reed AC Siemieniuk<sup>1,3</sup>,  
10 MD, methodologist, Jared E Dookie<sup>7</sup>, B.Sc, MD, reviewer, Tayler A Buchan<sup>1</sup>, MSc,  
11 reviewer, Muhammad M Ahmed<sup>8</sup>, BHSc, MD, reviewer, Rachel J Couban<sup>9</sup>,  
12 information specialist, Alfred Mahr<sup>10</sup>, MD, rheumatologist, Michael Walsh<sup>1,3,11</sup>, MD,  
13 nephrologist  
14  
15  
16  
17  
18  
19

20 1 Department of Health Research Methods, Evidence and Impact, McMaster  
21 University, Ontario, Canada.  
22

23  
24 2 West China School of Nursing / Department of Nursing, West China Hospital,  
25 Sichuan University, China.  
26

27  
28 3 Department of Medicine, McMaster University, Ontario, Canada.  
29

30  
31 4 Pharmacy Department/Evidence-based Pharmacy Center, West China Second  
32 University Hospital, Sichuan University, China.  
33

34  
35 5 Department of Medicine, University of Cambridge, Cambridge, United Kingdom.  
36

37  
38 6 Division of Rheumatology, Department of Medicine and Division of Clinical  
39 Epidemiology, Department of Biostatistics, Epidemiology and Informatics, University  
40 of Pennsylvania, Philadelphia, USA.  
41

42  
43 7 Schulich School of Medicine and Dentistry, Western University, Ontario, Canada.  
44

45  
46 8 Michael G. DeGroote School of Medicine, McMaster University, Hamilton,  
47 Ontario, Canada.  
48

49  
50 9 DeGroote Institute for Pain Research and Care, McMaster University, Ontario,  
51 Canada.  
52

53  
54 10 Clinic for Rheumatology, Kantonsspital St Gallen, St Gallen, Switzerland.  
55

56  
57 11 Population Health Research Institute, Hamilton Health Sciences / McMaster  
58 University, Ontario, Canada.  
59

60 Corresponding Author:

1  
2  
3 Yingqi Xiao  
4

5 West China School of Nursing  
6

7 West China Hospital  
8

9 Sichuan University  
10

11 Chengdu, Sichuan, China  
12

13 610041  
14

15 Email: xiaoyingqixyq@163.com  
16  
17  
18  
19  
20  
21  
22  
23  
24  
25  
26  
27  
28  
29  
30  
31  
32  
33  
34  
35  
36  
37  
38  
39  
40  
41  
42  
43  
44  
45  
46  
47  
48  
49  
50  
51  
52  
53  
54  
55  
56  
57  
58  
59  
60

## Abstract

### Objective

To compare the efficacy and safety of alternative glucocorticoids (GC) regimens as induction therapy for patients with ANCA-associated vasculitis.

### Design

Systematic review of RCTs.

### Data sources

Medline, Embase, Clinicaltrials.gov and Cochrane Central Register of Controlled Trials up to 10 April 2020.

### Study selection and Review methods

RCTs comparing two (or more) different dose regimens of GC in ANCA-associated vasculitis during induction of remission, regardless of other therapies. Pairs of reviewers independently screened records, extracted data and assessed risk of bias. Two reviewers rated certainty of evidence using the GRADE approach.

### Results

Of 3912 records identified, the full texts of only two records met the eligibility criteria, only one of which was completed and provided evidence. The trial compared reduced-dose and standard-dose regimen of GC, which the reduced-dose regimen was as 40% of the cumulative dose in the standard-dose regimen during the first 6 months. Compared with the standard-dose regimen, the reduced-dose regimen of GC may reduce death at the follow-up of longer than 1 year (relative risk: 0.86, 95% CI, 0.6 to 1.24, 21 fewer per 1000, low certainty), while not increase end-stage kidney disease (ESKD) longer than 1 year (relative risk: 1.02, 95% CI, 0.76 to 1.38, 4 more per 1000, moderate certainty). The reduced-dose regimen probably has an important reduction in serious infections at 1 year (relative risk: 0.82, 95% CI, 0.66 to 1.03, 59 fewer per 1000, moderate certainty). And the standard-dose regimen probably result in little or no increase on serious adverse events at follow-up of longer than 1 year (relative risk: 1.05, 95% CI, 0.94 to 1.18, 31 more per 1000, moderate certainty).

### Conclusions

1  
2  
3 The reduced-dose regimen of GC may reduce death at the follow-up of longer than 1  
4 year and serious infections at 1 year while not increase ESKD longer than 1 year.  
5  
6

7 **Systematic review registration**  
8

9 PROSPERO CRD42020179087.  
10  
11

12 **Keywords:** glucocorticoids, Anti-Neutrophil Cytoplasmic Antibody-Associated  
13 Vasculitis, systematic review  
14  
15  
16  
17  
18  
19  
20  
21  
22  
23  
24  
25  
26  
27  
28  
29  
30  
31  
32  
33  
34  
35  
36  
37  
38  
39  
40  
41  
42  
43  
44  
45  
46  
47  
48  
49  
50  
51  
52  
53  
54  
55  
56  
57  
58  
59  
60

For peer review only



### Strengths and limitations of this study

This systematic review used the GRADE approach to assess the quality of evidence.

The included study is the largest global trial on the subject so far which has improved the generalizability of the results through the efforts of national and international vasculitis networks and extensive selection criteria.

Although the included study contained more events than any other trial in this disease, the total statistical information remains low which is particularly obvious for serious adverse events other than serious infection.

Despite the large scale of this study for a rare disease, the degree to which the results can be generalized to patients with non-severe AAV is uncertain, although it is likely safer to extrapolate the safety of the regimen from more severe illness to less severe illness rather than less severe to more severe.

## Introduction

ANCA-associated vasculitis (AAV) comprises a subgroup of systemic vasculitis affecting small- to medium-sized vessels, a chronic inflammatory disease of the blood vessel wall<sup>1</sup>, and includes granulomatosis with polyangiitis, microscopic polyangiitis, and eosinophilic granulomatosis with polyangiitis.<sup>2</sup> Patients with AAV usually test positive for antineutrophil cytoplasmic antibodies (ANCA). The cause of the disease remains unclear, and genetic and environmental factors play an important role in the onset of the disease.<sup>3,4</sup> The annual incidence of AAV is about 20 per million inhabitants, and the prevalence is about 100 per million inhabitants.<sup>5</sup> AAV has multiple clinical manifestations, characterized by leukocytes infiltrating the vessel walls, fibrinoid necrosis, and vascular damage with occlusion or aneurysm formation.<sup>6</sup> The severity of AAV varies greatly, but after months to years of non-severe manifestations, patients with non-severe diseases often progress to severe diseases.<sup>7</sup> The most common severe AAV manifestation is glomerulonephritis, which leads to renal failure and alveolar capillaritis causing pulmonary hemorrhage.<sup>8</sup> Previous studies have showed that untreated AAV is typically fatal<sup>9</sup>, with 6-month and 1-year mortality rates of 60% and 80%, respectively.<sup>10</sup>

Since the 1950s, glucocorticoids (GCs), as immunosuppressants and anti-inflammatory drugs with a fast-acting and powerful anti-inflammatory effect, became the basis of therapy for AAV.<sup>11,12</sup> The main mechanism of action is genomic and non-genomic effects mediated by cytosolic GC receptors or specific and non-specific interactions with membrane-bound GC receptors resulting in reduced production of pro-inflammatory proteins (transrepression).<sup>13</sup> However, monotherapy has incomplete efficacy.<sup>14</sup> Subsequently, standard therapy emerged using the combination of high-dose GC and cyclophosphamide to achieve remission in AAV<sup>15,16,17</sup> This combination therapy proved to reduce mortality to 25% at 5 years and has high remission rates of 80% – 90%.<sup>18</sup> In addition to cyclophosphamide, clinical remission can also be achieved with rituximab-based or methotrexate-based therapies.<sup>19</sup> Although the combination of high-dose GC and cytotoxic drugs greatly enhances the therapeutic efficacy, high-dose GC may increase the toxicity associated with treatment. Infections and cardiovascular diseases due to the treatment are main causes of fatal side effects

1  
2  
3 and also reduced patients' quality of life (QOL).<sup>20,21</sup> Although these side effects may  
4 be confused by disease activity and co-treatment with cytotoxic drugs, the  
5 immunosuppressive effect will continue to be constant over time, the infection rate  
6 will decrease at the same time as the reduced dose GC.<sup>8</sup> Previous studies have shown  
7 that lower GC doses during the induction period are associated with higher relapse  
8 rates and long-term use of low-dose GC exposes patients to the potential toxicity of  
9 high-cumulative GC.<sup>22,23</sup> Thus, to achieve successful outcomes, a careful balance must  
10 be achieved between the efficacy and safety of treatment with GC.  
11  
12  
13  
14  
15  
16  
17  
18  
19

20 The purpose of this systematic review is to evaluate the comparative efficacy and  
21 safety of alternative glucocorticoid regimens (two (or more) different doses of GC) in  
22 patients with ANCA-associated vasculitis. Our systematic review is a part of the BMJ  
23 Rapid Recommendations project, which is based on the shared vision of the MAGIC  
24 Evidence Ecosystem Foundation ([www.magicproject.org](http://www.magicproject.org)) and The BMJ. When there  
25 is evidence that may change the clinical practice, the cooperative organizations will  
26 act quickly to provide a timely, trustworthy practice guideline. Under such  
27 circumstance, the exciting evidence was the PEXIVAS trial<sup>24</sup>. The systematic review  
28 informed an associated BMJ Rapid Recommendations.  
29  
30  
31  
32  
33  
34  
35  
36  
37  
38

## 39 **Methods**

### 40 **Registration and report**

41 A priori protocol of this systematic review is presented at PROSPERO  
42 (CRD42020179087). We reported this systematic review and meta-analysis based on  
43 the PRISMA (Preferred Reporting Items for Systematic Reviews and Meta-Analyses)  
44 statement (see Appendix 1).<sup>25</sup>  
45  
46  
47  
48  
49  
50  
51  
52

### 53 **Guideline panel and patient and public involvement**

54 According to the process of the BMJ Rapid Recommendations, the guideline panel on  
55 this target provides critical process oversight and content guidance for the systematic  
56 review. The guideline panel consisted of clinicians, methodologists, pharmacists,  
57  
58  
59  
60

1  
2  
3 patient partners with AAV and caregiver partner. The selection of patients and  
4 caregiver is mainly based on the judgment of clinicians and the opinions of the  
5 guideline panel. Patients and caregiver received relevant training and support to meet  
6 patient involvement content throughout the guideline development process. After the  
7 guideline is formed, it will be distributed to all members of the guideline panel for  
8 calibration. In this systematic review, patients and caregiver mainly participated in the  
9 selection of outcome indicators and the selection of treatment preferences.  
10  
11  
12  
13  
14  
15  
16  
17

### 18 **Study selection**

19  
20 We included studies of patients with a diagnosis of active AAV. AAV is defined as  
21 the following categories according to the Chapel Hill Consensus Conference 2012  
22 classification method: microscopic polyangiitis (MPA), granulomatosis with  
23 polyangiitis (GPA), eosinophilic granulomatosis with polyangiitis (EGPA, Churg-  
24 Strauss syndrome).<sup>26</sup> In addition, single organ damage AAV (eg, renal limited  
25 vasculitis (RLV) or idiopathic rapidly progressive glomerulonephritis (RPGN)) can be  
26 considered the fourth entity, although in practice it eventually corresponds to the  
27 kidney-limited form of MPA or GPA.<sup>27</sup>  
28  
29  
30  
31  
32  
33  
34  
35  
36  
37

38 Eligible studies are defined as comparing two (or more) doses of GC in patients with  
39 AAV during induction of remission, regardless of the use of other therapies. Other  
40 therapies include, but are not limited to cyclophosphamide, azathioprine, rituximab,  
41 methotrexate, mycophenolate mofetil and plasma exchange. We included only  
42 randomized controlled trials (RCTs). Outcomes of interest included death, end-stage  
43 kidney disease, serious infections, serious adverse events other than serious infection,  
44 sustained remission and any other patient-important outcomes that are important to  
45 the patient. The timepoint for the outcome assessment depends on what was specified  
46 in individual studies.  
47  
48  
49  
50  
51  
52  
53  
54  
55

### 56 **Data sources and searches**

1  
2  
3 We developed our literature search in collaboration with a medical librarian. We  
4 searched Medline, Embase, Clinicaltrials.gov and Cochrane Central Register of  
5 Controlled Trials (CENTRAL) for relevant studies from the inception to 10 April  
6 2020. There were no restrictions on language. Appendix 2 presents the search  
7 strategies and results. We would also review the reference lists of included studies for  
8 additional references. Pairs of reviewers (YX, JD, TB, MA) independently screened  
9 titles and abstracts, and reviewed the full texts of potentially eligible studies to  
10 determine the final eligible studies. Disagreements were resolved by discussion. To  
11 ensure the validity and consistency of the process, we provided reviewers with review  
12 instruction and conducted calibration exercises before the formal start of each process.  
13  
14  
15  
16  
17  
18  
19  
20  
21  
22

### 23 **Data extraction and risk of bias assessment**

24  
25 We collected data through a predesigned excel extraction form. Pairs of reviewers  
26 (YX, JD, TB, MA) extracted data independently. We resolved disagreements by  
27 discussion. For each eligible study, we collected the following: country/region, design  
28 of the study, patient characteristics (mean age, sex and disease diagnosis), treatment  
29 strategy, outcomes and measures, and follow-up duration. In addition, we emailed the  
30 author of an unpublished registered trial for obtaining relevant data. Pair of reviewers  
31 (YX, JD, TB, MA) independently assessed the risk of bias of each RCT using a  
32 revised Cochrane risk of bias tool that includes sequence generation, concealment of  
33 allocation, blinding (participants, personnel, and outcome assessors), loss to follow-  
34 up, selective outcome reporting and other potential sources of bias.<sup>28</sup> The reviewers  
35 judged each criterion as definitely or probably low risk of bias, or probably or  
36 definitely high risk of bias.  
37  
38  
39  
40  
41  
42  
43  
44  
45  
46  
47  
48  
49

### 50 **Data synthesis or analysis, and grading of evidence**

51  
52 If evidence of studies permitted, we planned to conduct meta-analysis for each of the  
53 outcomes. For continuous outcomes, we planned to use inverse variance statistical  
54 method to calculate mean difference (MD) and 95% confidence interval (CI). For  
55 binary outcomes, we would use the Mantel–Haenszel statistical method to calculate  
56 risk ratio (RR) and 95% CI. We planned to conservatively use a priori random effects  
57  
58  
59  
60

1  
2  
3 model assuming a great variability in treatment effects across the study. We planned  
4 to use the  $I^2$  statistic to assess statistical heterogeneity. And when the effect-estimated  
5  $I^2$  value is >30%, we would attempt to determine the reason for the heterogeneity.  
6  
7 Subgroups would depend on the outcomes of the included studies report. We planned  
8 to check the funnel plot for potential publication bias if the number of eligible studies  
9 in the analysis exceeded ten. We set significance at  $P=0.05$  and would use RevMan  
10 version 5.3 for all statistical analyses.  
11  
12  
13  
14  
15  
16  
17

18 We used the Grading of Recommendations Assessment, Development, and Evaluation  
19 (GRADE) approach<sup>29</sup> to assess the quality of evidence at outcome level by two  
20 reviewers (LZ and YX). We focused on the grading of the following outcomes after  
21 our team discussion: death, end-stage kidney disease, serious infections at one year,  
22 serious adverse events, and health-related quality of life. Disagreements were resolved  
23 by discussion or through a third reviewer (GHG) adjudication. Randomized controlled  
24 trials started as high quality. We summarized the quality of evidence in GRADE  
25 summary of findings using the MAGICapp platform.<sup>30,31</sup>  
26  
27  
28  
29  
30  
31  
32  
33  
34

## 35 **Results**

### 36 **Literature search**

37  
38 The search yielded, after removal of duplicates, 3912 records, 38 of which were  
39 considered for full-text review. The PRISMA flow chart (Figure 1), presents the  
40 reasons for excluding studies at the stage of full text screening. Ultimately, two RCTs  
41 met the inclusion criteria.<sup>18,24</sup>  
42  
43  
44  
45  
46  
47  
48  
49

### 50 **Included studies**

51  
52 The study by Walsh et al (2020)<sup>24</sup> was a multicenter study (median duration of  
53 follow-up 2.9 years) including 704 patients at 95 centers in 16 countries. This study  
54 was a 2-by-2 factorial design and compared the efficacy of plasma exchange with or  
55 without plasma exchange for AAV, as well as the efficacy of a reduced-dose regimen  
56 and a standard-dose regimen of GC over the first 6 months of the treatment period.  
57  
58  
59  
60

The two regimens of oral GC, specifically, patients in the reduced-dose regimen and standard-dose regimen received the same treatment in the first week (the dose was determined according to the patient's weight (50.0 mg/<50 kg, 60.0 mg/50 to 75 kg, 75.0 mg/> 75 kg). The reduced-dose regimen and the standard-dose regimen began to decrease gradually in the second and third weeks, respectively. Finally, at 6th months, the cumulative dose of oral GC in the reduced-dose regimen was less than 60% of the standard-dose regimen.

Furuta 2017<sup>18</sup> was a research protocol describing an RCT enrolling 140 patients at 34 centers in Japan, evaluating whether a low-dose GC regimen (0.5 mg/kg/day) is non-inferior to a high-dose regimen (1.0 mg/kg/day) in efficacy when combined with rituximab for the treatment of AAV. In the protocol, the two treatment groups would use the same rituximab dosing regimen. In the low-dose group, prednisolone will be discontinued at 5 months, while in the high-dose group, prednisolone will be reduced to 10.0 mg/person/day until 6 months. For details see Table 1 "Characteristics of studies originally planned to be included". Because the results of Furuta et al were not publicly available, this review contained only one complete study, so no meta-analysis was conducted.

**Table 1: Characteristics of studies originally planned to be included**

| Author, Year        | Name of the study | Country            | Study design                                    | Disease              | Intervention or contrast*                         | Outcome                                                                                                                                                                                                                                 | Completed | Data availability | ClinicalTrials.gov number |
|---------------------|-------------------|--------------------|-------------------------------------------------|----------------------|---------------------------------------------------|-----------------------------------------------------------------------------------------------------------------------------------------------------------------------------------------------------------------------------------------|-----------|-------------------|---------------------------|
| Walsh et al. (2020) | PEXIV AS          | Multiple countries | Phase III, randomized, open label, 704 patients | ≥15 years severe AAV | reduced-dose GC therapy, standard-dose GC therapy | Primary outcome: a composite of death from any cause or ESKD.<br><br>Secondary outcomes: death from any cause, ESKD, sustained remission, serious adverse events, serious infections within 1 year, and health-related quality of life. | Yes       | Yes               | NCT00987389               |

1  
2  
3  
4  
5  
6  
7  
8  
9  
10

|                                     |       |                     |                                                |                                 |                                         |                 |                                                                                                                                                                                                                  |         |    |             |
|-------------------------------------|-------|---------------------|------------------------------------------------|---------------------------------|-----------------------------------------|-----------------|------------------------------------------------------------------------------------------------------------------------------------------------------------------------------------------------------------------|---------|----|-------------|
| Furuta et al. (2017) <sup>618</sup> | LoVAS | Japan, multicentric | Phase IV, randomized, open label, 140 patients | > 20 years new diagnosis of AAV | low-dose treatment, high-dose treatment | GC high-dose GC | Primary outcome: remission rate at 6 months.<br>Secondary outcomes: time to remission, death, relapse, ESKD and the first serious adverse event, proportion of death, relapse and ESKD for efficacy at 6 months. | Unclear | No | NCT02198248 |
|-------------------------------------|-------|---------------------|------------------------------------------------|---------------------------------|-----------------------------------------|-----------------|------------------------------------------------------------------------------------------------------------------------------------------------------------------------------------------------------------------|---------|----|-------------|

11 \* : Although these two trials are comparisons of different doses of glucocorticoids, the regimens are different, and  
 12 the details are in the text. AAV: antineutrophil cytoplasmic antibodies associated vasculitis; Gcs: glucocorticoids;  
 13 ESKD: end-stage kidney disease.  
 14  
 15  
 16

17 In Walsh's study<sup>24</sup>, 353 patients (female: 44.2%) were assigned reduced-dose GC  
 18 regimen and 351 patients (female: 43.0%) were assigned standard-dose GC regimen.  
 19 The mean age of reduced-dose group was 63.3 years, and the standard-dose group was  
 20 63.1 years. In the reduced-dose group, there were 67 patients undergoing dialysis,  
 21 compared with 73 in the standard-dose group. Pulmonary hemorrhage between the  
 22 reduced-dose group and the standard-dose group was as follows: no hemorrhage  
 23 (257/256), not severe (65/65), severe (31/30).  
 24  
 25  
 26  
 27  
 28  
 29  
 30  
 31

32 **Risk of bias**

33  
 34 PEXIVAS trial was an open-label trial and patients and investigators were aware of  
 35 the group assignments due to the complexity of the GC regimen. However, the  
 36 recorded treatment adherence, lack of available co-interventions, and objective, easily  
 37 ascertained nature of the outcomes, the lack of blinding may have introduced minimal  
 38 bias. Considering the low risk of bias in the other domains this trial, the study is at  
 39 low overall risk of bias.  
 40  
 41  
 42  
 43  
 44  
 45  
 46  
 47

48 **Table 2: Risk of Bias assessment for outcomes using modified risk of bias criteria**  
 49 **of RCT study.**  
 50  
 51

| Outcomes of Trials:            | Sequence generation | Allocation concealment | Blinding (patients) | Blinding (health care providers) | Blinding (outcome assessors) | Blinding (data collectors) | Blinding (data analyst) | Loss to follow-up |
|--------------------------------|---------------------|------------------------|---------------------|----------------------------------|------------------------------|----------------------------|-------------------------|-------------------|
| Michael et al. (2013)<br>Death | Definitely Low      | Definitely Low         | Probably Low        | Probably Low                     | Probably Low                 | Probably Low               | Probably Low            | Definitely Low    |

52  
53  
54  
55  
56  
57  
58  
59  
60



|    |                                |            |            |          |          |          |          |          |            |
|----|--------------------------------|------------|------------|----------|----------|----------|----------|----------|------------|
| 1  |                                |            |            |          |          |          |          |          |            |
| 2  |                                |            |            |          |          |          |          |          |            |
| 3  | ESKD                           | Definitely | Definitely | Probably | Probably | Probably | Probably | Probably | Definitely |
| 4  |                                | Low        | Low        | Low      | Low      | Low      | Low      | Low      | Low        |
| 5  |                                |            |            |          |          |          |          |          |            |
| 6  | Sustained remission            | Definitely | Definitely | Probably | Probably | Probably | Probably | Probably | Definitely |
| 7  |                                | Low        | Low        | Low      | Low      | Low      | Low      | Low      | Low        |
| 8  |                                |            |            |          |          |          |          |          |            |
| 9  | Serious adverse events         | Definitely | Definitely | Probably | Probably | Probably | Probably | Probably | Definitely |
| 10 |                                | Low        | Low        | Low      | Low      | Low      | Low      | Low      | Low        |
| 11 |                                |            |            |          |          |          |          |          |            |
| 12 | Serious infections at 1 year   | Definitely | Definitely | Probably | Probably | Probably | Probably | Probably | Definitely |
| 13 |                                | Low        | Low        | Low      | Low      | Low      | Low      | Low      | Low        |
| 14 |                                |            |            |          |          |          |          |          |            |
| 15 | Health-related quality of life | Definitely | Definitely | Probably | Probably | Probably | Probably | Probably | Definitely |
| 16 |                                | Low        | Low        | Low      | Low      | Low      | Low      | Low      | Low        |

ESKD: end-stage kidney disease; RCT: randomized controlled trial.

## Effect of Interventions

Since the results of the Walsh's study<sup>24</sup> showed no interaction between the GC regimen and the plasma exchange, we only focus on the use of GC in conjunction with the purpose of this review. In this study, 330 patients (93.5%) in the reduced-dose regimen of GC and 325 (92.6%) in the standard-dose regimen of GC were included in the per-protocol population. Table 3 shows the statistical results of outcomes of this study. Table 4 summarizes the GRADE summary of findings for this study. We conducted absolute risk estimation and certainty of the evidence assessment for death or ESKD. Compared with standard-dose regimen, reduced-dose regimen of GC may reduce death (relative risk (RR): 0.86, 95% CI, 0.6 to 1.24, 21 fewer per 1000, low certainty), while not increasing ESKD (RR: 1.02, 95% CI, 0.76 to 1.38, 4 more per 1000, moderate certainty). Results showed that the rate of serious infection at 1 year in the reduced-dose regimen tended to be lower than in the standard-dose regimen (relative risk: 0.82, 95% CI, 0.66 to 1.03, 59 fewer per 1000, moderate certainty). And the standard-dose regimen probably result in little or no increase on serious adverse events at follow-up of longer than 1 year (relative risk: 1.05, 95% CI, 0.94 to 1.18, 31 more per 1000, moderate certainty). Although in further analysis, there were more serious kidney/urinary adverse events in the reduced-dose regimen than in the standard-dose regimen (RR: 1.84, 95% CI, 1.18 to 2.87), there was no significant difference in the incidence of ESKD between the two regimens (RR: 1.02, 95% CI, 0.76 to 1.38). There were no statistical differences in other outcomes between the two regimens, such as health related quality of life.

**Table 3 The statistical results of outcomes**

| Outcomes                                              | RR/MD (95% CI)         |
|-------------------------------------------------------|------------------------|
| Death                                                 | RR: 0.86 (0.6, 1.24)   |
| ESKD                                                  | RR: 1.02 (0.76, 1.38)  |
| Sustained remission                                   | RR: 1.04(0.92, 1.19)   |
| Serious infections at 1 year                          | RR: 0.82 (0.66, 1.03)  |
| Serious adverse events                                | RR: 1.05 (0.94, 1.18)  |
| Health related quality of life following up at 1 year |                        |
| SF-36 PCS                                             | MD: 1.29 (-0.26, 2.84) |
| SF-36 MCS                                             | MD: 0.97 (-0.24, 2.18) |
| EQ-5D Index                                           | MD: 0.02 (-0.01, 0.05) |
| EQ-5D Thermometer                                     | MD: 1.04 (-1.09, 3.17) |
| Serious Adverse Event Type                            |                        |
| Cardiovascular                                        | RR: 1.21 (0.88, 1.66)  |
| Endocrine                                             | RR: 0.50 (0.15, 1.64)  |
| Gastrointestinal                                      | RR: 1.43 (0.92, 2.22)  |
| Hematologic                                           | RR: 1.15 (0.63, 2.09)  |
| Infection                                             | RR: 0.90 (0.74, 1.10)  |
| Kidney/Urinary                                        | RR: 1.84 (1.18, 2.87)  |
| Surgery                                               | RR: 0.93 (0.45, 1.89)  |
| Vasculitis relapse                                    | RR: 1.38 (0.83, 2.32)  |
| Other                                                 | RR: 1.18 (0.90, 1.53)  |

ESKD: end-stage kidney disease; SF-36 = short form 36; PCS = physical component score; MCS = mental component score; EQ = EuroQol; RR: relative risk; MD: mean difference; CI: confidence interval.

**Table 4 GRADE summary of findings on the use of reduced-dose regimen versus standard-dose regimen of glucocorticoids in patients with ANCA-associated vasculitis**

### PICO

Population: Patients with ANCA-associated vasculitis

Intervention: Reduced-dose regimen of glucocorticoids

Comparator: Standard-dose regimen of glucocorticoids

| Outcome | Study results and | Absolute effect estimates | Certainty of the Evidence | Plain text summary |
|---------|-------------------|---------------------------|---------------------------|--------------------|
|---------|-------------------|---------------------------|---------------------------|--------------------|

| Timeframe                                                           | measurements                                                                                                            | Standard-dose regimen of glucocorticoids | Reduced-dose regimen of glucocorticoids | (Quality of evidence)                                      |                                                                                                                                 |
|---------------------------------------------------------------------|-------------------------------------------------------------------------------------------------------------------------|------------------------------------------|-----------------------------------------|------------------------------------------------------------|---------------------------------------------------------------------------------------------------------------------------------|
| Death from any cause longer than 1 year                             | Relative risk: 0.86<br>(CI 95% 0.6 - 1.24)<br>Based on data from 704 patients in 1 study<br>Follow up median 2.9 years  | <b>151</b><br>per 1000                   | <b>130</b><br>per 1000                  | <b>Low</b><br>Due to very serious imprecision <sup>1</sup> | Reduced dose of glucocorticoids may reduce death at follow-up of longer than 1 year                                             |
| End-stage kidney disease longer than 1 year                         | Relative risk: 1.02<br>(CI 95% 0.76 - 1.38)<br>Based on data from 704 patients in 1 study<br>Follow up median 2.9 years | <b>194</b><br>per 1000                   | <b>198</b><br>per 1000                  | <b>Moderate</b><br>Due to serious imprecision <sup>2</sup> | Reduced dose of glucocorticoids probably has little or no effect on end-stage kidney disease at follow-up of longer than 1 year |
| Serious infections at 1 year                                        | Relative risk: 0.82<br>(CI 95% 0.66 - 1.03)<br>Based on data from 704 patients in 1 study<br>Follow up at 1 year        | <b>330</b><br>per 1000                   | <b>271</b><br>per 1000                  | <b>Moderate</b><br>Due to serious imprecision <sup>3</sup> | Reduced dose of glucocorticoids probably has an important reduction in serious infections at 1 year                             |
| Serious adverse events longer than 1 year                           | Relative risk: 1.05<br>(CI 95% 0.94 - 1.18)<br>Based on data from 704 patients in 1 study<br>Follow up median 2.9 years | <b>621</b><br>per 1000                   | <b>652</b><br>per 1000                  | <b>Moderate</b><br>Due to serious imprecision <sup>4</sup> | Reduced dose of glucocorticoids may increase the risk of serious adverse events at follow-up of longer than 1 year.             |
| Health related quality of life (SF-36 PCS) at 1 year <sup>6</sup>   | Measured by: SF-36 PCS<br>Scale: - High better<br>Based on data from 704 patients in 1 study<br>Follow up at 1 year     | <b>37.84</b><br>Mean                     | <b>39.13</b><br>Mean                    | <b>High</b>                                                | Reduced dose of glucocorticoids has little or no effect on health related quality of life (SF-36PCS) at 1 year                  |
| Health related quality of life (SF-36 MCS) at 1 year <sup>7</sup>   | Measured by: SF-36 MCS<br>Scale: - High better<br>Based on data from 704 patients in 1 study<br>Follow up at 1 year     | <b>51.19</b><br>Mean                     | <b>52.16</b><br>Mean                    | <b>High</b>                                                | Reduced dose of glucocorticoids has little or no effect on health related quality of life (SF-36MCS) at 1 year                  |
| Health related quality of life (EQ-5D Index) at 1 year <sup>8</sup> | Measured by: EQ-5D Index<br>Scale: - High better<br>Based on data from 704 patients in 1 study                          | <b>0.77</b><br>Mean                      | <b>0.79</b><br>Mean                     | <b>Moderate</b><br>Due to serious imprecision <sup>5</sup> | Reduced dose of glucocorticoids probably has little or no effect on health related quality of life (EQ-5D) at 1 year            |

|                                                                           |                                                                                                                             |                                                                                                |                      |             |                                                                                                                         |
|---------------------------------------------------------------------------|-----------------------------------------------------------------------------------------------------------------------------|------------------------------------------------------------------------------------------------|----------------------|-------------|-------------------------------------------------------------------------------------------------------------------------|
|                                                                           | Follow up at 1 year                                                                                                         |                                                                                                |                      |             |                                                                                                                         |
| Health related quality of life (EQ-5D Thermometer) at 1 year <sup>8</sup> | Measured by: EQ-5D Thermometer<br>Scale: - High better<br>Based on data from 704 patients in 1 study<br>Follow up at 1 year | <b>71.07</b><br>Mean<br>Difference: <b>MD 1.04 higher</b><br>(CI 95% 1.09 lower - 3.17 higher) | <b>72.11</b><br>Mean | <b>High</b> | Reduced dose of glucocorticoids has little or no effect on health related quality of life (EQ-5D Thermometer) at 1 year |

1. **Imprecision: Very serious.** Because the 95% CI includes both the minimally important difference for benefit (20 fewer death in 1000 patients) and minimally important difference for harm (20 more death in 1000 patients), we rated down two levels for imprecision;

2. **Imprecision: Serious.** The 95% CI crosses the minimally important difference for benefit (30 fewer ESKD in 1000 patients) and minimally important difference for harm (30 more ESKD in 1000 patients) ;

3. **Imprecision: Serious.** The 95% CI crosses the minimally important difference (50 fewer serious infections in 1000 patients);

4. **Imprecision: Serious.** The 95% CI includes an increase in serious adverse event over 10%;

5. **Imprecision: Serious.** The 95% CI crosses the minimally important difference for benefit and the minimally important difference for harm (0.03 reduction or increase in EQ-5D Index) ;

6. SF-36 = short form 36; PCS = physical component score

7. SF-36 = short form 36; MCS =mental component score

8. EQ = EuroQol

## Discussion

After full text screening, we identified 2 studies<sup>18,24</sup> involving 844 patients that met our selection criteria for studies comparing different doses regimens of GC for the treatment of AAV. Because Furuta's article<sup>18</sup> is a protocol and there are currently no study results available, this review ultimately analyzed the results of PEXIVAS. This study is by far the largest trial conducted in AAV or any form of vasculitis.

According to the results of this finally included trial, the results of the absolute effects of low certainty of evidence showed that reduced-dose regimen of GC may reduce death at the follow-up of longer than 1 year, while not increasing the rate of ESKD (moderate certainty) among patients with AAV when compared with standard-dose regimen. However, due to the wide CIs, the absolute effects of any intervention on these two outcomes were minimal, and the results were not significantly different. This may be due to the fact that patients included in the trial had severe AAV (kidney involvement or diffuse alveolar hemorrhage), were seriously ill and likely had a poor

1  
2  
3 prognosis. Additionally, in this trial, the improvement of the disease by other  
4 treatments may mask the benefits of reduced-doses regimen.  
5  
6  
7  
8  
9

10 In addition, relative to the standard-dose regimen, moderate certainty of evidence  
11 indicated that the reduced-dose regimen probably has an important reduction in  
12 serious infections at 1 year but may have little or no effect on the overall risk of  
13 serious adverse events. This study showed that reduced-dose regimen does have an  
14 obvious advantage in reducing infections, which echoes previous studies.<sup>17,32</sup> For  
15 example, Jayne et al. reported that when high-dose GC was used, infection was most  
16 common in the first 6 months of treating severe renal vasculitis.<sup>17</sup> Therefore,  
17 considering that the most common cause of death more than one year after diagnosis  
18 of AAV is infection or uncontrolled vasculitis,<sup>16,33,34,35</sup> this is particularly important to  
19 support the practice of the conclusion of this study.  
20  
21  
22  
23  
24  
25  
26  
27  
28  
29

30 Although in the analysis of serious adverse event type, the reduced-dose regimen had  
31 more renal/urinary adverse events than the standard-dose regimen, there was no  
32 significant difference in the incidence of ESKD between the two regimens as  
33 described above. This may be related to the treatment status of the included patients.  
34 Among the patients included in the study, the number of patients in the standard-dose  
35 regimen who had undergone dialysis before the start of the trial was more than that in  
36 the reduced-dose regimen. It is well known that dialysis reduces the occurrence of  
37 serious adverse events in the urinary system.  
38  
39  
40  
41  
42  
43  
44  
45  
46

47 The use of GC transformed AAV from an almost uniformly fatal condition to one  
48 characterized by remissions and relapses complicated by drug-induced adverse events.  
49 Despite the ubiquitous use of GC for AAV, there was no standardization of dose  
50 regimens, guidelines were ambiguous and practice patterns varied substantially. The  
51 PEXIVAS trial<sup>24</sup> supports the important role GC plays in causing adverse events and  
52 highlights the need to optimize their use. Although PEXIVAS found evidence to  
53 support one regimen of GC over another, further research is needed to determine  
54 whether the GC regimen can be further improved for the treatment of AAV.  
55  
56  
57  
58  
59  
60

1  
2  
3  
4  
5  
6 The advantages of this systematic review include a comprehensive search of emerging  
7 and past evidence across databases without being restricted by study design or  
8 publication language, and the use of GRADE approach to assess the quality of  
9 evidence. Decisions regarding eligible studies, data extraction, and risk of bias  
10 assessments were all performed in duplicate, and calibration exercises were conducted  
11 before the formal start of the project. By excluding non-RCT studies, we limited the  
12 risk of bias. The RCT we included is of sound methodological quality. AAV is a rare  
13 disease, and the study is the largest global trial on the subject so far which has  
14 improved the generalizability of the results through the efforts of national and  
15 international vasculitis networks and extensive selection criteria.  
16  
17  
18  
19  
20  
21  
22  
23  
24  
25

26 The results of our systematic review also have some limitations. First, only one trial  
27 was included and although it was broadly inclusive and contained more events than  
28 any other trial in this disease, the total statistical information remains low. This is  
29 particularly obvious for serious adverse events other than serious infection. However,  
30 the reduced-dose GC regimen should not result in more treatment related adverse  
31 events (i.e. it is illogical that a lower exposure to GC would have anything but the  
32 same or lower rate of GC caused side effects) and there is reasonable precision around  
33 the efficacy outcomes. This limitation is expected to result in an underappreciation of  
34 the benefits of reducing the GC dose, a limitation that is supported by observational  
35 studies of GC which suggest reducing GC exposure may also reduce fractures, peptic  
36 ulcer disease, psychiatric disease, weight gain and dysglycemia. In addition, despite  
37 the excellent methodological quality of the included trial, this is an open label and is  
38 subject to biases despite our relative confidence that differential treatment or outcome  
39 ascertainment was at low risk. Despite the large scale of this study for a rare disease,  
40 the degree to which the results can be generalized to patients with non-severe AAV is  
41 uncertain, although it is likely safer to extrapolate the safety of the regimen from more  
42 severe illness to less severe illness rather than less severe to more severe.  
43  
44  
45  
46  
47  
48  
49  
50  
51  
52  
53  
54  
55  
56  
57

## 58 **Conclusion**

59  
60

1  
2  
3 An important general rule is that in routine clinical practice, the use of conventional  
4 GC should be “as much as necessary, but as little as possible.”<sup>36</sup> Therefore, compared  
5 with the standard-dose regimen, the reduced-dose regimen of GC may reduce death,  
6 probably has little or no effect on ESKD among patients with AAV, and resulted in a  
7 lower risk of serious infections at 1 year. Future clinical trials should evaluate whether  
8 GC dosing can be further safely reduced.  
9  
10  
11  
12  
13  
14  
15  
16

17 Acknowledgements: We thank members of the Rapid Recommendations panel for  
18 critical feedback on outcome and subgroup selection, GRADE judgments, and  
19 manuscript feedback.  
20  
21

22 Contributors: MW, AM, DJ, PM and GHG conceived of the study idea. RC  
23 performed the literature search. YX, JD, TB and MA performed the screening, data  
24 abstraction, and risk of bias assessments. YX, LZ and MW performed the data  
25 analysis. YX, GHG, LZ, RS, DJ, PM and MW interpreted the data. YX, GHG and LZ  
26 performed the certainty assessment. YX, GHG, LZ and MW drafted the manuscript.  
27 All authors critically revised the manuscript. All authors approved the final version of  
28 the manuscript. YX and MW had full access to the data in the study and takes  
29 responsibility for the integrity of the data and the accuracy of the data analysis. YX  
30 and MW are the guarantors.  
31  
32  
33  
34  
35  
36  
37  
38

39 Funding: This research received no specific grant from any funding agency in the  
40 public, commercial or not-for-profit sectors.  
41

42 Competing Interests: All authors have completed the ICMJE uniform disclosure form.  
43

44 Ethical approval statement: Not required.  
45

46 Patient consent statement: Not required.  
47

48 Provenance and peer review statement: Not commissioned; externally peer reviewed.  
49

50 Data sharing statement: No additional data available.  
51

52 Transparency statement: YX and MW affirm that the manuscript is an honest,  
53 accurate, and transparent account of the recommendation being reported; that no  
54 important aspects of the recommendation have been omitted; and that any  
55 discrepancies from the recommendation as planned (and, if relevant, registered) have  
56 been explained.  
57  
58  
59  
60

## References

1. Houben E, Penne EL, Voskuyl AE, et al. Cardiovascular events in anti-neutrophil cytoplasmic antibody-associated vasculitis: a meta-analysis of observational studies. *Rheumatology (Oxford)* 2018;57(3):555-562.
2. Bosch X, Guilabert A, Font J. Antineutrophil cytoplasmic antibodies. *Lancet* 2006;368(9533):404-41816876669.
3. Wallace ZS, Miloslavsky EM. Management of ANCA associated vasculitis. *BMJ* 2020;368:m421.
4. Jennette JC, Falk RJ. Pathogenesis of antineutrophil cytoplasmic autoantibody-mediated disease. *Nat Rev Rheumatol* 2014;10:463-73.
5. Salvador F. ANCA Associated Vasculitis. *Eur J Intern Med* 2020;74:18-28.
6. Smith RM. Update on the treatment of ANCA associated vasculitis. *Presse Med* 2015;44(6 Pt 2):e241-9.
7. Hoffman GS, Kerr GS, Leavitt RY, et al. Wegener granulomatosis: an analysis of 158 patients. *Ann Intern Med* 1992;116:488-98.
8. Walsh M, Merkel PA, Peh CA, et al.; PEXIVAS Investigators. Plasma exchange and glucocorticoid dosing in the treatment of anti-neutrophil cytoplasm antibody associated vasculitis (PEXIVAS): protocol for a randomized controlled trial. *Trials* 2013;14:73.
9. Keller SF, Miloslavsky EM. Corticosteroids in Antineutrophil Cytoplasmic Antibody-Associated Vasculitis. *Rheum Dis Clin North Am* 2016;42(1):91-101.
10. Booth AD, Almond MK, Burns A, et al., Pan-Thames Renal Research Group. Outcome of ANCA-associated renal vasculitis: a 5-year retrospective study. *Am J Kidney Dis* 2003; 41(4):776-84.
11. Jennette JC, Falk RJ. Small-vessel vasculitis. *N Engl J Med* 1997;337(21):1512–23.
12. Lally L, Spiera R. Current landscape of antineutrophil cytoplasmic antibody-associated vasculitis: classification, diagnosis, and treatment. *Rheum Dis Clin North Am* 2015;41(1):1–19, vii.
13. Stahn C, Buttgerit F. Genomic and nongenomic effects of glucocorticoids. *Nat Clin Pract Rheumatol* 2008;4:525-33.
14. Walton EW. Giant-cell granuloma of the respiratory tract (Wegener's granulomatosis). *Br Med J* 1958;2:265-70.
15. de Groot K, Harper L, Jayne DR, et al. Pulse versus daily oral cyclophosphamide for induction of remission in antineutrophil cytoplasmic antibody-associated vasculitis: a randomized trial. *Ann Intern Med* 2009;150:670–80.
16. De Groot K, Rasmussen N, Bacon PA, et al. Randomized trial of cyclophosphamide versus methotrexate for induction of remission in early systemic antineutrophil cytoplasmic antibody-associated vasculitis. *Arthritis Rheum* 2005;52:2461–9.
17. Jayne DR, Gaskin G, Rasmussen N, et al. Randomized trial of plasma exchange or high-dosage methylprednisolone as adjunctive therapy for severe renal vasculitis. *J Am Soc Nephrol* 2007;18:2180–8.



18. Furuta S, Sugiyama T, Umibe T, et al.. Low-dose glucocorticoids plus rituximab versus high-dose glucocorticoids plus rituximab for remission induction in ANCA-associated vasculitis (LoVAS): protocol for a multicentre, open-label, randomised controlled trial. *BMJ Open* 2017 Dec 14;7(12):e018748.
19. Keller SF, Miloslavsky EM. Corticosteroids in Antineutrophil Cytoplasmic Antibody-Associated Vasculitis. *Rheum Dis Clin North Am* 2016;42(1):91-101.
20. Flossmann O, Berden A, de Groot K, et al. Long-term patient survival in ANCA-associated vasculitis. *Ann Rheum Dis* 2011;70:488–94.
21. Furuta S, Chaudhry AN, Hamano Y, et al. Comparison of phenotype and outcome in microscopic polyangiitis between Europe and Japan. *J Rheumatol* 2014;41:325–33.
22. Walsh M, Merkel PA, Mahr A, et al. Effects of duration of glucocorticoid therapy on relapse rate in antineutrophil cytoplasmic antibody-associated vasculitis: a meta-analysis. *Arthritis Care Res* 2010;62:1166–73.
23. Wada T, Hara A, Arimura Y, et al. Risk factors associated with relapse in Japanese patients with microscopic polyangiitis. *J Rheumatol* 2012;39:545–51.
24. Walsh M, Merkel PA, Peh CA, et al. Plasma Exchange and Glucocorticoids in Severe ANCA-Associated Vasculitis. *N Engl J Med* 2020;382(7):622-631.
25. Moher D, Liberati A, Tetzlaff J, et al.; PRISMA Group. Preferred reporting items for systematic reviews and meta-analyses: the PRISMA statement. *J Clin Epidemiol* 2009;62:1006-12.
26. Salvador F. ANCA associated vasculitis. *Eur J Intern Med* 2020;74:18-28.
27. Pagnoux C. Updates in ANCA-associated vasculitis. *Eur J Rheumatol* 2016;3(3):122-133.
28. Guyatt G, Busse JW. Risk of bias in randomized trials. *GROWTH Evidence*; 2016. Available: <https://growthevidence.com/gordon-h-guyatt-md-msc-and-jason-w-busse-dc-phd> (accessed 2020 April. 6).
29. Guyatt G, Oxman AD, Akl EA, et al. GRADE guidelines: 1. Introduction-GRADE evidence profiles and summary of findings tables. *J Clin Epidemiol* 2011; 64: 383-94.
30. Guyatt GH, Oxman AD, Santesso N, et al. GRADE guidelines: 12. Preparing summary of findings tables-binary outcomes. *J Clin Epidemiol* 2013;66:158-72.
31. Guyatt GH, Thorlund K, Oxman AD, et al. GRADE guidelines: 13. Preparing summary of findings tables and evidence profiles-continuous outcomes. *J Clin Epidemiol* 2013;66:173-83.
32. Illei GG, Yarboro CH, Kuroiwa T, et al.. Long-term effects of combination treatment with fludarabine and low-dose pulse cyclophosphamide in patients with lupus nephritis. *Rheumatology (Oxford)* 2007;46:952–956.
33. Flossmann O, Berden A, de Groot K, et al., European Vasculitis Study Group. Long-term patient survival in ANCA-associated vasculitis. *Ann Rheum Dis* 2011;70:488-94.
34. Jones RB, Tervaert JWC, Hauser T, et al. Rituximab versus cyclophosphamide in ANCA-associated renal vasculitis. *N Engl J Med* 2010;363(3):211-20.
35. Jayne D, Rasmussen N, Andrassy K, et al.; European Vasculitis Study Group: A randomized trial of maintenance therapy for vasculitis associated with antineutrophil cytoplasmic autoantibodies. *N Engl J Med* 349 : 36 –44, 2003.
36. Buttgereit F, Burmester GR, Lipworth BJ. Optimised glucocorticoid therapy: the sharpening of an old spear. *Lancet* 2005;365(9461):801-3.

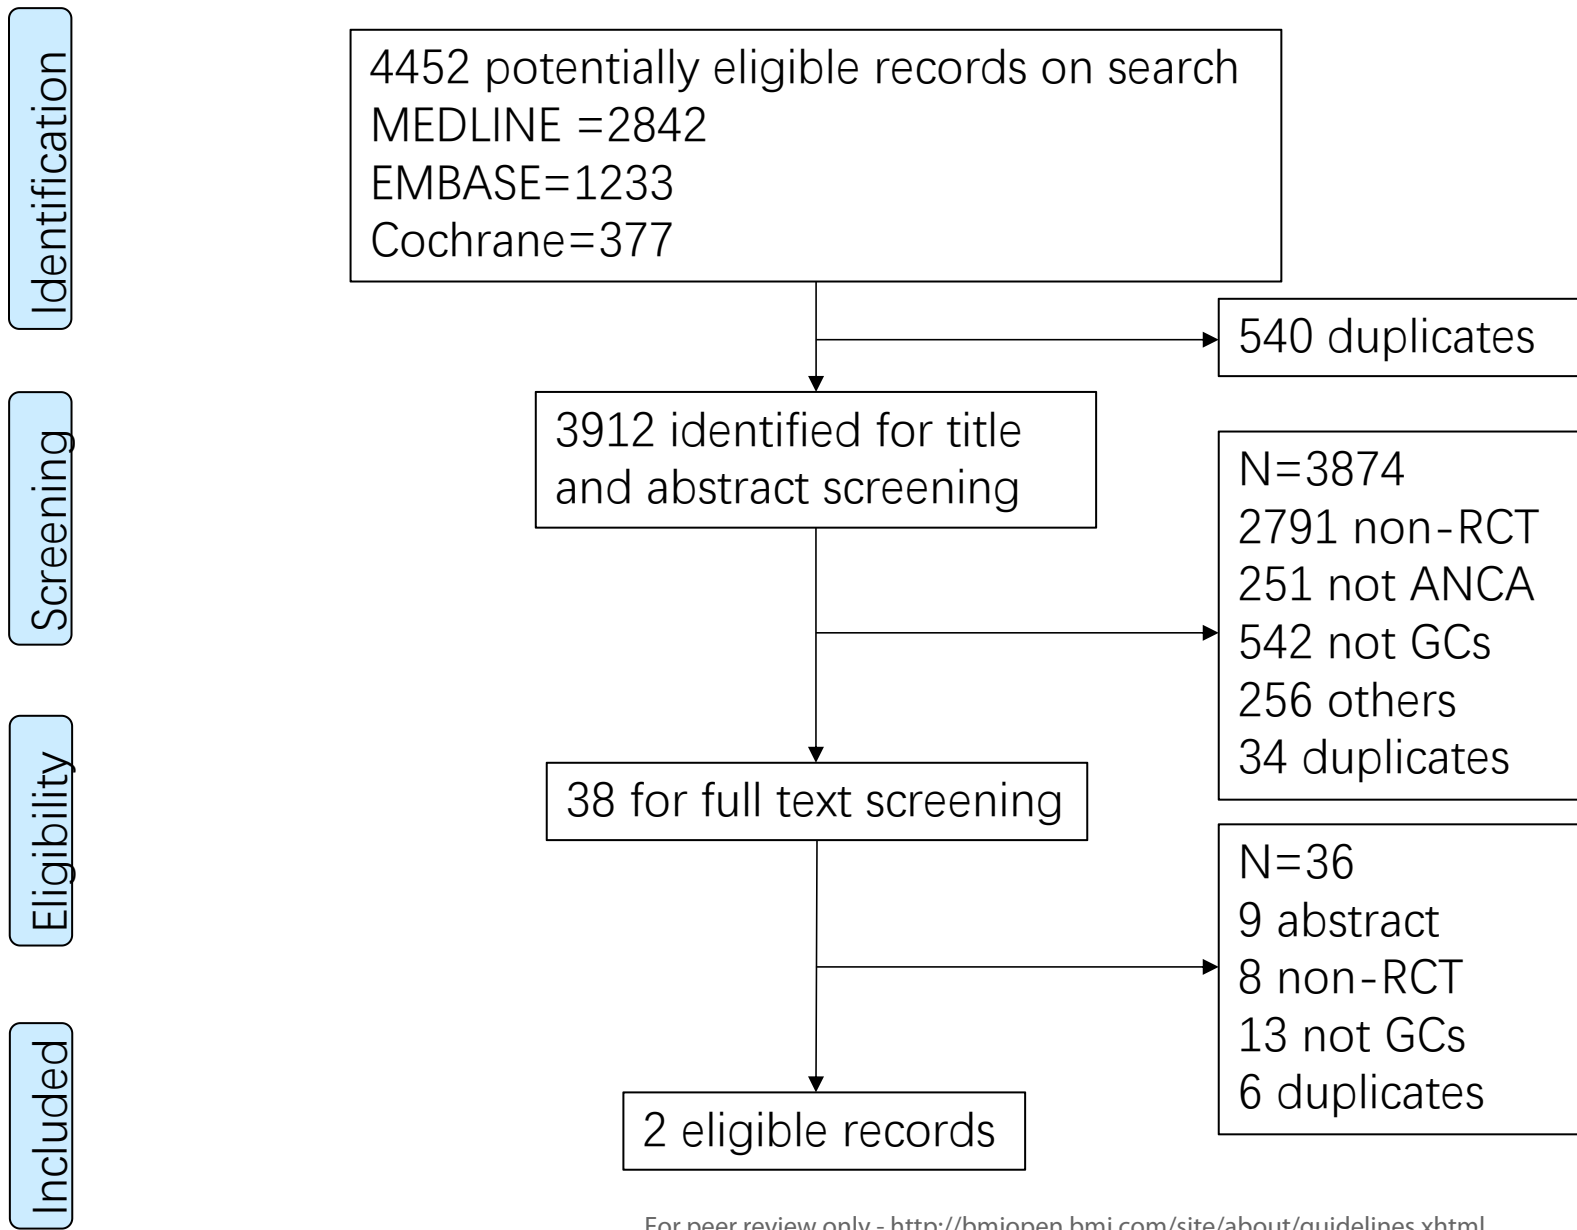

For peer review only - <http://bmjopen.bmj.com/site/about/guidelines.xhtml>

**Figure 1 PRISMA flow chart of literature search and screening process**

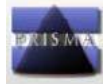

# PRISMA 2009 Checklist

| Section/topic                      | #  | Checklist item                                                                                                                                                                                                                                                                                              | Reported on page # |
|------------------------------------|----|-------------------------------------------------------------------------------------------------------------------------------------------------------------------------------------------------------------------------------------------------------------------------------------------------------------|--------------------|
| <b>TITLE</b>                       |    |                                                                                                                                                                                                                                                                                                             |                    |
| Title                              | 1  | Identify the report as a systematic review, meta-analysis, or both.                                                                                                                                                                                                                                         | 1                  |
| <b>ABSTRACT</b>                    |    |                                                                                                                                                                                                                                                                                                             |                    |
| Structured summary                 | 2  | Provide a structured summary including, as applicable: background; objectives; data sources; study eligibility criteria, participants, and interventions; study appraisal and synthesis methods; results; limitations; conclusions and implications of key findings; systematic review registration number. | 3-4                |
| <b>INTRODUCTION</b>                |    |                                                                                                                                                                                                                                                                                                             |                    |
| Rationale                          | 3  | Describe the rationale for the review in the context of what is already known.                                                                                                                                                                                                                              | 6-7                |
| Objectives                         | 4  | Provide an explicit statement of questions being addressed with reference to participants, interventions, comparisons, outcomes, and study design (PICOS).                                                                                                                                                  | 6-7                |
| <b>METHODS</b>                     |    |                                                                                                                                                                                                                                                                                                             |                    |
| Protocol and registration          | 5  | Indicate if a review protocol exists, if and where it can be accessed (e.g., Web address), and, if available, provide registration information including registration number.                                                                                                                               | 7                  |
| Eligibility criteria               | 6  | Specify study characteristics (e.g., PICOS, length of follow-up) and report characteristics (e.g., years considered, language, publication status) used as criteria for eligibility, giving rationale.                                                                                                      | 8                  |
| Information sources                | 7  | Describe all information sources (e.g., databases with dates of coverage, contact with study authors to identify additional studies) in the search and date last searched.                                                                                                                                  | 8                  |
| Search                             | 8  | Present full electronic search strategy for at least one database, including any limits used, such that it could be repeated.                                                                                                                                                                               | 8                  |
| Study selection                    | 9  | State the process for selecting studies (i.e., screening, eligibility, included in systematic review, and, if applicable, included in the meta-analysis).                                                                                                                                                   | 8                  |
| Data collection process            | 10 | Describe method of data extraction from reports (e.g., piloted forms, independently, in duplicate) and any processes for obtaining and confirming data from investigators.                                                                                                                                  | 9                  |
| Data items                         | 11 | List and define all variables for which data were sought (e.g., PICOS, funding sources) and any assumptions and simplifications made.                                                                                                                                                                       | 9                  |
| Risk of bias in individual studies | 12 | Describe methods used for assessing risk of bias of individual studies (including specification of whether this was done at the study or outcome level), and how this information is to be used in any data synthesis.                                                                                      | 9                  |
| Summary measures                   | 13 | State the principal summary measures (e.g., risk ratio, difference in means).                                                                                                                                                                                                                               | 9-10               |
| Synthesis of results               | 14 | Describe the methods of handling data and combining results of studies, if done, including measures of consistency (e.g., $I^2$ ) for each meta-analysis.                                                                                                                                                   | 9-10               |

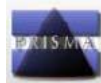

# PRISMA 2009 Checklist

| Section/topic                 | #  | Checklist item                                                                                                                                                                                           | Reported on page # |
|-------------------------------|----|----------------------------------------------------------------------------------------------------------------------------------------------------------------------------------------------------------|--------------------|
| Risk of bias across studies   | 15 | Specify any assessment of risk of bias that may affect the cumulative evidence (e.g., publication bias, selective reporting within studies).                                                             | 9-10               |
| Additional analyses           | 16 | Describe methods of additional analyses (e.g., sensitivity or subgroup analyses, meta-regression), if done, indicating which were pre-specified.                                                         | 9-10               |
| <b>RESULTS</b>                |    |                                                                                                                                                                                                          |                    |
| Study selection               | 17 | Give numbers of studies screened, assessed for eligibility, and included in the review, with reasons for exclusions at each stage, ideally with a flow diagram.                                          | 10                 |
| Study characteristics         | 18 | For each study, present characteristics for which data were extracted (e.g., study size, PICOS, follow-up period) and provide the citations.                                                             | 10-11              |
| Risk of bias within studies   | 19 | Present data on risk of bias of each study and, if available, any outcome level assessment (see item 12).                                                                                                | 12                 |
| Results of individual studies | 20 | For all outcomes considered (benefits or harms), present, for each study: (a) simple summary data for each intervention group (b) effect estimates and confidence intervals, ideally with a forest plot. | 11-12              |
| Synthesis of results          | 21 | Present results of each meta-analysis done, including confidence intervals and measures of consistency.                                                                                                  | 13-15              |
| Risk of bias across studies   | 22 | Present results of any assessment of risk of bias across studies (see Item 15).                                                                                                                          | 12                 |
| Additional analysis           | 23 | Give results of additional analyses, if done (e.g., sensitivity or subgroup analyses, meta-regression [see Item 16]).                                                                                    | 13-15              |
| <b>DISCUSSION</b>             |    |                                                                                                                                                                                                          |                    |
| Summary of evidence           | 24 | Summarize the main findings including the strength of evidence for each main outcome; consider their relevance to key groups (e.g., healthcare providers, users, and policy makers).                     | 16-17              |
| Limitations                   | 25 | Discuss limitations at study and outcome level (e.g., risk of bias), and at review-level (e.g., incomplete retrieval of identified research, reporting bias).                                            | 18                 |
| Conclusions                   | 26 | Provide a general interpretation of the results in the context of other evidence, and implications for future research.                                                                                  | 18                 |
| <b>FUNDING</b>                |    |                                                                                                                                                                                                          |                    |
| Funding                       | 27 | Describe sources of funding for the systematic review and other support (e.g., supply of data); role of funders for the systematic review.                                                               | 19                 |

From: Moher D, Liberati A, Tetzlaff J, Altman DG, The PRISMA Group (2009). Preferred Reporting Items for Systematic Reviews and Meta-Analyses: The PRISMA Statement. PLoS Med 6(7): e1000097. doi:10.1371/journal.pmed1000097

For more information, visit: [www.prisma-statement.org](http://www.prisma-statement.org).

**Appendix 2: Search strategies and results for The comparative efficacy and safety of alternative glucocorticoids regimens in patients with ANCA-associated vasculitis: A systematic review**

| Database         | No of records |
|------------------|---------------|
| MEDLINE          | 2842          |
| EMBASE           | 1233          |
| Cochrane Library | 377           |
| Subtotal         | 4452          |
| -duplicates      | -540          |
| Total            | 3912          |

Database: OVID MEDLINE

- 
- 1 Anti-Neutrophil Cytoplasmic Antibody-Associated Vasculitis/ (1682)
  - 2 Churg-Strauss Syndrome/ (2090)
  - 3 Microscopic Polyangiitis/ (507)
  - 4 Granulomatosis with Polyangiitis/ (6902)
  - 5 (vasculit\* adj3 (ANCA or AAV or antineutrophil or anti-neutrophil or cytoplasm\* or RLV or renal or churg or strauss or pauci immune)).mp. [mp=title, abstract, original title, name of substance word, subject heading word, floating sub-heading word, keyword heading word, organism supplementary concept word, protocol supplementary concept word, rare disease supplementary concept word, unique identifier, synonyms] (4968)
  - 6 churg strauss.mp. (2876)
  - 7 ((angiit\* or vasculit\*) adj3 (granulom\* or necrot\* or allergic)).mp. [mp=title, abstract, original title, name of substance word, subject heading word, floating sub-heading word, keyword heading word, organism supplementary concept word, protocol supplementary concept word, rare disease supplementary concept word, unique identifier, synonyms] (4297)
  - 8 ((polyangiit\* or polyarterit\*) adj3 (microscop\* or MPA or granulom\*)).mp. (9268)
  - 9 wegener\*.mp. (6572)
  - 10 (glomerulonephrit\* adj3 necrot\*).mp. [mp=title, abstract, original title, name of substance word, subject heading word, floating sub-heading word, keyword heading word, organism supplementary concept word, protocol supplementary concept word, rare disease supplementary concept word, unique identifier, synonyms] (797)
  - 11 or/1-10 (18126)
  - 12 exp Glucocorticoids/ (190619)
  - 13 prednisolone/ or methylprednisolone/ (49855)
  - 14 Prednisone/ (39084)
  - 15 Adrenal Cortex Hormones/ (63823)

- 1  
2  
3 16 (corticosteroid\* or glucocorticoid\* or methylprednisolon\* or prednison\* or  
4 prednisolon\*).mp. [mp=title, abstract, original title, name of substance word, subject  
5 heading word, floating sub-heading word, keyword heading word, organism  
6 supplementary concept word, protocol supplementary concept word, rare disease  
7 supplementary concept word, unique identifier, synonyms] (283874)  
8  
9 17 Corticosterone/ or corticosteron\*.mp. (34191)  
10 18 Hydrocortisone/ or hydrocortison\*.mp. (76765)  
11 19 Cortisone/ or cortison\*.mp. (23710)  
12 20 steroids.mp. or Steroids/ (112972)  
13 21 Cortodoxone/ or cortodoxon\*.mp. (856)  
14 22 Hydroxycorticosteroids/ or hydroxycorticosteroid\*.mp. (6731)  
15 23 Dexamethasone/ or dexamethason\*.mp. (71052)  
16 24 adrenocorticosteroid\*.mp. (313)  
17 25 adrenocorticoid\*.mp. (177)  
18 26 corticoid\*.mp. (6458)  
19 27 or/12-26 (547377)  
20 28 11 and 27 (4782)  
21 29 randomized controlled trial.pt. (503644)  
22 30 controlled clinical trial.pt. (93611)  
23 31 randomized.ab. (475606)  
24 32 placebo.ab. (206694)  
25 33 drug therapy.fs. (2193818)  
26 34 randomly.ab. (330775)  
27 35 trial.ab. (501000)  
28 36 groups.ab. (2031658)  
29 37 or/29-36 (4675601)  
30 38 exp animals/ not humans.sh. (4689197)  
31 39 37 not 38 (4053127)  
32 40 28 and 39 (2842)  
33  
34  
35  
36  
37  
38  
39  
40

Database: EMBASE

- 41  
42 1 ANCA associated vasculitis/ (5871)  
43 2 Churg Strauss syndrome/ (4947)  
44 3 microscopic polyangiitis/ (3039)  
45 4 Wegener granulomatosis/ (12860)  
46 5 (vasculit\* adj3 (ANCA or AAV or antineutrophil or anti-neutrophil or cytoplasm\*  
47 or RLV or renal or churg or strauss or pauci immune)).mp. [mp=title, abstract,  
48 heading word, drug trade name, original title, device manufacturer, drug  
49 manufacturer, device trade name, keyword, floating subheading word, candidate  
50 term word] (9651)  
51 6 churg strauss.mp. (5425)  
52 7 ((angiit\* or vasculit\*) adj3 (granulom\* or necrot\* or allergic)).mp. [mp=title,  
53 abstract, heading word, drug trade name, original title, device manufacturer, drug  
54  
55  
56  
57  
58  
59  
60

1  
2  
3 manufacturer, device trade name, keyword, floating subheading word, candidate  
4 term word] (7160)  
5 8 ((polyangiit\* or polyarterit\*) adj3 (microscop\* or MPA or granulom\*)).mp.  
6 [mp=title, abstract, heading word, drug trade name, original title, device  
7 manufacturer, drug manufacturer, device trade name, keyword, floating subheading  
8 word, candidate term word] (7171)  
9 9 wegener\*.mp. (14257)  
10 10 (glomerulonephrit\* adj3 necrot\*).mp. [mp=title, abstract, heading word, drug  
11 trade name, original title, device manufacturer, drug manufacturer, device trade  
12 name, keyword, floating subheading word, candidate term word] (1243)  
13 11 or/1-10 (29983)  
14 12 exp glucocorticoid/ (700322)  
15 13 prednisolone/ (122582)  
16 14 methylprednisolone/ (93152)  
17 15 prednisone/ (167298)  
18 16 corticosteroid/ (229322)  
19 17 (corticosteroid\* or glucocorticoid\* or methylprednisolon\* or prednison\* or  
20 prednisolon\*).mp. [mp=title, abstract, heading word, drug trade name, original title,  
21 device manufacturer, drug manufacturer, device trade name, keyword, floating  
22 subheading word, candidate term word] (688798)  
23 18 corticosterone/ or corticosteron\*.mp. (38497)  
24 19 hydrocortisone/ or hydrocortison\*.mp. (135041)  
25 20 cortisone/ or cortison\*.mp. (17205)  
26 21 steroids.mp. or steroid/ (245681)  
27 22 cortodoxone/ or cortodoxon\*.mp. (2044)  
28 23 hydroxycorticosteroid\*.mp. or hydroxycorticosteroid/ (2310)  
29 24 dexamethasone/ or dexamethason\*.mp. (161446)  
30 25 adrenocorticosteroid\*.mp. (286)  
31 26 adrenocorticoid\*.mp. (169)  
32 27 corticoid\*.mp. (7745)  
33 28 or/12-27 (1111323)  
34 29 11 and 28 (13676)  
35 30 randomized controlled trial/ (598366)  
36 31 Controlled clinical study/ (463908)  
37 32 random\$.ti,ab. (1520687)  
38 33 randomization/ (86548)  
39 34 intermethod comparison/ (258594)  
40 35 placebo.ti,ab. (303776)  
41 36 (compare or compared or comparison).ti. (505122)  
42 37 ((evaluated or evaluate or evaluating or assessed or assess) and (compare or  
43 compared or comparing or comparison)).ab. (2085158)  
44 38 (open adj label).ti,ab. (78322)  
45 39 ((double or single or doubly or singly) adj (blind or blinded or blindly)).ti,ab.  
46 (230181)  
47 40 double blind procedure/ (171296)  
48 41 parallel group\$.ti,ab. (25234)

1  
 2  
 3 42 (crossover or cross over).ti,ab. (104111)  
 4 43 ((assign\$ or match or matched or allocation) adj5 (alternate or group\$1 or  
 5 intervention\$1 or patient\$1 or subject\$1 or participant\$1)).ti,ab. (326088)  
 6 44 (assigned or allocated).ti,ab. (383843)  
 7 45 (controlled adj7 (study or design or trial)).ti,ab. (343989)  
 8 46 (volunteer or volunteers).ti,ab. (244774)  
 9 47 human experiment/ (490852)  
 10 48 trial.ti. (296188)  
 11 49 or/30-48 (4957675)  
 12 50 29 and 49 (1233)  
 13  
 14  
 15  
 16  
 17  
 18

Database: Cochrane Library

---

19  
 20 ID Search Hits  
 21 #1 MeSH descriptor: [Anti-Neutrophil Cytoplasmic Antibody-Associated  
 22 Vasculitis] explode all trees 157  
 23 #2 MeSH descriptor: [Churg-Strauss Syndrome] explode all trees 27  
 24 #3 MeSH descriptor: [Microscopic Polyangiitis] explode all trees 40  
 25 #4 MeSH descriptor: [Granulomatosis with Polyangiitis] explode all trees 82  
 26 #5 vasculit\* near/3 (ANCA or AAV or antineutrophil or anti-neutrophil or  
 27 cytoplasm\* or RLV or renal or churg or strauss or pauci immune) 470  
 28 #6 churg strauss 112  
 29 #7 ((angiit\* or vasculit\*) near/3 (granulom\* or necrot\* or allergic)) 102  
 30 #8 ((polyangiit\* or polyarterit\*) near/3 (microscop\* or MPA or granulom\*))  
 31 277  
 32 #9 wegener\* 394  
 33 #10 (glomerulonephrit\* near/3 necrot\*) 13  
 34 #11 #1 or #2 or #3 or #4 or #5 or #6 or #7 or #8 or #9 or #10 867  
 35 #12 MeSH descriptor: [Glucocorticoids] explode all trees 4445  
 36 #13 MeSH descriptor: [Prednisolone] explode all trees 4804  
 37 #14 MeSH descriptor: [Methylprednisolone] explode all trees 2679  
 38 #15 MeSH descriptor: [Prednisone] explode all trees 3909  
 39 #16 MeSH descriptor: [Adrenal Cortex Hormones] explode all trees 14135  
 40 #17 corticosteroid\* or glucocorticoid\* or methylprednisolon\* or prednison\* or  
 41 prednisolon\* 41757  
 42 #18 MeSH descriptor: [Corticosterone] explode all trees 38  
 43 #19 MeSH descriptor: [Hydrocortisone] explode all trees 5886  
 44 #20 MeSH descriptor: [Cortisone] explode all trees 143  
 45 #21 MeSH descriptor: [Steroids] explode all trees 57500  
 46 #22 MeSH descriptor: [Cortodoxone] explode all trees 30  
 47 #23 MeSH descriptor: [Cortodoxone] explode all trees 30  
 48 #24 MeSH descriptor: [Hydroxycorticosteroids] explode all trees 7002  
 49 #25 MeSH descriptor: [Dexamethasone] explode all trees 4409  
 50  
 51  
 52  
 53  
 54  
 55  
 56  
 57  
 58  
 59  
 60



1  
2  
3  
4  
5  
6  
7  
8  
9  
10  
11  
12  
13  
14  
15  
16  
17  
18  
19  
20  
21  
22  
23  
24  
25  
26  
27  
28  
29  
30  
31  
32  
33  
34  
35  
36  
37  
38  
39  
40  
41  
42  
43  
44  
45  
46  
47  
48  
49  
50  
51  
52  
53  
54  
55  
56  
57  
58  
59  
60

#26 corticosteron\* or hydrocortison or cortison\* or steroids or cortodoxon\* or  
hydroxycorticosteroid\* or dexamethason\* or adrenocorticosteroid\* or  
adrenocorticoid\* or corticoid\* 22688  
#27 #12 or #13 or #14 or #15 or #16 or #17 or #18 or #19 or #20 or #21 or #22  
or #23 or #24 or #25 or #26 95898  
#28 #11 and #27 in Trials 377

For peer review only

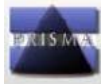

# PRISMA 2009 Checklist

1  
2  
3  
4  
5  
6  
7  
8  
9  
10  
11  
12  
13  
14  
15  
16  
17  
18  
19  
20  
21  
22  
23  
24  
25  
26  
27  
28  
29  
30  
31  
32  
33  
34  
35  
36  
37  
38  
39  
40  
41  
42  
43  
44  
45  
46  
47

| Section/topic                      | #  | Checklist item                                                                                                                                                                                                                                                                                              | Reported on page # |
|------------------------------------|----|-------------------------------------------------------------------------------------------------------------------------------------------------------------------------------------------------------------------------------------------------------------------------------------------------------------|--------------------|
| <b>TITLE</b>                       |    |                                                                                                                                                                                                                                                                                                             |                    |
| Title                              | 1  | Identify the report as a systematic review, meta-analysis, or both.                                                                                                                                                                                                                                         | 1                  |
| <b>ABSTRACT</b>                    |    |                                                                                                                                                                                                                                                                                                             |                    |
| Structured summary                 | 2  | Provide a structured summary including, as applicable: background; objectives; data sources; study eligibility criteria, participants, and interventions; study appraisal and synthesis methods; results; limitations; conclusions and implications of key findings; systematic review registration number. | 3-4                |
| <b>INTRODUCTION</b>                |    |                                                                                                                                                                                                                                                                                                             |                    |
| Rationale                          | 3  | Describe the rationale for the review in the context of what is already known.                                                                                                                                                                                                                              | 6-7                |
| Objectives                         | 4  | Provide an explicit statement of questions being addressed with reference to participants, interventions, comparisons, outcomes, and study design (PICOS).                                                                                                                                                  | 6-7                |
| <b>METHODS</b>                     |    |                                                                                                                                                                                                                                                                                                             |                    |
| Protocol and registration          | 5  | Indicate if a review protocol exists, if and where it can be accessed (e.g., Web address), and, if available, provide registration information including registration number.                                                                                                                               | 7                  |
| Eligibility criteria               | 6  | Specify study characteristics (e.g., PICOS, length of follow-up) and report characteristics (e.g., years considered, language, publication status) used as criteria for eligibility, giving rationale.                                                                                                      | 8                  |
| Information sources                | 7  | Describe all information sources (e.g., databases with dates of coverage, contact with study authors to identify additional studies) in the search and date last searched.                                                                                                                                  | 8                  |
| Search                             | 8  | Present full electronic search strategy for at least one database, including any limits used, such that it could be repeated.                                                                                                                                                                               | 8                  |
| Study selection                    | 9  | State the process for selecting studies (i.e., screening, eligibility, included in systematic review, and, if applicable, included in the meta-analysis).                                                                                                                                                   | 8                  |
| Data collection process            | 10 | Describe method of data extraction from reports (e.g., piloted forms, independently, in duplicate) and any processes for obtaining and confirming data from investigators.                                                                                                                                  | 9                  |
| Data items                         | 11 | List and define all variables for which data were sought (e.g., PICOS, funding sources) and any assumptions and simplifications made.                                                                                                                                                                       | 9                  |
| Risk of bias in individual studies | 12 | Describe methods used for assessing risk of bias of individual studies (including specification of whether this was done at the study or outcome level), and how this information is to be used in any data synthesis.                                                                                      | 9                  |
| Summary measures                   | 13 | State the principal summary measures (e.g., risk ratio, difference in means).                                                                                                                                                                                                                               | 9-10               |
| Synthesis of results               | 14 | Describe the methods of handling data and combining results of studies, if done, including measures of consistency (e.g., $I^2$ ) for each meta-analysis.                                                                                                                                                   | 9-10               |

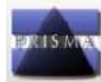

# PRISMA 2009 Checklist

Page 1 of 2

| Section/topic                 | #  | Checklist item                                                                                                                                                                                           | Reported on page # |
|-------------------------------|----|----------------------------------------------------------------------------------------------------------------------------------------------------------------------------------------------------------|--------------------|
| Risk of bias across studies   | 15 | Specify any assessment of risk of bias that may affect the cumulative evidence (e.g., publication bias, selective reporting within studies).                                                             | 9-10               |
| Additional analyses           | 16 | Describe methods of additional analyses (e.g., sensitivity or subgroup analyses, meta-regression), if done, indicating which were pre-specified.                                                         | 9-10               |
| <b>RESULTS</b>                |    |                                                                                                                                                                                                          |                    |
| Study selection               | 17 | Give numbers of studies screened, assessed for eligibility, and included in the review, with reasons for exclusions at each stage, ideally with a flow diagram.                                          | 10                 |
| Study characteristics         | 18 | For each study, present characteristics for which data were extracted (e.g., study size, PICOS, follow-up period) and provide the citations.                                                             | 10-11              |
| Risk of bias within studies   | 19 | Present data on risk of bias of each study and, if available, any outcome level assessment (see item 12).                                                                                                | 12                 |
| Results of individual studies | 20 | For all outcomes considered (benefits or harms), present, for each study: (a) simple summary data for each intervention group (b) effect estimates and confidence intervals, ideally with a forest plot. | 11-12              |
| Synthesis of results          | 21 | Present results of each meta-analysis done, including confidence intervals and measures of consistency.                                                                                                  | 13-15              |
| Risk of bias across studies   | 22 | Present results of any assessment of risk of bias across studies (see Item 15).                                                                                                                          | 12                 |
| Additional analysis           | 23 | Give results of additional analyses, if done (e.g., sensitivity or subgroup analyses, meta-regression [see Item 16]).                                                                                    | 13-15              |
| <b>DISCUSSION</b>             |    |                                                                                                                                                                                                          |                    |
| Summary of evidence           | 24 | Summarize the main findings including the strength of evidence for each main outcome; consider their relevance to key groups (e.g., healthcare providers, users, and policy makers).                     | 16-17              |
| Limitations                   | 25 | Discuss limitations at study and outcome level (e.g., risk of bias), and at review-level (e.g., incomplete retrieval of identified research, reporting bias).                                            | 18                 |
| Conclusions                   | 26 | Provide a general interpretation of the results in the context of other evidence, and implications for future research.                                                                                  | 18                 |
| <b>FUNDING</b>                |    |                                                                                                                                                                                                          |                    |
| Funding                       | 27 | Describe sources of funding for the systematic review and other support (e.g., supply of data); role of funders for the systematic review.                                                               | 19                 |

From: Moher D, Liberati A, Tetzlaff J, Altman DG, The PRISMA Group (2009). Preferred Reporting Items for Systematic Reviews and Meta-Analyses: The PRISMA Statement. PLoS Med 6(7): e1000097. doi:10.1371/journal.pmed1000097

For more information, visit: [www.prisma-statement.org](http://www.prisma-statement.org).

Page 2 of 2

For peer review only - <http://bmjopen.bmj.com/site/about/guidelines.xhtml>

# BMJ Open

## The comparative efficacy and safety of alternative glucocorticoids regimens in patients with ANCA-associated vasculitis: A systematic review

|                                 |                                                                                                                                                                                                                                                                                                                                                                                                                                                                                                                                                                                                                                                                                                                                                                                                                                                                                                                                                                                                                                                                                                                                                                                                                                                                                                                                                                                                                                                                                                                                                                                                                                                                                                                    |
|---------------------------------|--------------------------------------------------------------------------------------------------------------------------------------------------------------------------------------------------------------------------------------------------------------------------------------------------------------------------------------------------------------------------------------------------------------------------------------------------------------------------------------------------------------------------------------------------------------------------------------------------------------------------------------------------------------------------------------------------------------------------------------------------------------------------------------------------------------------------------------------------------------------------------------------------------------------------------------------------------------------------------------------------------------------------------------------------------------------------------------------------------------------------------------------------------------------------------------------------------------------------------------------------------------------------------------------------------------------------------------------------------------------------------------------------------------------------------------------------------------------------------------------------------------------------------------------------------------------------------------------------------------------------------------------------------------------------------------------------------------------|
| Journal:                        | <i>BMJ Open</i>                                                                                                                                                                                                                                                                                                                                                                                                                                                                                                                                                                                                                                                                                                                                                                                                                                                                                                                                                                                                                                                                                                                                                                                                                                                                                                                                                                                                                                                                                                                                                                                                                                                                                                    |
| Manuscript ID                   | bmjopen-2021-050507.R1                                                                                                                                                                                                                                                                                                                                                                                                                                                                                                                                                                                                                                                                                                                                                                                                                                                                                                                                                                                                                                                                                                                                                                                                                                                                                                                                                                                                                                                                                                                                                                                                                                                                                             |
| Article Type:                   | Original research                                                                                                                                                                                                                                                                                                                                                                                                                                                                                                                                                                                                                                                                                                                                                                                                                                                                                                                                                                                                                                                                                                                                                                                                                                                                                                                                                                                                                                                                                                                                                                                                                                                                                                  |
| Date Submitted by the Author:   | 28-Aug-2021                                                                                                                                                                                                                                                                                                                                                                                                                                                                                                                                                                                                                                                                                                                                                                                                                                                                                                                                                                                                                                                                                                                                                                                                                                                                                                                                                                                                                                                                                                                                                                                                                                                                                                        |
| Complete List of Authors:       | <p>xiao, yingqi; McMaster University, Department of Health Research Methods, Evidence and Impact; Sichuan University, West China School of Nursing / Department of Nursing, West China Hospital</p> <p>Guyatt, Gordon; McMaster University, Department of Health Research Methods, Evidence and Impact; McMaster University, Department of Medicine</p> <p>Zeng, Linan; McMaster University, Department of Health Research Methods, Evidence, and Impact; Sichuan University, Pharmacy Department/Evidence-based Pharmacy Center, West China Second University Hospital</p> <p>Jayne, David; University of Cambridge, Department of Medicine</p> <p>Merkel, PA; University of Pennsylvania, Division of Rheumatology, Department of Medicine and Division of Clinical Epidemiology, Department of Biostatistics, Epidemiology and Informatics</p> <p>Siemieniuk, Reed; McMaster University, Department of Health Research Methods, Evidence, and Impact; McMaster University, Ontario, Canada., Department of Medicine</p> <p>Dookie, Jared E ; Western University, Schulich School of Medicine and Dentistry</p> <p>A Buchan, Tayler ; McMaster University, Department of Health Research Methods, Evidence and Impact</p> <p>Ahmed, Muhammad Muneeb; McMaster University, Hamilton, Ontario, Canada., Michael G. DeGroote School of Medicine</p> <p>Couban, Rachel; McMaster University, DeGroote Institute for Pain Research and Care</p> <p>Mahr, Alfred ; Kantonsspital St Gallen, St Gallen, Switzerland., Clinic for Rheumatology</p> <p>Walsh, Michael; McMaster University, Department of Health Research Methods, Evidence and Impact; McMaster University, Ontario, Canada., Department of Medicine</p> |
| <b>Primary Subject Heading</b>: | Cardiovascular medicine                                                                                                                                                                                                                                                                                                                                                                                                                                                                                                                                                                                                                                                                                                                                                                                                                                                                                                                                                                                                                                                                                                                                                                                                                                                                                                                                                                                                                                                                                                                                                                                                                                                                                            |
| Secondary Subject Heading:      | Haematology (incl blood transfusion), Evidence based practice                                                                                                                                                                                                                                                                                                                                                                                                                                                                                                                                                                                                                                                                                                                                                                                                                                                                                                                                                                                                                                                                                                                                                                                                                                                                                                                                                                                                                                                                                                                                                                                                                                                      |
| Keywords:                       | HAEMATOLOGY, ORAL MEDICINE, Clinical trials < THERAPEUTICS                                                                                                                                                                                                                                                                                                                                                                                                                                                                                                                                                                                                                                                                                                                                                                                                                                                                                                                                                                                                                                                                                                                                                                                                                                                                                                                                                                                                                                                                                                                                                                                                                                                         |
|                                 |                                                                                                                                                                                                                                                                                                                                                                                                                                                                                                                                                                                                                                                                                                                                                                                                                                                                                                                                                                                                                                                                                                                                                                                                                                                                                                                                                                                                                                                                                                                                                                                                                                                                                                                    |

1  
2  
3  
4  
5  
6  
7  
8  
9  
10  
11  
12  
13  
14  
15  
16  
17  
18  
19  
20  
21  
22  
23  
24  
25  
26  
27  
28  
29  
30  
31  
32  
33  
34  
35  
36  
37  
38  
39  
40  
41  
42  
43  
44  
45  
46  
47  
48  
49  
50  
51  
52  
53  
54  
55  
56  
57  
58  
59  
60

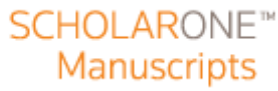



I, the Submitting Author has the right to grant and does grant on behalf of all authors of the Work (as defined in the below author licence), an exclusive licence and/or a non-exclusive licence for contributions from authors who are: i) UK Crown employees; ii) where BMJ has agreed a CC-BY licence shall apply, and/or iii) in accordance with the terms applicable for US Federal Government officers or employees acting as part of their official duties; on a worldwide, perpetual, irrevocable, royalty-free basis to BMJ Publishing Group Ltd ("BMJ") its licensees and where the relevant Journal is co-owned by BMJ to the co-owners of the Journal, to publish the Work in this journal and any other BMJ products and to exploit all rights, as set out in our [licence](#).

The Submitting Author accepts and understands that any supply made under these terms is made by BMJ to the Submitting Author unless you are acting as an employee on behalf of your employer or a postgraduate student of an affiliated institution which is paying any applicable article publishing charge ("APC") for Open Access articles. Where the Submitting Author wishes to make the Work available on an Open Access basis (and intends to pay the relevant APC), the terms of reuse of such Open Access shall be governed by a Creative Commons licence – details of these licences and which [Creative Commons](#) licence will apply to this Work are set out in our licence referred to above.

Other than as permitted in any relevant BMJ Author's Self Archiving Policies, I confirm this Work has not been accepted for publication elsewhere, is not being considered for publication elsewhere and does not duplicate material already published. I confirm all authors consent to publication of this Work and authorise the granting of this licence.

1  
2  
3 **The comparative efficacy and safety of alternative glucocorticoids regimens in**  
4 **patients with ANCA-associated vasculitis: A systematic review**  
5  
6

7 Yingqi Xiao<sup>1,2</sup>, PhD , reviewer, methodologist, Gordon H Guyatt<sup>1,3</sup>, MD, professor,  
8 methodologist, Linan Zeng<sup>1,4</sup>, PhD, methodologist, David RW Jayne<sup>5</sup>, MD,  
9 nephrologist, Peter A Merkel<sup>6</sup>, MD, MPH, rheumatologist, Reed AC Siemieniuk<sup>1,3</sup>,  
10 MD, methodologist, Jared E Dookie<sup>7</sup>, B.Sc, MD student, reviewer, Tayler A Buchan<sup>1</sup>,  
11 MSc, Graduate student, reviewer, Muhammad M Ahmed<sup>8</sup>, BHSc, MD , reviewer,  
12 Rachel J Couban<sup>9</sup>, information specialist, Alfred Mahr<sup>10</sup>, MD, rheumatologist,  
13 Michael Walsh<sup>1,3,11</sup>, MD, nephrologist  
14  
15  
16  
17  
18  
19

20 1 Department of Health Research Methods, Evidence and Impact, McMaster  
21 University, Ontario, Canada.  
22

23  
24 2 West China School of Nursing / Department of Nursing, West China Hospital,  
25 Sichuan University, China.  
26

27  
28 3 Department of Medicine, McMaster University, Ontario, Canada.  
29

30  
31 4 Pharmacy Department/Evidence-based Pharmacy Center, West China Second  
32 University Hospital, Sichuan University, China.  
33

34  
35 5 Department of Medicine, University of Cambridge, Cambridge, United Kingdom.  
36

37  
38 6 Division of Rheumatology, Department of Medicine and Division of Clinical  
39 Epidemiology, Department of Biostatistics, Epidemiology and Informatics, University  
40 of Pennsylvania, Philadelphia, USA.  
41

42  
43 7 Schulich School of Medicine and Dentistry, Western University, Ontario, Canada.  
44

45  
46 8 Michael G. DeGroote School of Medicine, McMaster University, Hamilton,  
47 Ontario, Canada.  
48

49  
50 9 DeGroote Institute for Pain Research and Care, McMaster University, Ontario,  
51 Canada.  
52

53  
54 10 Clinic for Rheumatology, Kantonsspital St Gallen, St Gallen, Switzerland.  
55

56  
57 11 Population Health Research Institute, Hamilton Health Sciences / McMaster  
58 University, Ontario, Canada.  
59

60 Corresponding Author:

1  
2  
3 Yingqi Xiao  
4

5 West China School of Nursing  
6

7 West China Hospital  
8

9  
10 Sichuan University  
11

12 Chengdu, Sichuan, China  
13

14  
15 610041  
16

17 Email: xiaoyingqixyq@163.com  
18  
19  
20  
21  
22  
23  
24  
25  
26  
27  
28  
29  
30  
31  
32  
33  
34  
35  
36  
37  
38  
39  
40  
41  
42  
43  
44  
45  
46  
47  
48  
49  
50  
51  
52  
53  
54  
55  
56  
57  
58  
59  
60



## Abstract

### Objective

To compare the efficacy and safety of alternative glucocorticoids (GC) regimens as induction therapy for patients with antineutrophil cytoplasmic antibodies (ANCA)-associated vasculitis.

### Design

Systematic review of Randomized controlled trial (RCTs).

### Data sources

Medline, Embase, Clinicaltrials.gov and Cochrane Central Register of Controlled Trials up to 10 April 2020.

### Study selection and Review methods

RCTs comparing two (or more) different dose regimens of GC in ANCA-associated vasculitis during induction of remission, regardless of other therapies. Pairs of reviewers independently screened records, extracted data and assessed risk of bias. Two reviewers rated certainty of evidence using the Grading of Recommendations Assessment, Development, and Evaluation (GRADE) approach.

### Results

Of 3912 records identified, the full texts of two records met the eligibility criteria. Due to the heterogeneity of population and dose regimen of glucocorticoids between the two trials, we descriptively presented the two trials and did not combine the results using meta-analysis. Compared with the standard-dose regimen, the reduced-dose regimen of GC may reduce death risk difference [RD]: from -1.7% to -2.1%, low certainty), while not increasing end-stage kidney disease (ESKD) (RD: from -1.5% to 0.4%, moderate certainty). The reduced-dose regimen probably has an important reduction in serious infections at 1 year (RD: from -12.8% to -5.9%, moderate certainty). Reduced-dose regimen of glucocorticoids probably has trivial or no effect in disease remission, relapse or health related quality of life (moderate to high certainty).

### Conclusions

1  
2  
3 The reduced-dose regimen of GC may reduce death at the follow-up of 6 months to  
4 longer than 1 year and serious infections while not increase ESKD.  
5  
6

### 7 **Systematic review registration**

8  
9 PROSPERO CRD42020179087.  
10

11 **Keywords:** glucocorticoids, Anti-Neutrophil Cytoplasmic Antibody-Associated  
12 Vasculitis, systematic review  
13  
14

15  
16 Word count for the main text: 3079  
17  
18

### 19 **Strengths and limitations of this study**

- 20  
21  
22  
23 - This systematic review included a comprehensive search of literatures without  
24 limitation on language.  
25  
26 - This systematic review applied GRADE approach assessing the quality of  
27 evidence.  
28  
29 - This systematic review included the largest global trial and the latest trial on the  
30 subject so far that have improved the generalizability of the results through the  
31 efforts of national and international vasculitis networks and extensive selection  
32 criteria.  
33  
34 - Despite the excellent methodological quality, the two eligible trials were open  
35 labeled and were subject to bias.  
36  
37 - This systematic review is mainly based on evidence from patients with severe  
38 ANCA-associated vasculitis is uncertain.  
39  
40  
41  
42  
43  
44  
45  
46  
47  
48  
49  
50  
51  
52  
53  
54  
55  
56  
57  
58  
59  
60

## Introduction

ANCA-associated vasculitis (AAV) comprises a subgroup of systemic vasculitis affecting small- to medium-sized vessels, a chronic inflammatory disease of the blood vessel wall<sup>1</sup>, and includes granulomatosis with polyangiitis, microscopic polyangiitis, and eosinophilic granulomatosis with polyangiitis.<sup>2</sup> Patients with AAV usually test positive for ANCA. The cause of the disease remains unclear. Genetic and environmental factors play an important role in the onset of the disease.<sup>3,4</sup> The annual incidence of AAV is about 20 per million inhabitants, and the prevalence is about 100 per million inhabitants.<sup>5</sup> AAV has multiple clinical manifestations, characterized by leukocytes infiltrating the vessel walls, fibrinoid necrosis, and vascular damage with occlusion or aneurysm formation.<sup>6</sup> The severity of AAV varies greatly, but after months to years of non-severe manifestations, patients with non-severe diseases often progress to severe diseases.<sup>7</sup> The most common severe AAV manifestation is glomerulonephritis, which leads to renal failure and alveolar capillaritis causing pulmonary hemorrhage.<sup>8</sup> Previous studies have showed that untreated AAV is typically fatal<sup>9</sup>, with 6-month and 1-year mortality rates of 60% and 80%, respectively.<sup>10</sup>

Since the 1950s, glucocorticoids (GCs), as immunosuppressants and anti-inflammatory drugs with a fast-acting and powerful anti-inflammatory effect, became the basis of therapy for AAV.<sup>11,12</sup> The main mechanism of action is genomic and non-genomic effects mediated by cytosolic GC receptors or specific and non-specific interactions with membrane-bound GC receptors resulting in reduced production of pro-inflammatory proteins (transrepression).<sup>13</sup> However, monotherapy has incomplete efficacy.<sup>14</sup> Subsequently, standard therapy emerged using the combination of high-dose GC and cyclophosphamide to achieve remission in AAV.<sup>15,16,17</sup> This combination therapy proved to reduce mortality to 25% at 5 years and has high remission rates of 80% – 90%.<sup>18</sup> In addition to cyclophosphamide, clinical remission can also be achieved with rituximab-based or methotrexate-based therapies.<sup>19</sup> Although the combination of high-dose GC and cytotoxic drugs greatly enhances the therapeutic efficacy, high-dose GC may increase the toxicity associated with treatment. Infections and cardiovascular diseases due to the treatment are main causes

1  
2  
3 of fatal side effects that reduced quality of life (QOL) in patients.<sup>20,21</sup> Previous studies  
4 have shown that lower GC doses during the induction period were associated with  
5 higher relapse rates and longer term of GC use that might expose patients to the  
6 potential toxicity of high-cumulative GC.<sup>22,23</sup>  
7  
8  
9

10  
11  
12  
13 The purpose of this systematic review is to evaluate the comparative efficacy and  
14 safety of alternative GC regimens (two or more different doses of GC) in patients with  
15 ANCA-associated vasculitis. Our systematic review is part of a BMJ Rapid  
16 Recommendations project, which is based on the shared vision of the MAGIC  
17 Evidence Ecosystem Foundation ([www.magicproject.org](http://www.magicproject.org)) and The BMJ. When there  
18 is evidence that may change the clinical practice, the cooperative organizations will  
19 act quickly to provide a timely, trustworthy practice guideline. Under such  
20 circumstance, the exciting evidence was the PEXIVAS trial<sup>24</sup>. The systematic review  
21 informed an associated BMJ Rapid Recommendations.  
22  
23  
24  
25  
26  
27  
28  
29  
30

## 31 **Methods**

### 32 **Registration and report**

33  
34 A priori protocol of this systematic review is presented at PROSPERO  
35 (CRD42020179087). We reported this systematic review and meta-analysis based on  
36 the PRISMA (Preferred Reporting Items for Systematic Reviews and Meta-Analyses)  
37 statement (see Appendix 1).<sup>25</sup>  
38  
39  
40  
41  
42  
43  
44  
45  
46

### 47 **Patient and public involvement**

48  
49 According to the process of the BMJ Rapid Recommendations, the guideline panel on  
50 this target provides critical process oversight and content guidance for the systematic  
51 review. The guideline panel consisted of clinicians, methodologists, pharmacists,  
52 patient partners with AAV and caregiver partner. Patients received relevant training  
53 and support to meet patient involvement content throughout the guideline  
54 development process, , including critical feedback on outcome and subgroup  
55 selection, GRADE judgments, and manuscript feedback.  
56  
57  
58  
59  
60

## Study selection

We included studies of patients with a diagnosis of active AAV. AAV is defined as the following categories according to the Chapel Hill Consensus Conference 2012 classification method: microscopic polyangiitis (MPA), granulomatosis with polyangiitis (GPA), eosinophilic granulomatosis with polyangiitis (EGPA, Churg-Strauss syndrome).<sup>26</sup> In addition, single organ damage AAV (eg, renal limited vasculitis (RLV) or idiopathic rapidly progressive glomerulonephritis (RPGN)) can be considered the fourth entity, although in practice it eventually corresponds to the kidney-limited form of MPA or GPA.<sup>27</sup>

Eligible studies are defined as comparing two or more doses of GC in patients with AAV during induction of remission, regardless of the use of other therapies. Other therapies include, but are not limited to cyclophosphamide, azathioprine, rituximab, methotrexate, mycophenolate mofetil and plasma exchange. We included only RCTs. Outcomes of interest included death, ESKD, serious infections, serious adverse events other than serious infection, sustained remission and any other patient-important outcomes. The time point for the outcome assessment depends on what was specified in individual studies.

## Data sources and searches

A professional medical librarian developed a literature search strategy and searched Medline, Embase, Clinicaltrials.gov and Cochrane Central Register of Controlled Trials (CENTRAL) for relevant studies from the inception to 10 April 2020 with no restriction on language. Appendix 2 presents the literature search strategies and results. We also reviewed the reference lists of included studies for additional references. Pairs of reviewers (YX, JD, TB, MA) independently screened titles and abstracts, and reviewed the full texts of potentially eligible studies to determine the final eligible studies. Disagreements were resolved by discussion. To ensure the validity and consistency of the process, we provided reviewers with review instruction and conducted calibration exercises before the formal start of each process.

## Data extraction and risk of bias assessment

We collected data through a predesigned excel extraction form. Pairs of reviewers (YX, JD, TB, MA) extracted data independently. We resolved disagreements by discussion. For each eligible study, we collected the following: country/region, design of the study, patient characteristics (mean age, sex and disease diagnosis), treatment strategy, outcomes and measures, and follow-up duration. Pair of reviewers (YX, JD, TB, MA) independently assessed the risk of bias of each RCT using a revised Cochrane risk of bias tool that includes sequence generation, concealment of allocation, blinding (participants, personnel, and outcome assessors), loss to follow-up, selective outcome reporting and other potential sources of bias.<sup>28</sup> The reviewers judged each criterion as definitely or probably low risk of bias, or probably or definitely high risk of bias.

## Data synthesis or analysis, and grading of evidence

If data permitted, we planned to conduct meta-analysis for each of the outcomes. For continuous outcomes, we planned to use inverse variance statistical method to calculate mean difference (MD) and 95% confidence interval (CI). For binary outcomes, we would use the Mantel–Haenszel statistical method to calculate risk ratio (RR) and 95% CI. We planned to conservatively use a priori random effects model assuming a great variability in treatment effects across the study. We planned to use the  $I^2$  statistic to assess statistical heterogeneity. And when the effect-estimated  $I^2$  value is >30%, we would attempt to determine the reason for the heterogeneity. Subgroups would depend on the outcomes of the included studies report. We planned to check the funnel plot for potential publication bias if the number of eligible studies in the analysis exceeded ten. We set significance at  $P=0.05$  and would use RevMan version 5.3 for all statistical analyses.

We used the GRADE approach<sup>29</sup> to assess the quality of evidence at outcome level by two reviewers (LZ and YX). We focused on the grading of the following outcomes after our team discussion: death, ESKD, serious infections at one year, serious adverse

1  
2  
3 events, and health-related quality of life. Disagreements were resolved by discussion  
4 or through a third reviewer (GHG) adjudication. Randomized controlled trials started  
5 as high quality. We summarized the quality of evidence in GRADE summary of  
6 findings using the MAGICapp platform.<sup>30,31</sup>  
7  
8  
9

## 10 11 12 13 **Results**

### 14 15 **Literature search**

16  
17 The search yielded, after removal of duplicates, 3912 records, 38 of which were  
18 considered for full-text review. The PRISMA flow chart (Figure 1), presents the  
19 reasons for excluding studies at the stage of full text screening. Ultimately, two RCTs  
20 met the inclusion criteria.<sup>18,24</sup> The full text of one of the two RCTs<sup>18</sup> was published  
21 after our initial submission of this systematic review. We updated our results after the  
22 full text was published.  
23  
24  
25  
26  
27  
28  
29  
30

### 31 32 **Included studies**

33  
34 The RCT by Walsh et al<sup>24</sup> was a multicenter trial including 704 patients with severe  
35 AAV at 95 centers in 16 countries (median duration of follow-up 2.9 years). This  
36 study was a 2-by-2 factorial design and compared the efficacy of plasma exchange  
37 with or without plasma exchange for AAV, as well as the efficacy of a reduced-dose  
38 regimen and a standard-dose regimen of GC over the first 6 months of the treatment  
39 period. The two regimens of oral GC, specifically, patients in the reduced-dose  
40 regimen and standard-dose regimen received the same treatment in the first week —  
41 the dose was determined according to the patients' weight (50.0 mg/<50 kg, 60.0  
42 mg/50 to 75 kg, 75.0 mg/> 75 kg). The reduced-dose regimen and the standard-dose  
43 regimen began to decrease gradually in the second and third weeks, respectively.  
44 Finally, at 6th months, the cumulative dose of oral GC in the reduced-dose regimen  
45 was less than 60% of the standard-dose regimen. (Table 1)  
46  
47  
48  
49  
50  
51  
52  
53  
54  
55  
56  
57

58 The RCT by Furuta et al<sup>18</sup> was a multicenter trial enrolling 140 patients with newly  
59 diagnosed AAV at 34 centers in Japan (with a follow-up of 6 months). This trial  
60

1  
2  
3 evaluated whether a low-dose GC regimen (initial dose at 0.5 mg/kg/day) is non-  
4 inferior to a high-dose regimen (initial dose at 1.0 mg/kg/day) in efficacy when  
5 combined with rituximab for the treatment of AAV. In the low-dose group,  
6 prednisolone was discontinued at 5 months, while in the high-dose group,  
7 prednisolone was reduced to 10.0 mg/ day until 6 months. (Table 1)  
8  
9  
10  
11  
12  
13  
14  
15  
16  
17  
18  
19  
20  
21  
22  
23  
24  
25  
26  
27  
28  
29  
30  
31  
32  
33  
34  
35  
36  
37  
38  
39  
40  
41  
42  
43  
44  
45  
46  
47  
48  
49  
50  
51  
52  
53  
54  
55  
56  
57  
58  
59  
60

For peer review only



1  
2  
3  
4  
5  
6  
7  
8  
9  
10  
11  
12  
13  
14  
15  
16  
17  
18  
19  
20  
21  
22  
23  
24  
25  
26  
27  
28  
29  
30  
31  
32  
33  
34  
35  
36  
37  
38  
39  
40  
41  
42  
43  
44  
45  
46

**Table 1: Characteristics of studies originally planned to be included**

| Author, Year                       | Name of the study (ClinicalTrials.gov number) | Country             | Study design                                    | Intervention and comparison (No. of patients) *                                                                                                                                                       | Patients                                                           | Outcomes                                                                                                                                                                                                                                |
|------------------------------------|-----------------------------------------------|---------------------|-------------------------------------------------|-------------------------------------------------------------------------------------------------------------------------------------------------------------------------------------------------------|--------------------------------------------------------------------|-----------------------------------------------------------------------------------------------------------------------------------------------------------------------------------------------------------------------------------------|
| Walsh et al. (2020) <sup>24</sup>  | PEXIVAS (NCT00987389)                         | Multiple countries  | Phase III, randomized, open label, 704 patients | Intervention: reduced-dose GC therapy (initial dose : 50-75mg; maintenance dose continues at 5mg/day from the end of week 23 until at least week 52; accumulative dose less than 60% of the standard) | 353 patients with severe AAV (mean age 63 years, 44% female)       | Primary outcome: a composite of death from any cause or ESKD.<br><br>Secondary outcomes: death from any cause, ESKD, sustained remission, serious adverse events, serious infections within 1 year, and health-related quality of life. |
|                                    |                                               |                     |                                                 | Comparison: standard-dose GC therapy (initial dose : 50-75mg; maintenance dose continues at 5mg/day from the end of week 23 until at least week 52)                                                   | 351 patients with severe AAV (mean age 63 years, 43% female)       |                                                                                                                                                                                                                                         |
| Furuta et al. (2021) <sup>18</sup> | LoVAS ( NCT02198248)                          | Japan, multicentric | Phase IV, randomized, open label, 140 patients  | Intervention : low-dose GC treatment (initial dose : 0.5mg/kg/day; discontinued at 5 months)                                                                                                          | 70 patients with new diagnosis of AAV (median age: 73; 43% female) | Primary outcome: remission rate at 6 months.<br><br>Secondary outcomes: time to remission, death, relapse, ESKD and the first serious adverse event, proportion of death, relapse and ESKD                                              |

|  |  |  |  |                                                                                                  |                                                                    |                           |
|--|--|--|--|--------------------------------------------------------------------------------------------------|--------------------------------------------------------------------|---------------------------|
|  |  |  |  | Comparison : high-dose GC treatment (initial dose : 1mg/kg/day; reduced to 10mg/day by 5 months) | 70 patients with new diagnosis of AAV (median age: 74; 37% female) | for efficacy at 6 months. |
|--|--|--|--|--------------------------------------------------------------------------------------------------|--------------------------------------------------------------------|---------------------------|

\* : Although these two trials are comparisons of different doses of glucocorticoids, the regimens are different, and the details are in the text.

AAV: antineutrophil cytoplasmic antibodies associated vasculitis; Gcs: glucocorticoids. ESKD: end-stage kidney disease.

For peer review only

1  
2  
3  
4  
5  
6  
7  
8  
9  
10  
11  
12  
13  
14  
15  
16  
17  
18  
19  
20  
21  
22  
23  
24  
25  
26  
27  
28  
29  
30  
31  
32  
33  
34  
35  
36  
37  
38  
39  
40  
41  
42  
43  
44  
45  
46

### **Risk of bias**

Both trials were open-label trials and patients and investigators were aware of the group assignments due to the complexity of the GC regimen. However, the recorded treatment adherence, lack of available co-interventions, and objective, easily ascertained nature of the outcomes, the lack of blinding may have introduced minimal bias. Considering the low risk of bias in the other domains this trial, both trials were at low overall risk of bias (Appendix 3).

### **Effect of Interventions**

Due to the heterogeneity in the population and in the regimens of glucocorticoids between the two trials, we descriptively presented the two trials and did not combine the results using meta-analysis. Since the results of the Walsh's study<sup>24</sup> showed no interaction between the GC regimen and the plasma exchange, we only focus on the use of GC in conjunction with the purpose of this review.

Appendix 4 summarizes the GRADE summary of findings for these two trials. Compared with standard-dose regimen, reduced-dose regimen of GC may reduce death (risk difference [RD]: from -1.7% to -2.1%, low certainty), while not increasing ESKD (RD: from -1.5% to 0.4%, moderate certainty). Results showed that the rate of serious infection at 6 months to 1 year in the reduced-dose regimen tended to be lower than in the standard-dose regimen (RD: from -12.8% to -5.9%, moderate certainty). As one trial showed reduced-dose regimen might increase the risk of serious adverse events (RD: 3.1%, 95% CI -3.7% to 11.2%) while another trial showed reduced-dose regimen might reduce the risk (RD: -18.1%, 95% CI -33% to 3.2%), we are uncertain about the effect of reduced-dose regimen on serious effect (Very low certainty). Reduced-dose regimen of glucocorticoids probably has trivial or no effect in disease remission, relapse or health related quality of life (Moderate to high certainty).

## Discussion

After full text screening, we identified 2 studies<sup>18,24</sup> involving 844 patients that met our selection criteria for studies comparing different doses regimens of GC for the treatment of AAV. According to this systematic review, the results of the absolute effects of low certainty of evidence showed that reduced-dose regimen of GC may reduce death at a follow-up from 6 months to longer than 1 year, while not increasing the rate of ESKD (moderate certainty) among patients with AAV when compared with standard-dose regimen. However, due to the wide CIs, the absolute effects of any intervention on these two outcomes were minimal, and the results were not significantly different. This may be due to the fact that the improvement of the disease by other treatments may mask the benefits of reduced-doses regimen.

In addition, relative to the standard-dose regimen, moderate certainty of evidence indicated that the reduced-dose regimen probably has an important reduction in serious infections at 6 months to 1 year (moderate certainty) This study showed that reduced-dose regimen does have an obvious advantage in reducing infections, which echoes previous studies.<sup>17,32</sup> For example, Jayne et al. reported that when high-dose GC was used, infection was most common in the first 6 months of treating severe renal vasculitis.<sup>17</sup> Therefore, considering that the most common cause of death more than one year after diagnosis of AAV is infection or uncontrolled vasculitis,<sup>16,33,34,35</sup> this is particularly important to support the practice of the conclusion of this study.

We are, however, uncertainty about the effect of the reduced dose regimen on other serious adverse events. While Furuta et al's trial showed a significant reduction in serious adverse events by reduced-dose regimen,<sup>18</sup> Walsh et al's trial showed the reduced-dose regimen might increase the risk with a wide CI.<sup>24</sup> In Walsh et al's trial, although the reduced-dose regimen group had more renal/urinary adverse events than the standard-dose regimen, there was no significant difference in the incidence of ESKD between the two regimen groups as described above. This may be related to the treatment status of the included patients. Among the patients included in the study, the number of patients in the standard-dose regimen who had undergone dialysis before the start of the trial was more than that in the reduced-dose regimen.

1  
2  
3  
4  
5  
6 The use of GC transformed AAV from an almost uniformly fatal condition to one  
7 characterized by remissions and relapses complicated by drug-induced adverse events.  
8  
9 Despite the ubiquitous use of GC for AAV, there was no standardization of dose  
10 regimens, guidelines were ambiguous and practice patterns varied substantially. The  
11 two trials <sup>18,24</sup> supported the important role GC plays in causing adverse events and  
12 highlights the need to optimize their use. Although the two trials found evidence to  
13 support one regimen of GC over another, further research is needed to determine  
14 whether the GC regimen can be further improved for the treatment of AAV.  
15  
16  
17  
18  
19  
20  
21

22 The advantages of this systematic review include a comprehensive search of emerging  
23 and past evidence across databases without being restricted by study design or  
24 publication language, and the use of GRADE approach to assess the quality of  
25 evidence. Decisions regarding eligible studies, data extraction, and risk of bias  
26 assessments were all performed in duplicate, and calibration exercises were conducted  
27 before the formal start of the project. By excluding non-RCT studies, we limited the  
28 risk of bias. The RCTs we included are of sound methodological quality. AAV is a  
29 rare disease, and the PEXIVAS trial is the largest global trial on the subject so far  
30 which has improved the generalizability of the results through the efforts of national  
31 and international vasculitis networks and extensive selection criteria.  
32  
33  
34  
35  
36  
37  
38  
39  
40  
41  
42

43 The results of our systematic review also have some limitations. First, only two trials  
44 were included and although they were broadly inclusive and contained more events  
45 than any other trial in this disease, the total statistical information remains low. This is  
46 particularly obvious for serious adverse events other than serious infection. However,  
47 the reduced-dose GC regimen should not result in more treatment related adverse  
48 events (i.e. it is illogical that a lower exposure to GC would have anything but the  
49 same or lower rate of GC caused side effects) and there is reasonable precision around  
50 the efficacy outcomes. This limitation is expected to result in an underappreciation of  
51 the benefits of reducing the GC dose, a limitation that is supported by observational  
52 studies of GC which suggest reducing GC exposure may also reduce fractures, peptic  
53 ulcer disease, psychiatric disease, weight gain and dysglycemia. In addition, despite  
54  
55  
56  
57  
58  
59  
60

1  
2  
3 the excellent methodological quality of the included trial, this is an open label and is  
4 subject to biases despite our relative confidence that differential treatment or outcome  
5 ascertainment was at low risk. Despite the large scale of this study for a rare disease,  
6 the degree to which the results can be generalized to patients with non-severe AAV is  
7 uncertain, although it is likely safer to extrapolate the safety of the regimen from more  
8 severe illness to less severe illness rather than less severe to more severe.  
9  
10  
11  
12  
13  
14  
15  
16

## 17 **Conclusion**

18  
19 An important general rule is that in routine clinical practice, the use of conventional  
20 GC should be “as much as necessary, but as little as possible.”<sup>36</sup> Therefore, compared  
21 with the standard-dose regimen, the reduced-dose regimen of GC may reduce death,  
22 probably has little or no effect on ESKD among patients with AAV, and resulted in a  
23 lower risk of serious infections at 6 months to 1 year. Future clinical trials should  
24 evaluate whether GC dosing can be further safely reduced.  
25  
26  
27  
28  
29  
30  
31

32 Acknowledgements: We thank members of the Rapid Recommendations panel for  
33 critical feedback on outcome and subgroup selection, GRADE judgments, and  
34 manuscript feedback.  
35  
36  
37

38 Contributors: MW, AM, DJ, PM and GHG conceived of the study idea. RC  
39 performed the literature search. YX, JD, TB and MA performed the screening, data  
40 abstraction, and risk of bias assessments. YX, LZ and MW performed the data  
41 analysis. YX, GHG, LZ, RS, DJ, PM and MW interpreted the data. YX, GHG and LZ  
42 performed the certainty assessment. YX, GHG, LZ and MW drafted the manuscript.  
43 All authors critically revised the manuscript. All authors approved the final version of  
44 the manuscript. YX and MW had full access to the data in the study and takes  
45 responsibility for the integrity of the data and the accuracy of the data analysis. YX  
46 and MW are the guarantors.  
47  
48  
49  
50  
51  
52  
53

54 Funding: This work was supported by China Scholarship Council grant number  
55 201906240082.  
56  
57

58 Competing Interests: There are no competing interests for any author.

59 Ethical approval statement: Not required.  
60

1  
2  
3 Patient consent statement: Not required.

4  
5 Provenance and peer review statement: Not commissioned; externally peer reviewed.

6  
7 Data sharing statement: No data are available.

8  
9 Transparency statement: YX and MW affirm that the manuscript is an honest,  
10 accurate, and transparent account of the recommendation being reported; that no  
11 important aspects of the recommendation have been omitted; and that any  
12 discrepancies from the recommendation as planned (and, if relevant, registered) have  
13 been explained.  
14  
15  
16  
17  
18  
19

## 20 21 22 **References**

- 23 1. Houben E, Penne EL, Voskuyl AE, et al.. Cardiovascular events in anti-neutrophil cytoplasmic  
24 antibody-associated vasculitis: a meta-analysis of observational studies. *Rheumatology (Oxford)*  
25 2018;57(3):555-562.
- 26 2. Bosch X, Guilabert A, Font J. Antineutrophil cytoplasmic antibodies. *Lancet* 2006;368(9533):404-  
27 41816876669.
- 28 3. Wallace ZS, Miloslavsky EM. Management of ANCA associated vasculitis. *BMJ* 2020;368:m421.
- 29 4. Jennette JC, Falk RJ. Pathogenesis of antineutrophil cytoplasmic autoantibody-mediated disease. *Nat*  
30 *Rev Rheumatol* 2014;10:463-73.
- 31 5. Salvador F. ANCA Associated Vasculitis. *Eur J Intern Med* 2020;74:18-28.
- 32 6. Smith RM. Update on the treatment of ANCA associated vasculitis. *Presse Med* 2015;44(6 Pt  
33 2):e241-9.
- 34 7. Hoffman GS, Kerr GS, Leavitt RY, et al. Wegener granulomatosis: an analysis of 158 patients. *Ann*  
35 *Intern Med* 1992;116:488-98.
- 36 8. Walsh M, Merkel PA, Peh CA, et al.; PEXIVAS Investigators. Plasma exchange and glucocorticoid  
37 dosing in the treatment of anti-neutrophil cytoplasm antibody associated vasculitis (PEXIVAS):  
38 protocol for a randomized controlled trial. *Trials* 2013;14:73.
- 39 9. Keller SF, Miloslavsky EM. Corticosteroids in Antineutrophil Cytoplasmic Antibody-Associated  
40 Vasculitis. *Rheum Dis Clin North Am* 2016;42(1):91-101.
- 41 10. Booth AD, Almond MK, Burns A, et al., Pan-Thames Renal Research Group. Outcome of ANCA-  
42 associated renal vasculitis: a 5-year retrospective study. *Am J Kidney Dis* 2003; 41(4):776-84.
- 43 11. Jennette JC, Falk RJ. Small-vessel vasculitis. *N Engl J Med* 1997;337(21):1512–23.
- 44 12. Lally L, Spiera R. Current landscape of antineutrophil cytoplasmic antibody-associated vasculitis:  
45 classification, diagnosis, and treatment. *Rheum Dis Clin North Am* 2015;41(1):1–19, vii.
- 46 13. Stahn C, Buttgerit F. Genomic and nongenomic effects of glucocorticoids. *Nat Clin Pract*  
47 *Rheumatol* 2008;4:525-33.
- 48 14. Walton EW. Giant-cell granuloma of the respiratory tract (Wegener' s granulomatosis). *Br Med J*  
49 1958;2:265-70.
- 50 15. de Groot K , Harper L , Jayne DR , et al . Pulse versus daily oral cyclophosphamide for induction of  
51  
52  
53  
54  
55  
56  
57  
58  
59  
60

- 1  
2  
3 remission in antineutrophil cytoplasmic antibody-associated vasculitis: a randomized trial. *Ann Intern*  
4 *Med* 2009;150:670–80.
- 5  
6 16. De Groot K , Rasmussen N , Bacon PA , et al . Randomized trial of cyclophosphamide versus  
7 methotrexate for induction of remission in early systemic antineutrophil cytoplasmic antibody-  
8 associated vasculitis. *Arthritis Rheum* 2005;52:2461–9.
- 9  
10 17. Jayne DR , Gaskin G , Rasmussen N , et al . Randomized trial of plasma exchange or high-dosage  
11 methylprednisolone as adjunctive therapy for severe renal vasculitis. *J Am Soc Nephrol* 2007;18:2180–  
12 8.
- 13  
14 18. Furuta S, Nakagomi D, Kobayashi Y, et al. Effect of Reduced-Dose vs High-Dose  
15 Glucocorticoids Added to Rituximab on Remission Induction in ANCA-Associated Vasculitis: A  
16 Randomized Clinical Trial. *JAMA*. 2021;325(21):2178–2187.
- 17  
18 19. Keller SF, Miloslavsky EM. Corticosteroids in Antineutrophil Cytoplasmic Antibody-Associated  
19 Vasculitis. *Rheum Dis Clin North Am* 2016;42(1):91-101.
- 20  
21 20. Flossmann O , Berden A , de Groot K , et al . Long-term patient survival in ANCA-associated  
22 vasculitis. *Ann Rheum Dis* 2011;70:488–94.
- 23  
24 21. Furuta S , Chaudhry AN , Hamano Y , et al . Comparison of phenotype and outcome in microscopic  
25 polyangiitis between Europe and Japan. *J Rheumatol* 2014;41:325–33.
- 26  
27 22. Walsh M , Merkel PA , Mahr A , et al . Effects of duration of glucocorticoid therapy on relapse rate  
28 in antineutrophil cytoplasmic antibody-associated vasculitis: a meta-analysis. *Arthritis Care Res*  
29 2010;62:1166–73.
- 30  
31 23. Wada T , Hara A , Arimura Y , et al . Risk factors associated with relapse in Japanese patients with  
32 microscopic polyangiitis. *J Rheumatol* 2012;39:545–51.
- 33  
34 24. Walsh M, Merkel PA, Peh CA, et al. Plasma Exchange and Glucocorticoids in Severe ANCA-  
35 Associated Vasculitis. *N Engl J Med* 2020;382(7):622-631.
- 36  
37 25.  
38 Moher D, Liberati A, Tetzlaff J, et al.; PRISMA Group. Preferred reporting items for systematic  
39 reviews and meta-analyses: the PRISMA statement. *J Clin Epidemiol* 2009;62:1006-12.
- 40  
41 26. Salvador F. ANCA associated vasculitis. *Eur J Intern Med* 2020;74:18-28.
- 42  
43 27. Pagnoux C. Updates in ANCA-associated vasculitis. *Eur J Rheumatol* 2016;3(3):122-133.
- 44  
45 28. Guyatt G, Busse JW. Risk of bias in randomized trials. *GROWTH Evidence*; 2016. Available:  
46 <https://growthevidence.com/gordon-h-guyatt-md-msc-and-jason-w-busse-dc-phd> (accessed 2020 April.  
47 6).
- 48  
49 29. Guyatt G, Oxman AD, Akl EA, et al. GRADE guidelines: 1. Introduction-GRADE evidence  
50 profiles and summary of findings tables. *J Clin Epidemiol* 2011; 64: 383-94.
- 51  
52 30. Guyatt GH, Oxman AD, Santesso N, et al. GRADE guidelines: 12. Preparing summary of findings  
53 tables-binary outcomes. *J Clin Epidemiol* 2013;66:158-72.
- 54  
55 31. Guyatt GH, Thorlund K, Oxman AD, et al. GRADE guidelines: 13. Preparing summary of findings  
56 tables and evidence profiles-continuous outcomes. *J Clin Epidemiol* 2013;66:173-83.
- 57  
58 32. Illei GG, Yarboro CH, Kuroiwa T, et al.. Long-term effects of combination treatment with  
59 fludarabine and low-dose pulse cyclophosphamide in patients with lupus nephritis. *Rheumatology*  
(Oxford) 2007;46:952–956.
- 60  
33. Flossmann O, Berden A, de Groot K, et al., European Vasculitis Study Group. Long-term patient  
survival in ANCA-associated vasculitis. *Ann Rheum Dis* 2011;70:488-94.



- 1  
2  
3 34. Jones RB, Tervaert JWC, Hauser T, et al. Rituximab versus cyclophosphamide in ANCA-  
4 associated renal vasculitis. *N Engl J Med* 2010;363(3):211-20.  
5  
6 35. Jayne D, Rasmussen N, Andrassy K, et al.; European Vasculitis Study Group: A randomized trial  
7 of maintenance therapy for vasculitis associated with antineutrophil cytoplasmic autoantibodies. *N*  
8 *Engl J Med* 349 : 36 –44, 2003.  
9  
10 36. Buttgereit F, Burmester GR, Lipworth BJ. Optimised glucocorticoid therapy: the sharpening of an  
11 old spear. *Lancet* 2005;365(9461):801-3.  
12  
13  
14  
15  
16  
17  
18  
19  
20  
21  
22  
23  
24  
25  
26  
27  
28  
29  
30  
31  
32  
33  
34  
35  
36  
37  
38  
39  
40  
41  
42  
43  
44  
45  
46  
47  
48  
49  
50  
51  
52  
53  
54  
55  
56  
57  
58  
59  
60

For peer review only

1  
2  
3  
4  
5  
6  
7  
8  
9  
10  
11  
12  
13  
14  
15  
16  
17  
18  
19  
20  
21  
22  
23  
24  
25  
26  
27  
28  
29  
30  
31  
32  
33  
34  
35  
36  
37  
38  
39  
40  
41

Identification

Screening

Eligibility

Included

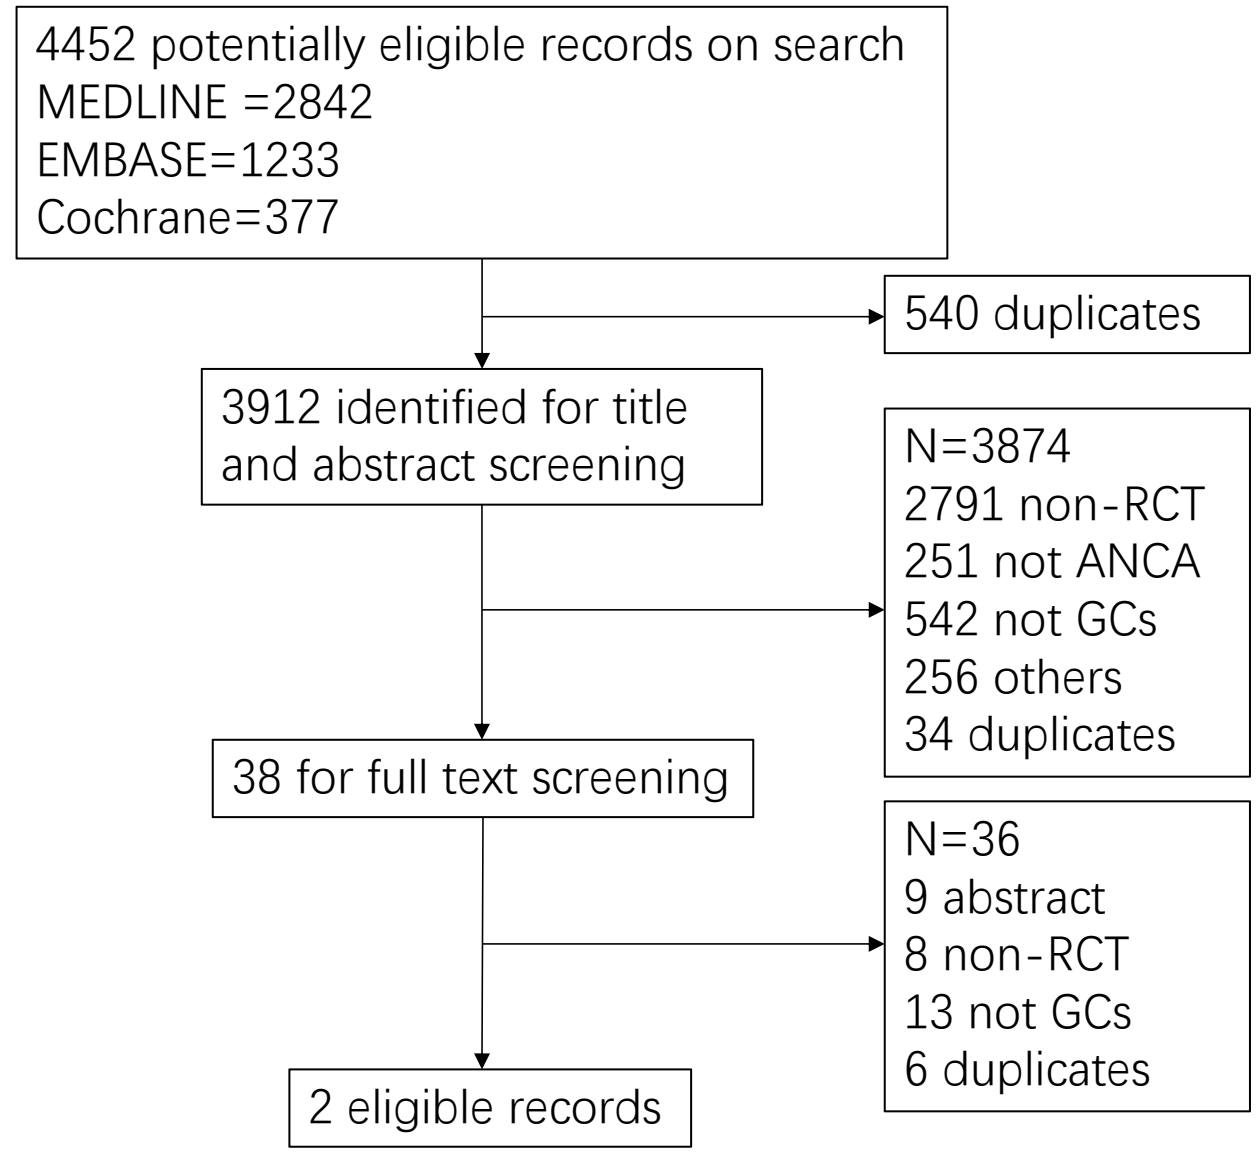

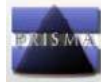

# PRISMA 2009 Checklist

| Section/topic                      | #  | Checklist item                                                                                                                                                                                                                                                                                              | Reported on page # |
|------------------------------------|----|-------------------------------------------------------------------------------------------------------------------------------------------------------------------------------------------------------------------------------------------------------------------------------------------------------------|--------------------|
| <b>TITLE</b>                       |    |                                                                                                                                                                                                                                                                                                             |                    |
| Title                              | 1  | Identify the report as a systematic review, meta-analysis, or both.                                                                                                                                                                                                                                         | 1-2                |
| <b>ABSTRACT</b>                    |    |                                                                                                                                                                                                                                                                                                             |                    |
| Structured summary                 | 2  | Provide a structured summary including, as applicable: background; objectives; data sources; study eligibility criteria, participants, and interventions; study appraisal and synthesis methods; results; limitations; conclusions and implications of key findings; systematic review registration number. | 3-4                |
| <b>INTRODUCTION</b>                |    |                                                                                                                                                                                                                                                                                                             |                    |
| Rationale                          | 3  | Describe the rationale for the review in the context of what is already known.                                                                                                                                                                                                                              | 5-6                |
| Objectives                         | 4  | Provide an explicit statement of questions being addressed with reference to participants, interventions, comparisons, outcomes, and study design (PICOS).                                                                                                                                                  | 6                  |
| <b>METHODS</b>                     |    |                                                                                                                                                                                                                                                                                                             |                    |
| Protocol and registration          | 5  | Indicate if a review protocol exists, if and where it can be accessed (e.g., Web address), and, if available, provide registration information including registration number.                                                                                                                               | 6                  |
| Eligibility criteria               | 6  | Specify study characteristics (e.g., PICOS, length of follow-up) and report characteristics (e.g., years considered, language, publication status) used as criteria for eligibility, giving rationale.                                                                                                      | 7                  |
| Information sources                | 7  | Describe all information sources (e.g., databases with dates of coverage, contact with study authors to identify additional studies) in the search and date last searched.                                                                                                                                  | 7                  |
| Search                             | 8  | Present full electronic search strategy for at least one database, including any limits used, such that it could be repeated.                                                                                                                                                                               | 7                  |
| Study selection                    | 9  | State the process for selecting studies (i.e., screening, eligibility, included in systematic review, and, if applicable, included in the meta-analysis).                                                                                                                                                   | 8                  |
| Data collection process            | 10 | Describe method of data extraction from reports (e.g., piloted forms, independently, in duplicate) and any processes for obtaining and confirming data from investigators.                                                                                                                                  | 7-8                |
| Data items                         | 11 | List and define all variables for which data were sought (e.g., PICOS, funding sources) and any assumptions and simplifications made.                                                                                                                                                                       | 7-8                |
| Risk of bias in individual studies | 12 | Describe methods used for assessing risk of bias of individual studies (including specification of whether this was done at the study or outcome level), and how this information is to be used in any data synthesis.                                                                                      | 8                  |
| Summary measures                   | 13 | State the principal summary measures (e.g., risk ratio, difference in means).                                                                                                                                                                                                                               | 8                  |
| Synthesis of results               | 14 | Describe the methods of handling data and combining results of studies, if done, including measures of consistency (e.g., $I^2$ ) for each meta-analysis.                                                                                                                                                   | 8                  |

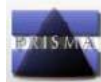

# PRISMA 2009 Checklist

| Section/topic                 | #  | Checklist item                                                                                                                                                                                           | Reported on page # |
|-------------------------------|----|----------------------------------------------------------------------------------------------------------------------------------------------------------------------------------------------------------|--------------------|
| Risk of bias across studies   | 15 | Specify any assessment of risk of bias that may affect the cumulative evidence (e.g., publication bias, selective reporting within studies).                                                             | 8                  |
| Additional analyses           | 16 | Describe methods of additional analyses (e.g., sensitivity or subgroup analyses, meta-regression), if done, indicating which were pre-specified.                                                         | 8                  |
| <b>RESULTS</b>                |    |                                                                                                                                                                                                          |                    |
| Study selection               | 17 | Give numbers of studies screened, assessed for eligibility, and included in the review, with reasons for exclusions at each stage, ideally with a flow diagram.                                          | 9                  |
| Study characteristics         | 18 | For each study, present characteristics for which data were extracted (e.g., study size, PICOS, follow-up period) and provide the citations.                                                             | 9-12               |
| Risk of bias within studies   | 19 | Present data on risk of bias of each study and, if available, any outcome level assessment (see item 12).                                                                                                | 13                 |
| Results of individual studies | 20 | For all outcomes considered (benefits or harms), present, for each study: (a) simple summary data for each intervention group (b) effect estimates and confidence intervals, ideally with a forest plot. | 9-12               |
| Synthesis of results          | 21 | Present results of each meta-analysis done, including confidence intervals and measures of consistency.                                                                                                  | 13-17              |
| Risk of bias across studies   | 22 | Present results of any assessment of risk of bias across studies (see Item 15).                                                                                                                          | 13-17              |
| Additional analysis           | 23 | Give results of additional analyses, if done (e.g., sensitivity or subgroup analyses, meta-regression [see Item 16]).                                                                                    | 13-17              |
| <b>DISCUSSION</b>             |    |                                                                                                                                                                                                          |                    |
| Summary of evidence           | 24 | Summarize the main findings including the strength of evidence for each main outcome; consider their relevance to key groups (e.g., healthcare providers, users, and policy makers).                     | 18-19              |
| Limitations                   | 25 | Discuss limitations at study and outcome level (e.g., risk of bias), and at review-level (e.g., incomplete retrieval of identified research, reporting bias).                                            | 19-20              |
| Conclusions                   | 26 | Provide a general interpretation of the results in the context of other evidence, and implications for future research.                                                                                  | 20                 |
| <b>FUNDING</b>                |    |                                                                                                                                                                                                          |                    |
| Funding                       | 27 | Describe sources of funding for the systematic review and other support (e.g., supply of data); role of funders for the systematic review.                                                               | 21                 |

From: Moher D, Liberati A, Tetzlaff J, Altman DG, The PRISMA Group (2009). Preferred Reporting Items for Systematic Reviews and Meta-Analyses: The PRISMA Statement. PLoS Med 6(7): e1000097. doi:10.1371/journal.pmed1000097

For more information, visit: [www.prisma-statement.org](http://www.prisma-statement.org).

**Appendix 2: Search strategies and results for The comparative efficacy and safety of alternative glucocorticoids regimens in patients with ANCA-associated vasculitis: A systematic review**

| Database         | No of records |
|------------------|---------------|
| MEDLINE          | 2842          |
| EMBASE           | 1233          |
| Cochrane Library | 377           |
| Subtotal         | 4452          |
| -duplicates      | -540          |
| Total            | 3912          |

Database: OVID MEDLINE

- 
- 1 Anti-Neutrophil Cytoplasmic Antibody-Associated Vasculitis/ (1682)
  - 2 Churg-Strauss Syndrome/ (2090)
  - 3 Microscopic Polyangiitis/ (507)
  - 4 Granulomatosis with Polyangiitis/ (6902)
  - 5 (vasculit\* adj3 (ANCA or AAV or antineutrophil or anti-neutrophil or cytoplasm\* or RLV or renal or churg or strauss or pauci immune)).mp. [mp=title, abstract, original title, name of substance word, subject heading word, floating sub-heading word, keyword heading word, organism supplementary concept word, protocol supplementary concept word, rare disease supplementary concept word, unique identifier, synonyms] (4968)
  - 6 churg strauss.mp. (2876)
  - 7 ((angiit\* or vasculit\*) adj3 (granulom\* or necrot\* or allergic)).mp. [mp=title, abstract, original title, name of substance word, subject heading word, floating sub-heading word, keyword heading word, organism supplementary concept word, protocol supplementary concept word, rare disease supplementary concept word, unique identifier, synonyms] (4297)
  - 8 ((polyangiit\* or polyarterit\*) adj3 (microscop\* or MPA or granulom\*)).mp. (9268)
  - 9 wegener\*.mp. (6572)
  - 10 (glomerulonephrit\* adj3 necrot\*).mp. [mp=title, abstract, original title, name of substance word, subject heading word, floating sub-heading word, keyword heading word, organism supplementary concept word, protocol supplementary concept word, rare disease supplementary concept word, unique identifier, synonyms] (797)
  - 11 or/1-10 (18126)
  - 12 exp Glucocorticoids/ (190619)
  - 13 prednisolone/ or methylprednisolone/ (49855)
  - 14 Prednisone/ (39084)
  - 15 Adrenal Cortex Hormones/ (63823)

- 1  
2  
3 16 (corticosteroid\* or glucocorticoid\* or methylprednisolon\* or prednison\* or  
4 prednisolon\*).mp. [mp=title, abstract, original title, name of substance word, subject  
5 heading word, floating sub-heading word, keyword heading word, organism  
6 supplementary concept word, protocol supplementary concept word, rare disease  
7 supplementary concept word, unique identifier, synonyms] (283874)  
8  
9 17 Corticosterone/ or corticosteron\*.mp. (34191)  
10 18 Hydrocortisone/ or hydrocortison\*.mp. (76765)  
11 19 Cortisone/ or cortison\*.mp. (23710)  
12 20 steroids.mp. or Steroids/ (112972)  
13 21 Cortodoxone/ or cortodoxon\*.mp. (856)  
14 22 Hydroxycorticosteroids/ or hydroxycorticosteroid\*.mp. (6731)  
15 23 Dexamethasone/ or dexamethason\*.mp. (71052)  
16 24 adrenocorticosteroid\*.mp. (313)  
17 25 adrenocorticoid\*.mp. (177)  
18 26 corticoid\*.mp. (6458)  
19 27 or/12-26 (547377)  
20 28 11 and 27 (4782)  
21 29 randomized controlled trial.pt. (503644)  
22 30 controlled clinical trial.pt. (93611)  
23 31 randomized.ab. (475606)  
24 32 placebo.ab. (206694)  
25 33 drug therapy.fs. (2193818)  
26 34 randomly.ab. (330775)  
27 35 trial.ab. (501000)  
28 36 groups.ab. (2031658)  
29 37 or/29-36 (4675601)  
30 38 exp animals/ not humans.sh. (4689197)  
31 39 37 not 38 (4053127)  
32 40 28 and 39 (2842)  
33  
34  
35  
36  
37  
38  
39  
40

Database: EMBASE

- 41  
42 1 ANCA associated vasculitis/ (5871)  
43 2 Churg Strauss syndrome/ (4947)  
44 3 microscopic polyangiitis/ (3039)  
45 4 Wegener granulomatosis/ (12860)  
46 5 (vasculit\* adj3 (ANCA or AAV or antineutrophil or anti-neutrophil or cytoplasm\*  
47 or RLV or renal or churg or strauss or pauci immune)).mp. [mp=title, abstract,  
48 heading word, drug trade name, original title, device manufacturer, drug  
49 manufacturer, device trade name, keyword, floating subheading word, candidate  
50 term word] (9651)  
51 6 churg strauss.mp. (5425)  
52 7 ((angiit\* or vasculit\*) adj3 (granulom\* or necrot\* or allergic)).mp. [mp=title,  
53 abstract, heading word, drug trade name, original title, device manufacturer, drug  
54  
55  
56  
57  
58  
59  
60

1  
 2  
 3 manufacturer, device trade name, keyword, floating subheading word, candidate  
 4 term word] (7160)  
 5 8 ((polyangiit\* or polyarterit\*) adj3 (microscop\* or MPA or granulom\*)).mp.  
 6 [mp=title, abstract, heading word, drug trade name, original title, device  
 7 manufacturer, drug manufacturer, device trade name, keyword, floating subheading  
 8 word, candidate term word] (7171)  
 9 9 wegener\*.mp. (14257)  
 10 10 (glomerulonephrit\* adj3 necrot\*).mp. [mp=title, abstract, heading word, drug  
 11 trade name, original title, device manufacturer, drug manufacturer, device trade  
 12 name, keyword, floating subheading word, candidate term word] (1243)  
 13 11 or/1-10 (29983)  
 14 12 exp glucocorticoid/ (700322)  
 15 13 prednisolone/ (122582)  
 16 14 methylprednisolone/ (93152)  
 17 15 prednisone/ (167298)  
 18 16 corticosteroid/ (229322)  
 19 17 (corticosteroid\* or glucocorticoid\* or methylprednisolon\* or prednison\* or  
 20 prednisolon\*).mp. [mp=title, abstract, heading word, drug trade name, original title,  
 21 device manufacturer, drug manufacturer, device trade name, keyword, floating  
 22 subheading word, candidate term word] (688798)  
 23 18 corticosterone/ or corticosteron\*.mp. (38497)  
 24 19 hydrocortisone/ or hydrocortison\*.mp. (135041)  
 25 20 cortisone/ or cortison\*.mp. (17205)  
 26 21 steroids.mp. or steroid/ (245681)  
 27 22 cortodoxone/ or cortodoxon\*.mp. (2044)  
 28 23 hydroxycorticosteroid\*.mp. or hydroxycorticosteroid/ (2310)  
 29 24 dexamethasone/ or dexamethason\*.mp. (161446)  
 30 25 adrenocorticosteroid\*.mp. (286)  
 31 26 adrenocorticoid\*.mp. (169)  
 32 27 corticoid\*.mp. (7745)  
 33 28 or/12-27 (1111323)  
 34 29 11 and 28 (13676)  
 35 30 randomized controlled trial/ (598366)  
 36 31 Controlled clinical study/ (463908)  
 37 32 random\$.ti,ab. (1520687)  
 38 33 randomization/ (86548)  
 39 34 intermethod comparison/ (258594)  
 40 35 placebo.ti,ab. (303776)  
 41 36 (compare or compared or comparison).ti. (505122)  
 42 37 ((evaluated or evaluate or evaluating or assessed or assess) and (compare or  
 43 compared or comparing or comparison)).ab. (2085158)  
 44 38 (open adj label).ti,ab. (78322)  
 45 39 ((double or single or doubly or singly) adj (blind or blinded or blindly)).ti,ab.  
 46 (230181)  
 47 40 double blind procedure/ (171296)  
 48 41 parallel group\$.ti,ab. (25234)

1  
2  
3 42 (crossover or cross over).ti,ab. (104111)  
4 43 ((assign\$ or match or matched or allocation) adj5 (alternate or group\$1 or  
5 intervention\$1 or patient\$1 or subject\$1 or participant\$1)).ti,ab. (326088)  
6 44 (assigned or allocated).ti,ab. (383843)  
7 45 (controlled adj7 (study or design or trial)).ti,ab. (343989)  
8 46 (volunteer or volunteers).ti,ab. (244774)  
9 47 human experiment/ (490852)  
10 48 trial.ti. (296188)  
11 49 or/30-48 (4957675)  
12 50 29 and 49 (1233)  
13  
14  
15  
16  
17  
18

Database: Cochrane Library

-----

19  
20 ID Search Hits  
21 #1 MeSH descriptor: [Anti-Neutrophil Cytoplasmic Antibody-Associated  
22 Vasculitis] explode all trees 157  
23 #2 MeSH descriptor: [Churg-Strauss Syndrome] explode all trees 27  
24 #3 MeSH descriptor: [Microscopic Polyangiitis] explode all trees 40  
25 #4 MeSH descriptor: [Granulomatosis with Polyangiitis] explode all trees 82  
26 #5 vasculit\* near/3 (ANCA or AAV or antineutrophil or anti-neutrophil or  
27 cytoplasm\* or RLV or renal or churg or strauss or pauci immune) 470  
28 #6 churg strauss 112  
29 #7 ((angiit\* or vasculit\*) near/3 (granulom\* or necrot\* or allergic)) 102  
30 #8 ((polyangiit\* or polyarterit\*) near/3 (microscop\* or MPA or granulom\*))  
31 277  
32 #9 wegener\* 394  
33 #10 (glomerulonephrit\* near/3 necrot\*) 13  
34 #11 #1 or #2 or #3 or #4 or #5 or #6 or #7 or #8 or #9 or #10 867  
35 #12 MeSH descriptor: [Glucocorticoids] explode all trees 4445  
36 #13 MeSH descriptor: [Prednisolone] explode all trees 4804  
37 #14 MeSH descriptor: [Methylprednisolone] explode all trees 2679  
38 #15 MeSH descriptor: [Prednisone] explode all trees 3909  
39 #16 MeSH descriptor: [Adrenal Cortex Hormones] explode all trees 14135  
40 #17 corticosteroid\* or glucocorticoid\* or methylprednisolon\* or prednison\* or  
41 prednisolon\* 41757  
42 #18 MeSH descriptor: [Corticosterone] explode all trees 38  
43 #19 MeSH descriptor: [Hydrocortisone] explode all trees 5886  
44 #20 MeSH descriptor: [Cortisone] explode all trees 143  
45 #21 MeSH descriptor: [Steroids] explode all trees 57500  
46 #22 MeSH descriptor: [Cortodoxone] explode all trees 30  
47 #23 MeSH descriptor: [Cortodoxone] explode all trees 30  
48 #24 MeSH descriptor: [Hydroxycorticosteroids] explode all trees 7002  
49 #25 MeSH descriptor: [Dexamethasone] explode all trees 4409  
50  
51  
52  
53  
54  
55  
56  
57  
58  
59  
60



1  
2  
3 #26 corticosteron\* or hydrocortison or cortison\* or steroids or cortodoxon\* or  
4 hydroxycorticosteroid\* or dexamethason\* or adrenocorticosteroid\* or  
5 adrenocorticoid\* or corticoid\* 22688  
6  
7 #27 #12 or #13 or #14 or #15 or #16 or #17 or #18 or #19 or #20 or #21 or #22  
8 or #23 or #24 or #25 or #26 95898  
9 #28 #11 and #27 in Trials 377  
10  
11  
12  
13  
14  
15  
16  
17  
18  
19  
20  
21  
22  
23  
24  
25  
26  
27  
28  
29  
30  
31  
32  
33  
34  
35  
36  
37  
38  
39  
40  
41  
42  
43  
44  
45  
46  
47  
48  
49  
50  
51  
52  
53  
54  
55  
56  
57  
58  
59  
60

For peer review only

**Appendix 3 Risk of Bias assessment for outcomes of included RCTs**

| Outcomes of Trials             | Sequence generation | Allocation concealment | Blinding (patients) | Blinding (health care providers) | Blinding (outcome assessors) | Blinding (data collectors) | Blinding (data analyst) | Loss to follow-up |
|--------------------------------|---------------------|------------------------|---------------------|----------------------------------|------------------------------|----------------------------|-------------------------|-------------------|
| <b>Walsh et al. 2020</b>       |                     |                        |                     |                                  |                              |                            |                         |                   |
| Death                          | Definitely          | Definitely             | Probably            | Probably                         | Probably                     | Probably                   | Probably                | Definitely        |
|                                | Low                 | Low                    | Low                 | Low                              | Low                          | Low                        | Low                     | Low               |
| ESKD                           | Definitely          | Definitely             | Probably            | Probably                         | Probably                     | Probably                   | Probably                | Definitely        |
|                                | Low                 | Low                    | Low                 | Low                              | Low                          | Low                        | Low                     | Low               |
| Remission                      | Definitely          | Definitely             | Probably            | Probably                         | Probably                     | Probably                   | Probably                | Definitely        |
|                                | Low                 | Low                    | Low                 | Low                              | Low                          | Low                        | Low                     | Low               |
| Serious adverse events         | Definitely          | Definitely             | Probably            | Probably                         | Probably                     | Probably                   | Probably                | Definitely        |
|                                | Low                 | Low                    | Low                 | Low                              | Low                          | Low                        | Low                     | Low               |
| Serious infections             | Definitely          | Definitely             | Probably            | Probably                         | Probably                     | Probably                   | Probably                | Definitely        |
|                                | Low                 | Low                    | Low                 | Low                              | Low                          | Low                        | Low                     | Low               |
| Health-related quality of life | Definitely          | Definitely             | Probably            | Probably                         | Probably                     | Probably                   | Probably                | Definitely        |
|                                | Low                 | Low                    | Low                 | Low                              | Low                          | Low                        | Low                     | Low               |
| <b>Furuta et al. 2021</b>      |                     |                        |                     |                                  |                              |                            |                         |                   |
| Death                          | Definitely          | Definitely             | Probably            | Probably                         | Probably                     | Probably                   | Probably                | Definitely        |
|                                | Low                 | Low                    | Low                 | Low                              | Low                          | Low                        | Low                     | Low               |
| ESKD                           | Definitely          | Definitely             | Probably            | Probably                         | Probably                     | Probably                   | Probably                | Definitely        |
|                                | Low                 | Low                    | Low                 | Low                              | Low                          | Low                        | Low                     | Low               |
| Remission                      | Definitely          | Definitely             | Probably            | Probably                         | Probably                     | Probably                   | Probably                | Definitely        |
|                                | Low                 | Low                    | Low                 | Low                              | Low                          | Low                        | Low                     | Low               |
| Relapse                        | Definitely          | Definitely             | Probably            | Probably                         | Probably                     | Probably                   | Probably                | Definitely        |
|                                | Low                 | Low                    | Low                 | Low                              | Low                          | Low                        | Low                     | Low               |
| Serious adverse events         | Definitely          | Definitely             | Probably            | Probably                         | Probably                     | Probably                   | Probably                | Definitely        |
|                                | Low                 | Low                    | Low                 | Low                              | Low                          | Low                        | Low                     | Low               |
| Serious infections             | Definitely          | Definitely             | Probably            | Probably                         | Probably                     | Probably                   | Probably                | Definitely        |
|                                | Low                 | Low                    | Low                 | Low                              | Low                          | Low                        | Low                     | Low               |
| Health-related quality of life | Definitely          | Definitely             | Probably            | Probably                         | Probably                     | Probably                   | Probably                | Definitely        |
|                                | Low                 | Low                    | Low                 | Low                              | Low                          | Low                        | Low                     | Low               |

ESKD: end-stage kidney disease; RCT: randomized controlled trial.

**Appendix 4 GRADE summary of findings on the use of reduced-dose regimen versus standard-dose regimen of glucocorticoids in patients with ANCA-associated vasculitis**

| Outcome<br>Timeframe     | Study results and measurements                                                 | Absolute effect estimates<br>Standard-dose regimen of glucocorticoids    Reduced-dose regimen of glucocorticoids                                                                                                                                                                                                                                                                                                                                                                                                                         | Certainty of the Evidence<br>(Quality of evidence)         | Plain text summary                                                                                                                 |
|--------------------------|--------------------------------------------------------------------------------|------------------------------------------------------------------------------------------------------------------------------------------------------------------------------------------------------------------------------------------------------------------------------------------------------------------------------------------------------------------------------------------------------------------------------------------------------------------------------------------------------------------------------------------|------------------------------------------------------------|------------------------------------------------------------------------------------------------------------------------------------|
| Death                    | Based on data from 838 patients in 2 study<br>Follow up: 6 months to 2.9 years | Two RCTs reported death from any cause. In Walsh et al's trial, death occurred in 46 of 353 patients (13.0%) in the reduced-dose GC therapy group and in 53 of 351 patients (15.1%) in the standard-dose GC therapy group (Risk difference, -2.1%; 95% confidence interval, -6% to 3.6%). In Furuta et al's trial, death occurred in 2 of 69 patients (2.9%) in the reduced-dose GC treatment group and in 3 of 65 patients (4.6%) in the high-dose GC treatment group (Risk difference, -1.7%; 95% confidence interval, -4.7% to 8.2%). | <b>Low</b><br>Due to very serious imprecision <sup>1</sup> | Reduced dose of glucocorticoids may reduce death at follow-up of 6 months to 2.9 years                                             |
| End-stage kidney disease | Based on data from 838 patients in 2 study<br>Follow up: 6 months to 2.9 years | Two RCTs reported end-stage kidney disease. In Walsh et al's trial, end-stage kidney disease occurred in 70 of 353 patients (19.8%) in the reduced-dose GC therapy group and in 68 of 351 patients (19.4%) in the standard-dose GC therapy group (Risk difference, 0.4%; 95% confidence interval, -4.7%                                                                                                                                                                                                                                  | <b>Moderate</b><br>Due to serious imprecision <sup>2</sup> | Reduced dose of glucocorticoids probably has little or no effect on end-stage kidney disease at follow-up of 6 months to 2.9 years |

|                  |                                                                                        |                                                                                                                                                                                                                                                                                                                                                                                                                                                                                            |                                                                   |                                                                                                                                      |
|------------------|----------------------------------------------------------------------------------------|--------------------------------------------------------------------------------------------------------------------------------------------------------------------------------------------------------------------------------------------------------------------------------------------------------------------------------------------------------------------------------------------------------------------------------------------------------------------------------------------|-------------------------------------------------------------------|--------------------------------------------------------------------------------------------------------------------------------------|
|                  |                                                                                        | <p>to 7.4%). In Furuta et al's trial, end-stage kidney disease occurred in none of 69 patients (0%) in the reduced-dose GC treatment group and in 1 of 65 patients (1.5%) in the high-dose GC treatment group (Risk difference, -1.5; 95% confidence interval, -4.5 to 1.5).</p>                                                                                                                                                                                                           |                                                                   |                                                                                                                                      |
| <p>Remission</p> | <p>Based on data from 838 patients in 2 study<br/>Follow up: 6 months to 2.9 years</p> | <p>Two RCTs reported remission rate. In Walsh et al's trial, remission was analyzed in the two GC groups with the use of Cox proportional-hazards models resulting a hazard ratio of 1.04 (95% confidence interval, 0.81 to 1.33). In Furuta et al's trial, remission occurred in 49 of 69 patients (71.0%) in the reduced-dose GC treatment group and in 45 of 65 patients (69.2%) in the high-dose GC treatment group (Risk difference, 1.8%; 97.5% confidence interval, -13% to ∞).</p> | <p><b>Moderate</b><br/>Due to serious imprecision<sup>1</sup></p> | <p>Reduced dose of glucocorticoids probably has little or no effect on disease remission at follow-up of 6 months to 2.9 years</p>   |
| <p>Relapse</p>   | <p>Based on data from 838 patients in 2 study<br/>Follow up: 6 months to 2.9 years</p> | <p>Two RCTs reported remission rate. In Walsh et al's trial, relapse occurred in 32 of 353 patients (9.1%) in the reduced-dose GC therapy group and in 23 of 351 patients (6.6%) in the standard-dose GC therapy group (Risk difference, 2.5%; 95% confidence interval, -1.45% to 6.47%). In Furuta et al's trial, relapse occurred in 3</p>                                                                                                                                               | <p><b>Moderate</b><br/>Due to serious imprecision<sup>3</sup></p> | <p>Reduced dose of glucocorticoids probably has little or no effect on relapse in patients at follow-up of 6 months to 2.9 years</p> |

|                        |                                                                             |                                                                                                                                                                                                                                                                                                                                                                                                                                                                                                                                                                                         |                                                                                                 |                                                                                                                                       |
|------------------------|-----------------------------------------------------------------------------|-----------------------------------------------------------------------------------------------------------------------------------------------------------------------------------------------------------------------------------------------------------------------------------------------------------------------------------------------------------------------------------------------------------------------------------------------------------------------------------------------------------------------------------------------------------------------------------------|-------------------------------------------------------------------------------------------------|---------------------------------------------------------------------------------------------------------------------------------------|
|                        |                                                                             | of 69 patients (4.3%) in the reduced-dose GC treatment group and in none of 65 patients (0%) in the high-dose GC treatment group (Risk difference, 4.4%; 95% confidence interval, -0.5% to 9.2%).                                                                                                                                                                                                                                                                                                                                                                                       |                                                                                                 |                                                                                                                                       |
| Serious adverse events | Based on data from 838 patients in 2 study<br>Follow up: 6 months to 1 year | Two RCTs reported serious adverse events. In Walsh et al's trial, serious adverse events occurred in 230 of 353 patients (65.2%) in the reduced-dose GC therapy group and in 218 of 351 patients (62.1%) in the standard-dose GC therapy group (Risk difference, 3.1%; 95% confidence interval, -3.7% to 11.2%). In Furuta et al's trial, serious adverse events occurred in 13 of 69 patients (18.8%) in the reduced-dose GC treatment group and in 24 of 65 patients (36.9%) in the high-dose GC treatment group (Risk difference, -18.1%; 95% confidence interval, -33.0% to -3.2%). | <b>Very Low</b><br>Due to serious imprecision <sup>4</sup><br>Due to very serious inconsistency | We are uncertain whether reduced dose of glucocorticoids increases or reduce the risk of serious adverse events at 6 months to 1 year |
| Serious infections     | Based on data from 838 patients in 2 study<br>Follow up: 6 months to 1 year | Two RCTs reported serious infections. In Walsh et al's trial, serious infections occurred in 230 of 353 patients (27.1%) in the reduced-dose GC therapy group and in 218 of 351 patients (33.0%) in the standard-dose GC therapy group (Risk difference, -5.9%;                                                                                                                                                                                                                                                                                                                         | <b>Moderate</b><br>Due to serious imprecision <sup>3</sup>                                      | Reduced dose of glucocorticoids probably reduces the risk of serious infections at 6 months to 1 year                                 |

|                                                   |                                                                                                                                                                                                         |                                                                                                                                                                                                                                                                                                                                                                                                                                                                                                                                                                                                                                                                                                               |                                                                            |                                                                                                                                             |
|---------------------------------------------------|---------------------------------------------------------------------------------------------------------------------------------------------------------------------------------------------------------|---------------------------------------------------------------------------------------------------------------------------------------------------------------------------------------------------------------------------------------------------------------------------------------------------------------------------------------------------------------------------------------------------------------------------------------------------------------------------------------------------------------------------------------------------------------------------------------------------------------------------------------------------------------------------------------------------------------|----------------------------------------------------------------------------|---------------------------------------------------------------------------------------------------------------------------------------------|
|                                                   |                                                                                                                                                                                                         | <p>95% confidence interval, -11.2% to 1.0%). In Furuta et al's trial, serious infections occurred in 5 of 69 patients (7.2%) in the reduced-dose GC treatment group and in 13 of 65 patients (20.0%) in the high-dose GC treatment group (Risk difference, -12.8%; 95% confidence interval, -24.2% to -1.3%).</p>                                                                                                                                                                                                                                                                                                                                                                                             |                                                                            |                                                                                                                                             |
| <p>Health related quality of life (SF-36 PCS)</p> | <p>Measured by: SF-36 PCS<br/>                     Scale: - High better<br/>                     Based on data from 838 patients in 2 study<br/>                     Follow up: 6 months to 1 years</p> | <p>Two RCTs reported health related quality of life assessed by SF-36 PCS. Walsh et al's trial reported that the mean score of health related quality of life measured by SF-36PCS was 39.13 in the reduced-dose GC therapy group and 37.84 in the standard-dose GC therapy group (Mean difference, 1.29 higher; 95% confidence interval, 0.26 lower to 2.84 higher). Furuta et al's trial reported that the median score of health related quality of life measured by SF-36PCS was 38.3 (IQR : 21.1 to 47.4) in the reduced-dose GC treatment group and 31.7 (IQR : 22.0 to 49.4) in the high-dose GC treatment group (Mean difference, 6.3 higher; 95% confidence interval, 2.6 lower to 15.2 higher).</p> | <p><b>Moderate</b><br/>                     Due to serious imprecision</p> | <p>Reduced dose of glucocorticoids probably has little or no effect on health related quality of life (SF-36PCS) at 6 months to 1 years</p> |

|                                                                     |                                                                                                                                                   |                                                                                                                                                                                                                                                                                                                                                                                                                                                                                                                                                                                                                                                                                                                    |                                                                      |                                                                                                                                    |
|---------------------------------------------------------------------|---------------------------------------------------------------------------------------------------------------------------------------------------|--------------------------------------------------------------------------------------------------------------------------------------------------------------------------------------------------------------------------------------------------------------------------------------------------------------------------------------------------------------------------------------------------------------------------------------------------------------------------------------------------------------------------------------------------------------------------------------------------------------------------------------------------------------------------------------------------------------------|----------------------------------------------------------------------|------------------------------------------------------------------------------------------------------------------------------------|
| <p>Health related quality of life (SF-36 MCS)</p>                   | <p>Measured by: SF-36 MCS</p> <p>Scale: - High better</p> <p>Based on data from 838 patients in 2 study</p> <p>Follow up: 6 months to 1 years</p> | <p>Two RCTs reported health related quality of life assessed by SF-36 MCS. Walsh et al's trial reported that the mean score of health related quality of life measured by SF-36MCS was 52.16 in the reduced-dose GC therapy group and 51.19 in the standard-dose GC therapy group (Mean difference, 0.97 higher; 95% confidence interval, 0.24 lower to 2.18 higher).</p> <p>Furuta et al's trial reported that the median score of health related quality of life measured by SF-36MCS was 49.8 (IQR : 45.1 to 56.6) in the reduced-dose GC treatment group and 50.4 (IQR : 46.3 to 57.2) in the high-dose GC treatment group (Mean difference, 0.4 lower; 95% confidence interval, 4.7 lower to 4.0 higher).</p> | <p><b>High</b></p>                                                   | <p>Reduced dose of glucocorticoids has little or no effect on health related quality of life (SF-36MCS) at 6 months to 1 years</p> |
| <p>Health related quality of life (EQ-5D Index) at 1 year</p>       | <p>Measured by: EQ-5D Index</p> <p>Scale: - High better</p> <p>Based on data from 704 patients in 1 study</p> <p>Follow up at 1 year</p>          | <p><b>0.77</b>      <b>0.79</b></p> <p>Mean            Mean</p> <p>Difference: <b>MD 0.02 higher</b><br/>(CI 95% 0.01 lower - 0.05 higher)</p>                                                                                                                                                                                                                                                                                                                                                                                                                                                                                                                                                                     | <p><b>Moderate</b></p> <p>Due to serious imprecision<sup>5</sup></p> | <p>Reduced dose of glucocorticoids probably has little or no effect on health related quality of life (EQ-5D) at 1 year</p>        |
| <p>Health related quality of life (EQ-5D Thermometer) at 1 year</p> | <p>Measured by: EQ-5D Thermometer</p> <p>Scale: - High better</p> <p>Based on data from 704 patients in 1 study</p> <p>Follow up at 1 year</p>    | <p><b>71.07</b>      <b>72.11</b></p> <p>Mean            Mean</p> <p>Difference: <b>MD 1.04 higher</b><br/>(CI 95% 1.09 lower - 3.17 higher)</p>                                                                                                                                                                                                                                                                                                                                                                                                                                                                                                                                                                   | <p><b>High</b></p>                                                   | <p>Reduced dose of glucocorticoids has little or no effect on health related quality of life (EQ-5D Thermometer) at 1 year</p>     |

1  
2  
3  
4  
5  
6  
7  
8  
9  
10  
11  
12  
13  
14  
15  
16  
17  
18  
19  
20  
21  
22  
23  
24  
25  
26  
27  
28  
29  
30  
31  
32  
33  
34  
35  
36  
37  
38  
39  
40  
41  
42  
43  
44  
45  
46  
47  
48  
49  
50  
51  
52  
53  
54  
55  
56  
57  
58  
59  
60

1. **Imprecision: Very serious.** Because the 95% CI includes both the minimally important difference for benefit (20 fewer death in 1000 patients) and minimally important difference for harm (20 more death in 1000 patients), we rated down two levels for imprecision;

2. **Imprecision: Serious.** The 95% CI crosses the minimally important difference for benefit (30 fewer ESKD in 1000 patients) and minimally important difference for harm (30 more ESKD in 1000 patients) ;

3. **Imprecision: Serious.** The 95% CI crosses the minimally important difference (50 fewer serious infections in 1000 patients);

4. **Imprecision: Serious.** The 95% CI includes an increase in serious adverse event over 10%;

5. **Imprecision: Serious.** The 95% CI crosses the minimally important difference for benefit and the minimally important difference for harm (0.03 reduction or increase in EQ-5D Index) ;

ESKD: end-stage kidney disease; SF-36 = short form 36; PCS = physical component score; MCS = mental component score; EQ = EuroQol; RR: relative risk; MD: mean difference; CI: confidence interval. IQR = interquartile range





# PRISMA 2009 Checklist

| Section/topic                      | #  | Checklist item                                                                                                                                                                                                                                                                                              | Reported on page # |
|------------------------------------|----|-------------------------------------------------------------------------------------------------------------------------------------------------------------------------------------------------------------------------------------------------------------------------------------------------------------|--------------------|
| <b>TITLE</b>                       |    |                                                                                                                                                                                                                                                                                                             |                    |
| Title                              | 1  | Identify the report as a systematic review, meta-analysis, or both.                                                                                                                                                                                                                                         | 1-2                |
| <b>ABSTRACT</b>                    |    |                                                                                                                                                                                                                                                                                                             |                    |
| Structured summary                 | 2  | Provide a structured summary including, as applicable: background; objectives; data sources; study eligibility criteria, participants, and interventions; study appraisal and synthesis methods; results; limitations; conclusions and implications of key findings; systematic review registration number. | 3-4                |
| <b>INTRODUCTION</b>                |    |                                                                                                                                                                                                                                                                                                             |                    |
| Rationale                          | 3  | Describe the rationale for the review in the context of what is already known.                                                                                                                                                                                                                              | 5-6                |
| Objectives                         | 4  | Provide an explicit statement of questions being addressed with reference to participants, interventions, comparisons, outcomes, and study design (PICOS).                                                                                                                                                  | 6                  |
| <b>METHODS</b>                     |    |                                                                                                                                                                                                                                                                                                             |                    |
| Protocol and registration          | 5  | Indicate if a review protocol exists, if and where it can be accessed (e.g., Web address), and, if available, provide registration information including registration number.                                                                                                                               | 6                  |
| Eligibility criteria               | 6  | Specify study characteristics (e.g., PICOS, length of follow-up) and report characteristics (e.g., years considered, language, publication status) used as criteria for eligibility, giving rationale.                                                                                                      | 7                  |
| Information sources                | 7  | Describe all information sources (e.g., databases with dates of coverage, contact with study authors to identify additional studies) in the search and date last searched.                                                                                                                                  | 7                  |
| Search                             | 8  | Present full electronic search strategy for at least one database, including any limits used, such that it could be repeated.                                                                                                                                                                               | 7                  |
| Study selection                    | 9  | State the process for selecting studies (i.e., screening, eligibility, included in systematic review, and, if applicable, included in the meta-analysis).                                                                                                                                                   | 8                  |
| Data collection process            | 10 | Describe method of data extraction from reports (e.g., piloted forms, independently, in duplicate) and any processes for obtaining and confirming data from investigators.                                                                                                                                  | 7-8                |
| Data items                         | 11 | List and define all variables for which data were sought (e.g., PICOS, funding sources) and any assumptions and simplifications made.                                                                                                                                                                       | 7-8                |
| Risk of bias in individual studies | 12 | Describe methods used for assessing risk of bias of individual studies (including specification of whether this was done at the study or outcome level), and how this information is to be used in any data synthesis.                                                                                      | 8                  |
| Summary measures                   | 13 | State the principal summary measures (e.g., risk ratio, difference in means).                                                                                                                                                                                                                               | 8                  |
| Synthesis of results               | 14 | Describe the methods of handling data and combining results of studies, if done, including measures of consistency (e.g., $I^2$ ) for each meta-analysis.                                                                                                                                                   | 8                  |

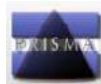

# PRISMA 2009 Checklist

| Section/topic                 | #  | Checklist item                                                                                                                                                                                           | Reported on page # |
|-------------------------------|----|----------------------------------------------------------------------------------------------------------------------------------------------------------------------------------------------------------|--------------------|
| Risk of bias across studies   | 15 | Specify any assessment of risk of bias that may affect the cumulative evidence (e.g., publication bias, selective reporting within studies).                                                             | 8                  |
| Additional analyses           | 16 | Describe methods of additional analyses (e.g., sensitivity or subgroup analyses, meta-regression), if done, indicating which were pre-specified.                                                         | 8                  |
| <b>RESULTS</b>                |    |                                                                                                                                                                                                          |                    |
| Study selection               | 17 | Give numbers of studies screened, assessed for eligibility, and included in the review, with reasons for exclusions at each stage, ideally with a flow diagram.                                          | 9                  |
| Study characteristics         | 18 | For each study, present characteristics for which data were extracted (e.g., study size, PICOS, follow-up period) and provide the citations.                                                             | 9-12               |
| Risk of bias within studies   | 19 | Present data on risk of bias of each study and, if available, any outcome level assessment (see item 12).                                                                                                | 13                 |
| Results of individual studies | 20 | For all outcomes considered (benefits or harms), present, for each study: (a) simple summary data for each intervention group (b) effect estimates and confidence intervals, ideally with a forest plot. | 9-12               |
| Synthesis of results          | 21 | Present results of each meta-analysis done, including confidence intervals and measures of consistency.                                                                                                  | 13-17              |
| Risk of bias across studies   | 22 | Present results of any assessment of risk of bias across studies (see Item 15).                                                                                                                          | 13-17              |
| Additional analysis           | 23 | Give results of additional analyses, if done (e.g., sensitivity or subgroup analyses, meta-regression [see Item 16]).                                                                                    | 13-17              |
| <b>DISCUSSION</b>             |    |                                                                                                                                                                                                          |                    |
| Summary of evidence           | 24 | Summarize the main findings including the strength of evidence for each main outcome; consider their relevance to key groups (e.g., healthcare providers, users, and policy makers).                     | 18-19              |
| Limitations                   | 25 | Discuss limitations at study and outcome level (e.g., risk of bias), and at review-level (e.g., incomplete retrieval of identified research, reporting bias).                                            | 19-20              |
| Conclusions                   | 26 | Provide a general interpretation of the results in the context of other evidence, and implications for future research.                                                                                  | 20                 |
| <b>FUNDING</b>                |    |                                                                                                                                                                                                          |                    |
| Funding                       | 27 | Describe sources of funding for the systematic review and other support (e.g., supply of data); role of funders for the systematic review.                                                               | 21                 |

From: Moher D, Liberati A, Tetzlaff J, Altman DG, The PRISMA Group (2009). Preferred Reporting Items for Systematic Reviews and Meta-Analyses: The PRISMA Statement. PLoS Med 6(7): e1000097. doi:10.1371/journal.pmed1000097

For more information, visit: [www.prisma-statement.org](http://www.prisma-statement.org).

# BMJ Open

## The comparative efficacy and safety of alternative glucocorticoids regimens in patients with ANCA-associated vasculitis: A systematic review

|                                 |                                                                                                                                                                                                                                                                                                                                                                                                                                                                                                                                                                                                                                                                                                                                                                                                                                                                                                                                                                                                                                                                                                                                                                                                                                                                                                                                                                                                                                                                                                                                                                                                                                                                                                                    |
|---------------------------------|--------------------------------------------------------------------------------------------------------------------------------------------------------------------------------------------------------------------------------------------------------------------------------------------------------------------------------------------------------------------------------------------------------------------------------------------------------------------------------------------------------------------------------------------------------------------------------------------------------------------------------------------------------------------------------------------------------------------------------------------------------------------------------------------------------------------------------------------------------------------------------------------------------------------------------------------------------------------------------------------------------------------------------------------------------------------------------------------------------------------------------------------------------------------------------------------------------------------------------------------------------------------------------------------------------------------------------------------------------------------------------------------------------------------------------------------------------------------------------------------------------------------------------------------------------------------------------------------------------------------------------------------------------------------------------------------------------------------|
| Journal:                        | <i>BMJ Open</i>                                                                                                                                                                                                                                                                                                                                                                                                                                                                                                                                                                                                                                                                                                                                                                                                                                                                                                                                                                                                                                                                                                                                                                                                                                                                                                                                                                                                                                                                                                                                                                                                                                                                                                    |
| Manuscript ID                   | bmjopen-2021-050507.R2                                                                                                                                                                                                                                                                                                                                                                                                                                                                                                                                                                                                                                                                                                                                                                                                                                                                                                                                                                                                                                                                                                                                                                                                                                                                                                                                                                                                                                                                                                                                                                                                                                                                                             |
| Article Type:                   | Original research                                                                                                                                                                                                                                                                                                                                                                                                                                                                                                                                                                                                                                                                                                                                                                                                                                                                                                                                                                                                                                                                                                                                                                                                                                                                                                                                                                                                                                                                                                                                                                                                                                                                                                  |
| Date Submitted by the Author:   | 26-Nov-2021                                                                                                                                                                                                                                                                                                                                                                                                                                                                                                                                                                                                                                                                                                                                                                                                                                                                                                                                                                                                                                                                                                                                                                                                                                                                                                                                                                                                                                                                                                                                                                                                                                                                                                        |
| Complete List of Authors:       | <p>xiao, yingqi; McMaster University, Department of Health Research Methods, Evidence and Impact; Sichuan University, West China School of Nursing / Department of Nursing, West China Hospital</p> <p>Guyatt, Gordon; McMaster University, Department of Health Research Methods, Evidence and Impact; McMaster University, Department of Medicine</p> <p>Zeng, Linan; McMaster University, Department of Health Research Methods, Evidence, and Impact; Sichuan University, Pharmacy Department/Evidence-based Pharmacy Center, West China Second University Hospital</p> <p>Jayne, David; University of Cambridge, Department of Medicine</p> <p>Merkel, PA; University of Pennsylvania, Division of Rheumatology, Department of Medicine and Division of Clinical Epidemiology, Department of Biostatistics, Epidemiology and Informatics</p> <p>Siemieniuk, Reed; McMaster University, Department of Health Research Methods, Evidence, and Impact; McMaster University, Ontario, Canada., Department of Medicine</p> <p>Dookie, Jared E ; Western University, Schulich School of Medicine and Dentistry</p> <p>A Buchan, Tayler ; McMaster University, Department of Health Research Methods, Evidence and Impact</p> <p>Ahmed, Muhammad Muneeb; McMaster University, Hamilton, Ontario, Canada., Michael G. DeGroote School of Medicine</p> <p>Couban, Rachel; McMaster University, DeGroote Institute for Pain Research and Care</p> <p>Mahr, Alfred ; Kantonsspital St Gallen, St Gallen, Switzerland., Clinic for Rheumatology</p> <p>Walsh, Michael; McMaster University, Department of Health Research Methods, Evidence and Impact; McMaster University, Ontario, Canada., Department of Medicine</p> |
| <b>Primary Subject Heading</b>: | Cardiovascular medicine                                                                                                                                                                                                                                                                                                                                                                                                                                                                                                                                                                                                                                                                                                                                                                                                                                                                                                                                                                                                                                                                                                                                                                                                                                                                                                                                                                                                                                                                                                                                                                                                                                                                                            |
| Secondary Subject Heading:      | Haematology (incl blood transfusion), Evidence based practice                                                                                                                                                                                                                                                                                                                                                                                                                                                                                                                                                                                                                                                                                                                                                                                                                                                                                                                                                                                                                                                                                                                                                                                                                                                                                                                                                                                                                                                                                                                                                                                                                                                      |
| Keywords:                       | HAEMATOLOGY, ORAL MEDICINE, Clinical trials < THERAPEUTICS                                                                                                                                                                                                                                                                                                                                                                                                                                                                                                                                                                                                                                                                                                                                                                                                                                                                                                                                                                                                                                                                                                                                                                                                                                                                                                                                                                                                                                                                                                                                                                                                                                                         |
|                                 |                                                                                                                                                                                                                                                                                                                                                                                                                                                                                                                                                                                                                                                                                                                                                                                                                                                                                                                                                                                                                                                                                                                                                                                                                                                                                                                                                                                                                                                                                                                                                                                                                                                                                                                    |

1  
2  
3  
4  
5  
6  
7  
8  
9  
10  
11  
12  
13  
14  
15  
16  
17  
18  
19  
20  
21  
22  
23  
24  
25  
26  
27  
28  
29  
30  
31  
32  
33  
34  
35  
36  
37  
38  
39  
40  
41  
42  
43  
44  
45  
46  
47  
48  
49  
50  
51  
52  
53  
54  
55  
56  
57  
58  
59  
60





I, the Submitting Author has the right to grant and does grant on behalf of all authors of the Work (as defined in the below author licence), an exclusive licence and/or a non-exclusive licence for contributions from authors who are: i) UK Crown employees; ii) where BMJ has agreed a CC-BY licence shall apply, and/or iii) in accordance with the terms applicable for US Federal Government officers or employees acting as part of their official duties; on a worldwide, perpetual, irrevocable, royalty-free basis to BMJ Publishing Group Ltd ("BMJ") its licensees and where the relevant Journal is co-owned by BMJ to the co-owners of the Journal, to publish the Work in this journal and any other BMJ products and to exploit all rights, as set out in our [licence](#).

The Submitting Author accepts and understands that any supply made under these terms is made by BMJ to the Submitting Author unless you are acting as an employee on behalf of your employer or a postgraduate student of an affiliated institution which is paying any applicable article publishing charge ("APC") for Open Access articles. Where the Submitting Author wishes to make the Work available on an Open Access basis (and intends to pay the relevant APC), the terms of reuse of such Open Access shall be governed by a Creative Commons licence – details of these licences and which [Creative Commons](#) licence will apply to this Work are set out in our licence referred to above.

Other than as permitted in any relevant BMJ Author's Self Archiving Policies, I confirm this Work has not been accepted for publication elsewhere, is not being considered for publication elsewhere and does not duplicate material already published. I confirm all authors consent to publication of this Work and authorise the granting of this licence.

1  
2  
3 **The comparative efficacy and safety of alternative glucocorticoids regimens in**  
4 **patients with ANCA-associated vasculitis: A systematic review**  
5

6  
7 Yingqi Xiao<sup>1,2</sup>, PhD , reviewer, methodologist, Gordon H Guyatt<sup>1,3</sup>, MD, professor,  
8 methodologist, Linan Zeng<sup>1,4</sup>, PhD, methodologist, David RW Jayne<sup>5</sup>, MD,  
9 nephrologist, Peter A Merkel<sup>6</sup>, MD, MPH, rheumatologist, Reed AC Siemieniuk<sup>1,3</sup>,  
10 MD, methodologist, Jared E Dookie<sup>7</sup>, B.Sc, MD, reviewer, Tayler A Buchan<sup>1</sup>, MSc,  
11 Graduate, reviewer, Muhammad M Ahmed<sup>8</sup>, BHSc, MD , reviewer, Rachel J  
12 Couban<sup>9</sup>, information specialist, Alfred Mahr<sup>10</sup>, MD, rheumatologist, Michael  
13 Walsh<sup>1,3,11</sup>, MD, nephrologist  
14  
15

16  
17  
18  
19  
20 1 Department of Health Research Methods, Evidence and Impact, McMaster  
21 University, Ontario, Canada.  
22

23  
24 2 West China School of Nursing / Department of Nursing, West China Hospital,  
25 Sichuan University, China.  
26

27  
28 3 Department of Medicine, McMaster University, Ontario, Canada.  
29

30  
31 4 Pharmacy Department/Evidence-based Pharmacy Center, West China Second  
32 University Hospital, Sichuan University, China.  
33

34  
35 5 Department of Medicine, University of Cambridge, Cambridge, United Kingdom.  
36

37  
38 6 Division of Rheumatology, Department of Medicine and Division of Clinical  
39 Epidemiology, Department of Biostatistics, Epidemiology and Informatics, University  
40 of Pennsylvania, Philadelphia, USA.  
41

42  
43 7 Schulich School of Medicine and Dentistry, Western University, Ontario, Canada.  
44

45  
46 8 Michael G. DeGroote School of Medicine, McMaster University, Hamilton,  
47 Ontario, Canada.  
48

49  
50 9 DeGroote Institute for Pain Research and Care, McMaster University, Ontario,  
51 Canada.  
52

53  
54 10 Clinic for Rheumatology, Kantonsspital St Gallen, St Gallen, Switzerland.  
55

56  
57 11 Population Health Research Institute, Hamilton Health Sciences / McMaster  
58 University, Ontario, Canada.  
59

60 Corresponding Author:

1  
2  
3 Yingqi Xiao  
4

5 West China School of Nursing  
6

7 West China Hospital  
8

9 Sichuan University  
10

11 Chengdu, Sichuan, China  
12

13 610041  
14

15 Email: xiaoyingqixyq@163.com  
16  
17  
18  
19  
20  
21  
22  
23  
24  
25  
26  
27  
28  
29  
30  
31  
32  
33  
34  
35  
36  
37  
38  
39  
40  
41  
42  
43  
44  
45  
46  
47  
48  
49  
50  
51  
52  
53  
54  
55  
56  
57  
58  
59  
60

## Abstract

### Objective

To compare the efficacy and safety of alternative glucocorticoids (GC) regimens as induction therapy for patients with antineutrophil cytoplasmic antibodies (ANCA)-associated vasculitis.

### Design

Systematic review of randomized controlled trial (RCTs).

### Data sources

Medline, Embase, Clinicaltrials.gov and Cochrane Central Register of Controlled Trials up to 10 April 2020.

### Study selection and Review methods

RCTs comparing two (or more) different dose regimens of GC in ANCA-associated vasculitis during induction of remission, regardless of other therapies. Pairs of reviewers independently screened records, extracted data and assessed risk of bias. Two reviewers rated certainty of evidence using the Grading of Recommendations Assessment, Development, and Evaluation (GRADE) approach.

### Results

Of 3912 records identified, the full texts of two records met the eligibility criteria. Due to the heterogeneity of population and dose regimen of glucocorticoids between the two trials, we descriptively presented the two trials and did not combine the results using meta-analysis. Compared with the standard-dose regimen, the reduced-dose regimen of GC may reduce death, risk difference [RD] from -1.7% to -2.1%, low certainty), while not increasing end-stage kidney disease (ESKD) (RD: from -1.5% to 0.4%, moderate certainty). The reduced-dose regimen probably has an important reduction in serious infections at 1 year (RD: from -12.8% to -5.9%, moderate certainty). The reduced-dose regimen of glucocorticoids probably has trivial or no effect in disease remission, relapse or health related quality of life (moderate to high certainty).

### Conclusions



1  
2  
3 The reduced-dose regimen of GC may reduce death at the follow-up of 6 months to  
4 longer than 1 year and serious infections while not increasing ESKD.  
5  
6

7 **Systematic review registration**  
8

9 PROSPERO CRD42020179087.  
10

11 **Keywords:** Glucocorticoids, Anti-Neutrophil Cytoplasmic Antibody-Associated  
12 Vasculitis, Systematic review  
13  
14

15  
16 Word count for the main text: 3079  
17  
18

19  
20  
21 **Strengths and limitations of this study**  
22

- 23  
24 - This systematic review included a comprehensive search of literatures without  
25 limitation on language.  
26  
27 - This systematic review applied GRADE approach assessing the quality of  
28 evidence.  
29  
30 - This systematic review included the largest global trial and the latest trial on the  
31 subject so far that have improved the generalizability of the results through the  
32 efforts of national and international vasculitis networks and extensive selection  
33 criteria.  
34  
35 - Despite the excellent methodological quality, the two eligible trials were open  
36 labeled and were subject to bias.  
37  
38  
39  
40  
41  
42  
43  
44  
45  
46  
47  
48  
49  
50  
51  
52  
53  
54  
55  
56  
57  
58  
59  
60

## Introduction

Antineutrophil cytoplasmic antibodies (ANCA) -associated vasculitis (AAV) comprises a subgroup of systemic vasculitis affecting small- to medium-sized vessels, a chronic inflammatory disease of the blood vessel wall<sup>1</sup>, and includes granulomatosis with polyangiitis, microscopic polyangiitis, and eosinophilic granulomatosis with polyangiitis.<sup>2</sup> Patients with AAV usually test positive for ANCA. The cause of the disease remains unclear. Genetic and environmental factors play an important role in the onset of the disease.<sup>3,4</sup> The annual incidence of AAV is about 20 per million inhabitants, and the prevalence is about 100 per million inhabitants.<sup>5</sup> AAV has multiple clinical manifestations, characterized by leukocytes infiltrating the vessel walls, fibrinoid necrosis, and vascular damage with occlusion or aneurysm formation.<sup>6</sup> The severity of AAV varies greatly.<sup>7</sup> The most common manifestation is glomerulonephritis, which leads to renal failure and alveolar capillaritis causing pulmonary hemorrhage.<sup>8</sup> Previous studies have showed that untreated AAV is typically fatal<sup>9</sup>, with 6-month and 1-year mortality rates of 60% and 80%, respectively.<sup>10</sup>

Since the 1950s, glucocorticoids (GCs), as immunosuppressants and anti-inflammatory drugs with a fast-acting and powerful anti-inflammatory effect, became the basis of therapy for AAV.<sup>11,12</sup> The main mechanism of action is genomic and non-genomic effects mediated by cytosolic GC receptors or specific and non-specific interactions with membrane-bound GC receptors resulting in reduced production of pro-inflammatory proteins (transrepression).<sup>13</sup> However, monotherapy has incomplete efficacy.<sup>14</sup> Subsequently, standard therapy emerged using the combination of high-dose GC and cyclophosphamide to achieve remission in AAV.<sup>15,16,17</sup> This combination therapy proved to reduce mortality to 25% at 5 years and has high remission rates of 80% – 90%.<sup>18</sup> In addition to cyclophosphamide, clinical remission can also be achieved with rituximab-based or methotrexate-based therapies.<sup>19</sup> Although the combination of high-dose GC and cytotoxic drugs greatly enhances the therapeutic efficacy, high-dose GC may increase the toxicity associated with treatment. Infections and cardiovascular diseases due to the treatment are main causes of fatal side effects that reduced quality of life (QOL) in patients.<sup>20, 21</sup> Previous studies

1  
2  
3 have shown that lower GC doses during the induction period were associated with  
4 higher relapse rates and longer term of GC use that might expose patients to the  
5 potential toxicity of high-cumulative GC.<sup>22,23</sup>  
6  
7  
8  
9

10  
11 The purpose of this systematic review is to evaluate the comparative efficacy and  
12 safety of alternative GC regimens (two or more different doses of GC) in patients with  
13 ANCA-associated vasculitis. Our systematic review is part of a BMJ Rapid  
14 Recommendations project, which is based on the shared vision of the MAGIC  
15 Evidence Ecosystem Foundation ([www.magicproject.org](http://www.magicproject.org)) and The BMJ. The  
16 systematic review informed an associated BMJ Rapid Recommendations. (to cite the  
17 guideline paper).  
18  
19  
20  
21  
22  
23  
24  
25  
26

## 27 **Methods**

### 28 **Registration and report**

29  
30 A priori protocol of this systematic review is presented at PROSPERO  
31 (CRD42020179087). We reported this systematic review and meta-analysis based on  
32 the PRISMA (Preferred Reporting Items for Systematic Reviews and Meta-Analyses)  
33 statement (see Appendix 1).<sup>24</sup>  
34  
35  
36  
37  
38  
39  
40

### 41 **Patient and public involvement**

42  
43 According to the process of the BMJ Rapid Recommendations, the guideline panel on  
44 this target provides critical process oversight and content guidance for the systematic  
45 review. The guideline panel consisted of clinicians, methodologists, pharmacists,  
46 patient partners with AAV and caregiver partners. Patients received relevant training  
47 and support to meet patient involvement content throughout the guideline  
48 development process, including critical feedback on outcome and subgroup selection,  
49 GRADE judgments, and manuscript feedback.  
50  
51  
52  
53  
54  
55  
56  
57  
58

### 59 **Study selection**

1  
2  
3 We included studies of patients with a diagnosis of active AAV. AAV was defined as  
4 the following categories according to the Chapel Hill Consensus Conference 2012  
5 classification method: microscopic polyangiitis (MPA), granulomatosis with  
6 polyangiitis (GPA), eosinophilic granulomatosis with polyangiitis (EGPA, Churg-  
7 Strauss syndrome).<sup>25</sup> In addition, single organ damage AAV (eg, renal limited  
8 vasculitis (RLV) or idiopathic rapidly progressive glomerulonephritis (RPGN)) could  
9 be considered the fourth entity, although in practice it eventually corresponds to the  
10 kidney-limited form of MPA or GPA.<sup>26</sup>  
11  
12  
13  
14  
15  
16  
17  
18  
19

20 Eligible studies were defined as comparing two or more doses of GC in patients with  
21 AAV during induction of remission, regardless of the use of other therapies. Other  
22 therapies included, and not limited to cyclophosphamide, azathioprine, rituximab,  
23 methotrexate, mycophenolate mofetil and plasma exchange. We included only RCTs.  
24 Outcomes of interest included death, ESKD, serious infections, serious adverse events  
25 other than serious infections, sustained remission and any other patient-important  
26 outcomes. The time point for the outcome assessment depended on what was  
27 specified in original trials.  
28  
29  
30  
31  
32  
33  
34  
35  
36

### 37 **Data sources and searches**

38  
39 A professional medical librarian developed a literature search strategy and searched  
40 Medline, Embase, Clinicaltrials.gov and Cochrane Central Register of Controlled  
41 Trials (CENTRAL) for relevant studies from the inception to 10 April 2020 with no  
42 restriction on language. Appendix 2 presents the literature search strategies and  
43 results. We also reviewed the reference lists of included studies for additional  
44 references. Pairs of reviewers (YX, JD, TB, MA) independently screened titles and  
45 abstracts, and reviewed the full texts of potentially eligible studies to determine the  
46 final eligible studies. Disagreements were resolved by discussion. To ensure the  
47 validity and consistency of the process, we provided reviewers with review instruction  
48 and conducted calibration exercises before the formal start of each process.  
49  
50  
51  
52  
53  
54  
55  
56  
57  
58  
59

### 60 **Data extraction and risk of bias assessment**

1  
2  
3 We collected data through a predesigned excel extraction form. Pairs of reviewers  
4 (YX, JD, TB, MA) extracted data independently. We resolved disagreements by  
5 discussion. For each eligible study, we collected the following: country/region, design  
6 of the study, patient characteristics (mean age, sex and disease diagnosis), treatment  
7 strategy, outcomes and measures, and follow-up duration. Pair of reviewers (YX, JD,  
8 TB, MA) independently assessed the risk of bias of each RCT using a  
9 revised Cochrane risk of bias tool that includes sequence generation, concealment of  
10 allocation, blinding (participants, personnel, and outcome assessors), loss to follow-  
11 up, selective outcome reporting and other potential sources of bias.<sup>27</sup> The reviewers  
12 judged each criterion as definitely or probably low risk of bias, or probably or  
13 definitely high risk of bias.  
14  
15  
16  
17  
18  
19  
20  
21  
22  
23  
24

### 25 **Data synthesis or analysis, and grading of evidence**

26  
27 For continuous outcomes, we used inverse variance statistical method to calculate  
28 mean difference (MD) and 95% confidence interval (CI). For binary outcomes, we  
29 used the Mantel–Haenszel statistical method to calculate risk ratio (RR) and 95% CI.  
30 We conservatively used a priori random effects model assuming a great variability in  
31 treatment effects across the study. We used the  $I^2$  statistic to assess statistical  
32 heterogeneity. When the effect-estimated  $I^2$  value was >30%, we attempted to  
33 determine the reason for the heterogeneity. We set significance at P=0.05 and used  
34 RevMan version 5.3 for all statistical analyses.  
35  
36  
37  
38  
39  
40  
41  
42  
43  
44

45 We used the GRADE approach<sup>28</sup> to assess the quality of evidence at outcome level by  
46 two reviewers (LZ and YX). We focused on the grading of the following outcomes  
47 after our team discussion: death, ESKD, serious infections, serious adverse events,  
48 and health-related quality of life. Disagreements were resolved by discussion or  
49 through a third reviewer (GHG) adjudication. We summarized the quality of evidence  
50 in GRADE summary of findings using the MAGICapp platform.<sup>29,30</sup>  
51  
52  
53  
54  
55  
56  
57

### 58 **Results**

## Literature search

The search yielded, after removal of duplicates, 3912 records, 38 of which were considered for full-text review. The PRISMA flow chart (Figure 1), presents the reasons for excluding studies at the stage of full text screening. Ultimately, two RCTs met the inclusion criteria.<sup>18,31</sup> The full text of one of the two RCTs<sup>18</sup> was published after our initial submission of this systematic review. We updated our results after the full text was published.

## Included studies

The RCT by Walsh et al<sup>31</sup> was a multicenter trial including 704 patients with severe AAV at 95 centers in 16 countries (median duration of follow-up 2.9 years). Eligible patients were 15 years of age or older, had new or relapsing granulomatosis with polyangiitis or microscopic polyangiitis, and kidney involvement or pulmonary involvement. This study was a 2-by-2 factorial design and compared the efficacy of plasma exchange with or without plasma exchange for AAV, as well as the efficacy of a reduced-dose regimen and a standard-dose regimen of GC over the first 6 months of the treatment period. The two regimens of oral GC, specifically, patients in the reduced-dose regimen and standard-dose regimen received the same treatment in the first week —the dose was determined according to the patients' weight (50.0 mg/<50 kg, 60.0 mg/50 to 75 kg, 75.0 mg/> 75 kg). The reduced-dose regimen and the standard-dose regimen began to decrease gradually in the second and third weeks, respectively. Finally, at the 6<sup>th</sup> month, the cumulative dose of oral GC in the reduced-dose regimen was less than 60% of the standard-dose regimen. (Table 1)

The RCT by Furuta et al<sup>18</sup> was a multicenter trial enrolling 140 patients with newly diagnosed AAV at 34 centers in Japan (with a follow-up of 6 months). Patients with severe glomerulonephritis or pulmonary hemorrhage were excluded. This trial evaluated whether a low-dose GC regimen (initial dose at 0.5 mg/kg/day) was non-inferior to a high-dose regimen (initial dose at 1.0 mg/kg/day) in efficacy when combined with rituximab for the treatment of AAV. In the low-dose group, prednisolone was discontinued at 5 months, while in the high-dose group,

1  
2  
3 prednisolone was reduced to 10.0 mg/ day until 6 months. (Table 1)  
4  
5  
6  
7  
8  
9  
10  
11  
12  
13  
14  
15  
16  
17  
18  
19  
20  
21  
22  
23  
24  
25  
26  
27  
28  
29  
30  
31  
32  
33  
34  
35  
36  
37  
38  
39  
40  
41  
42  
43  
44  
45  
46  
47  
48  
49  
50  
51  
52  
53  
54  
55  
56  
57  
58  
59  
60

For peer review only

1  
2  
3  
4  
5  
6  
7  
8  
9  
10  
11  
12  
13  
14  
15  
16  
17  
18  
19  
20  
21  
22  
23  
24  
25  
26  
27  
28  
29  
30  
31  
32  
33  
34  
35  
36  
37  
38  
39  
40  
41  
42  
43  
44  
45  
46

**Table 1: Characteristics of eligible randomized controlled trials**

| Author, Year                       | Name of the study (ClinicalTrials.gov number) | Country             | Study design                                    | Intervention and comparison (No. of patients)                                                                                                                                                         | Patients                                                           | Outcomes                                                                                                                                                                                                                                |
|------------------------------------|-----------------------------------------------|---------------------|-------------------------------------------------|-------------------------------------------------------------------------------------------------------------------------------------------------------------------------------------------------------|--------------------------------------------------------------------|-----------------------------------------------------------------------------------------------------------------------------------------------------------------------------------------------------------------------------------------|
| Walsh et al. (2020) <sup>31</sup>  | PEXIVAS (NCT00987389)                         | Multiple countries  | Phase III, randomized, open label, 704 patients | Intervention: reduced-dose GC therapy (initial dose : 50-75mg; maintenance dose continues at 5mg/day from the end of week 23 until at least week 52; accumulative dose less than 60% of the standard) | 353 patients with severe AAV (mean age 63 years, 44% female)       | Primary outcome: a composite of death from any cause or ESKD.<br><br>Secondary outcomes: death from any cause, ESKD, sustained remission, serious adverse events, serious infections within 1 year, and health-related quality of life. |
|                                    |                                               |                     |                                                 | Comparison: standard-dose GC therapy (initial dose : 50-75mg; maintenance dose continues at 5mg/day from the end of week 23 until at least week 52)                                                   | 351 patients with severe AAV (mean age 63 years, 43% female)       |                                                                                                                                                                                                                                         |
| Furuta et al. (2021) <sup>18</sup> | LoVAS ( NCT02198248)                          | Japan, multicentric | Phase IV, randomized, open label, 140 patients  | Intervention : low-dose GC treatment (initial dose : 0.5mg/kg/day; discontinued at 5 months)                                                                                                          | 70 patients with new diagnosis of AAV (median age: 73; 43% female) | Primary outcome: remission rate at 6 months.<br><br>Secondary outcomes: time to remission, death, relapse, ESKD and the first serious adverse event, proportion of death, relapse and ESKD                                              |



|  |  |  |  |                                                                                                  |                                                                    |                           |
|--|--|--|--|--------------------------------------------------------------------------------------------------|--------------------------------------------------------------------|---------------------------|
|  |  |  |  | Comparison : high-dose GC treatment (initial dose : 1mg/kg/day; reduced to 10mg/day by 5 months) | 70 patients with new diagnosis of AAV (median age: 74; 37% female) | for efficacy at 6 months. |
|--|--|--|--|--------------------------------------------------------------------------------------------------|--------------------------------------------------------------------|---------------------------|

AAV: antineutrophil cytoplasmic antibodies associated vasculitis; Ges: glucocorticoids. ESKD: end-stage kidney disease.

### **Risk of bias**

Both trials were open-label trials and patients and investigators were aware of the group assignments due to the complexity of the GC regimen. However, due to the objective, easily ascertained nature of the outcomes, the lack of blinding may introduce minimal bias. Considering the low risk of bias in the other domains, overall risk of bias of both trials was low (Appendix 3).

### **Effect of interventions**

Due to the heterogeneity in the population and in the regimens of glucocorticoids between the two trials, we descriptively presented the two trials and did not combine the results using meta-analysis. Since the results of Walsh's study<sup>31</sup> showed no interaction between the GC regimen and the plasma exchange, we only focus on the use of GC in conjunction with the purpose of this review.

Appendix 4 summarizes the GRADE summary of findings for these two trials. Compared with standard-dose regimen, reduced-dose regimen of GC may reduce death in both newly diagnosed and severe ANCA-associated vasculitis (risk difference [RD]: from -1.7% to -2.1%, low certainty), while probably not increasing ESKD in either newly diagnosed or severe ANCA-associated vasculitis (RD: from -1.5% to 0.4%, moderate certainty). The rate of serious infections at six months to one year in the reduced-dose regimen tended to be lower than in the standard-dose regimen in both newly diagnosed and severe ANCA-associated vasculitis (RD: from -12.8% to -5.9%, moderate certainty). The PEXIVAS trial showed reduced-dose regimen might increase the risk of serious adverse events in a follow-up period of longer than one year (RD: 3.1%, 95% CI -3.7% to 11.2%) while the LoVAS trial showed reduced-dose regimen might reduce the risk at 6 month (RD: -18.1%, 95% CI -33% to 3.2%). We are uncertain about the effect of reduced-dose regimen on serious adverse events (Very low certainty). Reduced-dose regimen of glucocorticoids probably has trivial or no effect in disease remission, relapse or health related quality of life (Moderate to high certainty).

## Discussion

After full text screening, we identified 2 RCTs<sup>18,31</sup> involving 844 patients that met our selection criteria for studies comparing different dose regimens of GC for the treatment of AAV. According to this systematic review, the results of the absolute effects of low certainty of evidence showed that reduced-dose regimen of GC may reduce death at a follow-up from 6 months to longer than 1 year, while not increasing the risk of ESKD (moderate certainty) among patients with AAV when compared with standard-dose regimen.

In addition, relative to the standard-dose regimen, moderate certainty of evidence indicated that the reduced-dose regimen probably has an important reduction in serious infections in both newly diagnosed and severe AAV at 6 months to 1 year (moderate certainty). This study showed that reduced-dose regimen does have an obvious advantage in reducing infections, which echoes previous studies.<sup>17,32</sup> Jayne et al. reported that when high-dose GC was used, infection was most common in the first 6 months of treating severe renal vasculitis.<sup>17</sup> Considering that the most common cause of death more than one year after diagnosis of AAV was infection or uncontrolled vasculitis.<sup>16,33,34,35</sup> the reduction in risk of serious infections explained the possible reduction of mortality by reduced dose-regimen of GC.

We are, however, uncertain about the effect of the reduced dose regimen of GC on other serious adverse events. While Furuta et al's trial showed a significant reduction in serious adverse events by reduced-dose regimen,<sup>18</sup> Walsh et al's trial showed the reduced-dose regimen might increase the risk with a wide CI.<sup>31</sup> In Walsh et al's trial, although the reduced-dose regimen of GC had more renal or urinary adverse events than the standard-dose regimen of GC, there was no significant difference in the incidence of ESKD between the two regimen groups. This may be related to the treatment status of the included patients. Among the patients included in Walsh et al's trial, the number of patients who had undergone dialysis before the beginning of the trial in the standard-dose regimen group was more than that in the reduced-dose regimen group.

1  
2  
3  
4  
5  
6 The use of GC transformed AAV from an almost uniformly fatal condition to one  
7 characterized by remissions and relapses complicated by drug-induced adverse events.  
8  
9 Despite the ubiquitous use of GC for AAV, there was no standardization of dose  
10 regimens, guidelines were ambiguous and practice patterns varied substantially. The  
11 two trials <sup>18,31</sup> highlights the need to optimize the dose of GC. Although the two trials  
12 found one regimen of GC might be superior over another, further research is needed  
13 to determine whether the GC regimen can be further improved for the treatment of  
14 AAV.  
15  
16  
17  
18  
19  
20  
21

22 The advantages of this systematic review include a comprehensive search of emerging  
23 and past evidence across databases without being restricted by study design or  
24 publication language, and the use of GRADE approach to assess the quality of  
25 evidence. Decisions regarding eligible studies, data extraction, and risk of bias  
26 assessments were all performed in duplicate, and calibration exercises were conducted  
27 before the formal start of the project. By excluding non-RCT studies, we limited the  
28 risk of bias. The RCTs we included are of sound methodological quality.  
29  
30  
31  
32  
33  
34  
35  
36  
37

38 Our systematic review also has some limitations. First, only two trials were included  
39 and although they were broadly inclusive and contained more events than any other  
40 trial in this disease, the total sample size was still not large. This is particularly  
41 obvious for serious adverse events. However, the reduced-dose GC regimen should  
42 not result in more treatment related adverse events (i.e. it is illogical that a lower  
43 exposure to GC would have anything but the same or lower rate of GC caused side  
44 effects) and there is reasonable precision around the efficacy outcomes. This  
45 limitation is expected to result in an underappreciation of the benefits of reducing the  
46 GC dose that is supported by observational studies of GC which suggested reducing  
47 GC exposure may also reduce fractures, peptic ulcer disease, psychiatric disease,  
48 weight gain and dysglycemia. In addition, despite the excellent methodological  
49 quality of the included trials, they were open label trials and were subject to biases.  
50 Despite the LoVAS trial enrolled patients with newly diagnosed AAV, due to the  
51 limited sample size of this trial, the extent to which the results can be generalized to  
52  
53  
54  
55  
56  
57  
58  
59  
60

1  
2  
3 patients with non-severe AAV is uncertain. But at least, it is likely safer to extrapolate  
4 the safety of the regimen from more severe to less severe patients rather than from  
5 less severe to more severe patients.  
6  
7  
8  
9

## 10 11 **Conclusion**

12  
13 An important general rule is that in routine clinical practice, the use of conventional  
14 GC should be “as much as necessary, but as little as possible.”<sup>36</sup> Compared with the  
15 standard-dose regimen, the reduced-dose regimen of GC may reduce death, probably  
16 has little or no effect on ESKD among patients with AAV, and resulted in a lower risk  
17 of serious infections at 6 months to 1 year. But the overall effect of reduce-dose  
18 regimen of GC on serious adverse events is uncertain.  
19  
20  
21  
22  
23  
24  
25

26  
27 Acknowledgements: We thank members of the Rapid Recommendations panel for  
28 critical feedback on outcome and subgroup selection, GRADE judgments, and  
29 manuscript feedback.  
30  
31  
32

33 Contributors: MW, AM, DJ, PM and GHG conceived of the study idea. RC  
34 performed the literature search. YX, JD, TB and MA performed the screening, data  
35 abstraction, and risk of bias assessments. YX, LZ and MW performed the data  
36 analysis. YX, GHG, LZ, RS, DJ, PM and MW interpreted the data. YX, GHG and LZ  
37 performed the certainty assessment. YX, GHG, LZ and MW drafted the manuscript.  
38 All authors critically revised the manuscript. All authors approved the final version of  
39 the manuscript. YX and MW had full access to the data in the study and takes  
40 responsibility for the integrity of the data and the accuracy of the data analysis. YX  
41 and MW are the guarantors.  
42  
43  
44  
45  
46  
47  
48

49 Funding: This work was supported by China Scholarship Council grant number  
50 201906240082.  
51

52 Competing Interests: There are no competing interests for any author.

53 Ethical approval statement: Not required.

54 Patient consent statement: Not required.

55 Provenance and peer review statement: Not commissioned; externally peer reviewed.

56 Data sharing statement: No data are available.  
57  
58  
59  
60

1  
2  
3 Transparency statement: YX and MW affirm that the manuscript is an honest,  
4 accurate, and transparent account of the recommendation being reported; that no  
5 important aspects of the recommendation have been omitted; and that any  
6 discrepancies from the recommendation as planned (and, if relevant, registered) have  
7 been explained.  
8  
9  
10  
11

12 Figure legend PRISMA flow chart of literature search and screening process  
13  
14

## 15 References

- 17 1. Houben E, Penne EL, Voskuyl AE, et al.. Cardiovascular events in anti-neutrophil cytoplasmic  
18 antibody-associated vasculitis: a meta-analysis of observational studies. *Rheumatology (Oxford)*  
19 2018;57(3):555-562.
- 21 2. Bosch X, Guilabert A, Font J. Antineutrophil cytoplasmic antibodies. *Lancet* 2006;368(9533):404-  
22 41816876669.
- 23 3. Wallace ZS, Miloslavsky EM. Management of ANCA associated vasculitis. *BMJ* 2020;368:m421.
- 24 4. Jennette JC, Falk RJ. Pathogenesis of antineutrophil cytoplasmic autoantibody-mediated disease. *Nat*  
25 *Rev Rheumatol* 2014;10:463-73.
- 26 5. Salvador F. ANCA Associated Vasculitis. *Eur J Intern Med* 2020;74:18-28.
- 27 6. Smith RM. Update on the treatment of ANCA associated vasculitis. *Presse Med* 2015;44(6 Pt  
28 2):e241-9.
- 29 7. Hoffman GS, Kerr GS, Leavitt RY, et al. Wegener granulomatosis: an analysis of 158 patients. *Ann*  
30 *Intern Med* 1992;116:488-98.
- 31 8. Walsh M, Merkel PA, Peh CA, et al.; PEXIVAS Investigators. Plasma exchange and glucocorticoid  
32 dosing in the treatment of anti-neutrophil cytoplasm antibody associated vasculitis (PEXIVAS):  
33 protocol for a randomized controlled trial. *Trials* 2013;14:73.
- 34 9. Keller SF, Miloslavsky EM. Corticosteroids in Antineutrophil Cytoplasmic Antibody-Associated  
35 Vasculitis. *Rheum Dis Clin North Am* 2016;42(1):91-101.
- 36 10. Booth AD, Almond MK, Burns A, et al., Pan-Thames Renal Research Group. Outcome of ANCA-  
37 associated renal vasculitis: a 5-year retrospective study. *Am J Kidney Dis* 2003; 41(4):776-84.
- 38 11. Jennette JC, Falk RJ. Small-vessel vasculitis. *N Engl J Med* 1997;337(21):1512–23.
- 39 12. Lally L, Spiera R. Current landscape of antineutrophil cytoplasmic antibody-associated vasculitis:  
40 classification, diagnosis, and treatment. *Rheum Dis Clin North Am* 2015;41(1):1–19, vii.
- 41 13. Stahn C, Buttgerit F. Genomic and nongenomic effects of glucocorticoids. *Nat Clin Pract*  
42 *Rheumatol* 2008;4:525-33.
- 43 14. Walton EW. Giant-cell granuloma of the respiratory tract (Wegener' s granulomatosis). *Br Med J*  
44 1958;2:265-70.
- 45 15. de Groot K , Harper L , Jayne DR , et al . Pulse versus daily oral cyclophosphamide for induction of  
46 remission in antineutrophil cytoplasmic antibody-associated vasculitis: a randomized trial. *Ann Intern*  
47 *Med* 2009;150:670–80.
- 48 16. De Groot K , Rasmussen N , Bacon PA , et al . Randomized trial of cyclophosphamide versus  
49 methotrexate for induction of remission in early systemic antineutrophil cytoplasmic antibody-  
50  
51  
52  
53  
54  
55  
56  
57  
58  
59  
60

- 1  
2  
3 associated vasculitis. *Arthritis Rheum* 2005;52:2461–9.
- 4  
5 17. Jayne DR , Gaskin G , Rasmussen N , et al . Randomized trial of plasma exchange or high-dosage  
6 methylprednisolone as adjunctive therapy for severe renal vasculitis. *J Am Soc Nephrol* 2007;18:2180–  
7 8.
- 8  
9 18. Furuta S, Nakagomi D, Kobayashi Y, et al. Effect of Reduced-Dose vs High-Dose  
10 Glucocorticoids Added to Rituximab on Remission Induction in ANCA-Associated Vasculitis: A  
11 Randomized Clinical Trial. *JAMA*. 2021;325(21):2178–2187.
- 12  
13 19. Keller SF, Miloslavsky EM. Corticosteroids in Antineutrophil Cytoplasmic Antibody-Associated  
14 Vasculitis. *Rheum Dis Clin North Am* 2016;42(1):91-101.
- 15  
16 20. Flossmann O , Berden A , de Groot K , et al . Long-term patient survival in ANCA-associated  
17 vasculitis. *Ann Rheum Dis* 2011;70:488–94.
- 18  
19 21. Furuta S , Chaudhry AN , Hamano Y , et al . Comparison of phenotype and outcome in microscopic  
20 polyangiitis between Europe and Japan. *J Rheumatol* 2014;41:325–33.
- 21  
22 22. Walsh M , Merkel PA , Mahr A , et al . Effects of duration of glucocorticoid therapy on relapse rate  
23 in antineutrophil cytoplasmic antibody-associated vasculitis: a meta-analysis. *Arthritis Care Res*  
24 2010;62:1166–73.
- 25  
26 23. Wada T , Hara A , Arimura Y , et al . Risk factors associated with relapse in Japanese patients with  
27 microscopic polyangiitis. *J Rheumatol* 2012;39:545–51.
- 28  
29 24. Moher D, Liberati A, Tetzlaff J, et al.; PRISMA Group. Preferred reporting items for systematic  
30 reviews and meta-analyses: the PRISMA statement. *J Clin Epidemiol* 2009;62:1006-12.
- 31  
32 25. Salvador F. ANCA associated vasculitis. *Eur J Intern Med* 2020;74:18-28.
- 33  
34 26. Pagnoux C. Updates in ANCA-associated vasculitis. *Eur J Rheumatol* 2016;3(3):122-133.
- 35  
36 27. Guyatt G, Busse JW. Risk of bias in randomized trials. *GROWTH Evidence*; 2016. Available:  
37 <https://growthevidence.com/gordon-h-guyatt-md-msc-and-jason-w-busse-dc-phd> (accessed 2020 April.  
38 6).
- 39  
40 28. Guyatt G, Oxman AD, Akl EA, et al. GRADE guidelines: 1. Introduction-GRADE evidence  
41 profiles and summary of findings tables. *J Clin Epidemiol* 2011; 64: 383-94.
- 42  
43 29. Guyatt GH, Oxman AD, Santesso N, et al. GRADE guidelines: 12. Preparing summary of findings  
44 tables-binary outcomes. *J Clin Epidemiol* 2013;66:158-72.
- 45  
46 30. Guyatt GH, Thorlund K, Oxman AD, et al. GRADE guidelines: 13. Preparing summary of findings  
47 tables and evidence profiles-continuous outcomes. *J Clin Epidemiol* 2013;66:173-83.
- 48  
49 31. Walsh M, Merkel PA, Peh CA, et al. Plasma Exchange and Glucocorticoids in Severe ANCA-  
50 Associated Vasculitis. *N Engl J Med* 2020;382(7):622-631.
- 51  
52 32. Illei GG, Yarboro CH, Kuroiwa T, et al.. Long-term effects of combination treatment with  
53 fludarabine and low-dose pulse cyclophosphamide in patients with lupus nephritis. *Rheumatology*  
54 (Oxford) 2007;46:952–956.
- 55  
56 33. Flossmann O, Berden A, de Groot K, et al., European Vasculitis Study Group. Long-term patient  
57 survival in ANCA-associated vasculitis. *Ann Rheum Dis* 2011;70:488-94.
- 58  
59 34. Jones RB, Tervaert JWC, Hauser T, et al. Rituximab versus cyclophosphamide in ANCA-  
60 associated renal vasculitis. *N Engl J Med* 2010;363(3):211-20.
35. Jayne D, Rasmussen N, Andrassy K, et al.; European Vasculitis Study Group: A randomized trial  
of maintenance therapy for vasculitis associated with antineutrophil cytoplasmic autoantibodies. *N  
Engl J Med* 349 : 36 –44, 2003.

1  
2  
3  
4  
5  
6  
7  
8  
9  
10  
11  
12  
13  
14  
15  
16  
17  
18  
19  
20  
21  
22  
23  
24  
25  
26  
27  
28  
29  
30  
31  
32  
33  
34  
35  
36  
37  
38  
39  
40  
41  
42  
43  
44  
45  
46  
47  
48  
49  
50  
51  
52  
53  
54  
55  
56  
57  
58  
59  
60

36. Buttgereit F, Burmester GR, Lipworth BJ. Optimised glucocorticoid therapy: the sharpening of an old spear. *Lancet* 2005;365(9461):801-3.

For peer review only



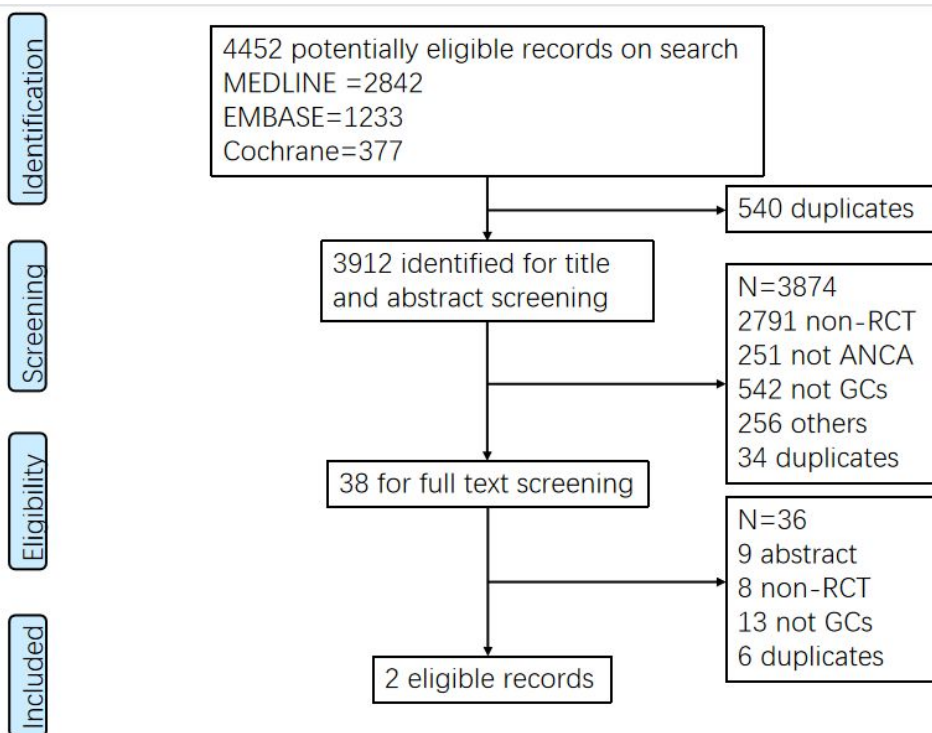

**Figure 1 PRISMA flow chart of literature search and screening process**  
 RCT:randomized controlled trial; ANCA:Antineutrophil cytoplasmic antibodies; GCs:glucocorticoids

review only

1  
2  
3  
4  
5  
6  
7  
8  
9  
10  
11  
12  
13  
14  
15  
16  
17  
18  
19  
20  
21  
22  
23  
24  
25  
26  
27  
28  
29  
30  
31  
32  
33  
34  
35  
36  
37  
38  
39  
40  
41

Identification  
Screening  
Eligibility  
Included



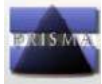

# PRISMA 2009 Checklist

| Section/topic                      | #  | Checklist item                                                                                                                                                                                                                                                                                              | Reported on page # |
|------------------------------------|----|-------------------------------------------------------------------------------------------------------------------------------------------------------------------------------------------------------------------------------------------------------------------------------------------------------------|--------------------|
| <b>TITLE</b>                       |    |                                                                                                                                                                                                                                                                                                             |                    |
| Title                              | 1  | Identify the report as a systematic review, meta-analysis, or both.                                                                                                                                                                                                                                         | 1-2                |
| <b>ABSTRACT</b>                    |    |                                                                                                                                                                                                                                                                                                             |                    |
| Structured summary                 | 2  | Provide a structured summary including, as applicable: background; objectives; data sources; study eligibility criteria, participants, and interventions; study appraisal and synthesis methods; results; limitations; conclusions and implications of key findings; systematic review registration number. | 3-4                |
| <b>INTRODUCTION</b>                |    |                                                                                                                                                                                                                                                                                                             |                    |
| Rationale                          | 3  | Describe the rationale for the review in the context of what is already known.                                                                                                                                                                                                                              | 5-6                |
| Objectives                         | 4  | Provide an explicit statement of questions being addressed with reference to participants, interventions, comparisons, outcomes, and study design (PICOS).                                                                                                                                                  | 6                  |
| <b>METHODS</b>                     |    |                                                                                                                                                                                                                                                                                                             |                    |
| Protocol and registration          | 5  | Indicate if a review protocol exists, if and where it can be accessed (e.g., Web address), and, if available, provide registration information including registration number.                                                                                                                               | 6                  |
| Eligibility criteria               | 6  | Specify study characteristics (e.g., PICOS, length of follow-up) and report characteristics (e.g., years considered, language, publication status) used as criteria for eligibility, giving rationale.                                                                                                      | 7                  |
| Information sources                | 7  | Describe all information sources (e.g., databases with dates of coverage, contact with study authors to identify additional studies) in the search and date last searched.                                                                                                                                  | 7                  |
| Search                             | 8  | Present full electronic search strategy for at least one database, including any limits used, such that it could be repeated.                                                                                                                                                                               | 7                  |
| Study selection                    | 9  | State the process for selecting studies (i.e., screening, eligibility, included in systematic review, and, if applicable, included in the meta-analysis).                                                                                                                                                   | 8                  |
| Data collection process            | 10 | Describe method of data extraction from reports (e.g., piloted forms, independently, in duplicate) and any processes for obtaining and confirming data from investigators.                                                                                                                                  | 7-8                |
| Data items                         | 11 | List and define all variables for which data were sought (e.g., PICOS, funding sources) and any assumptions and simplifications made.                                                                                                                                                                       | 7-8                |
| Risk of bias in individual studies | 12 | Describe methods used for assessing risk of bias of individual studies (including specification of whether this was done at the study or outcome level), and how this information is to be used in any data synthesis.                                                                                      | 8                  |
| Summary measures                   | 13 | State the principal summary measures (e.g., risk ratio, difference in means).                                                                                                                                                                                                                               | 8                  |
| Synthesis of results               | 14 | Describe the methods of handling data and combining results of studies, if done, including measures of consistency (e.g., $I^2$ ) for each meta-analysis.                                                                                                                                                   | 8                  |



# PRISMA 2009 Checklist

| Section/topic                 | #  | Checklist item                                                                                                                                                                                           | Reported on page # |
|-------------------------------|----|----------------------------------------------------------------------------------------------------------------------------------------------------------------------------------------------------------|--------------------|
| Risk of bias across studies   | 15 | Specify any assessment of risk of bias that may affect the cumulative evidence (e.g., publication bias, selective reporting within studies).                                                             | 8                  |
| Additional analyses           | 16 | Describe methods of additional analyses (e.g., sensitivity or subgroup analyses, meta-regression), if done, indicating which were pre-specified.                                                         | 8                  |
| <b>RESULTS</b>                |    |                                                                                                                                                                                                          |                    |
| Study selection               | 17 | Give numbers of studies screened, assessed for eligibility, and included in the review, with reasons for exclusions at each stage, ideally with a flow diagram.                                          | 9                  |
| Study characteristics         | 18 | For each study, present characteristics for which data were extracted (e.g., study size, PICOS, follow-up period) and provide the citations.                                                             | 9-12               |
| Risk of bias within studies   | 19 | Present data on risk of bias of each study and, if available, any outcome level assessment (see item 12).                                                                                                | 13                 |
| Results of individual studies | 20 | For all outcomes considered (benefits or harms), present, for each study: (a) simple summary data for each intervention group (b) effect estimates and confidence intervals, ideally with a forest plot. | 9-12               |
| Synthesis of results          | 21 | Present results of each meta-analysis done, including confidence intervals and measures of consistency.                                                                                                  | 13-17              |
| Risk of bias across studies   | 22 | Present results of any assessment of risk of bias across studies (see Item 15).                                                                                                                          | 13-17              |
| Additional analysis           | 23 | Give results of additional analyses, if done (e.g., sensitivity or subgroup analyses, meta-regression [see Item 16]).                                                                                    | 13-17              |
| <b>DISCUSSION</b>             |    |                                                                                                                                                                                                          |                    |
| Summary of evidence           | 24 | Summarize the main findings including the strength of evidence for each main outcome; consider their relevance to key groups (e.g., healthcare providers, users, and policy makers).                     | 18-19              |
| Limitations                   | 25 | Discuss limitations at study and outcome level (e.g., risk of bias), and at review-level (e.g., incomplete retrieval of identified research, reporting bias).                                            | 19-20              |
| Conclusions                   | 26 | Provide a general interpretation of the results in the context of other evidence, and implications for future research.                                                                                  | 20                 |
| <b>FUNDING</b>                |    |                                                                                                                                                                                                          |                    |
| Funding                       | 27 | Describe sources of funding for the systematic review and other support (e.g., supply of data); role of funders for the systematic review.                                                               | 21                 |

From: Moher D, Liberati A, Tetzlaff J, Altman DG, The PRISMA Group (2009). Preferred Reporting Items for Systematic Reviews and Meta-Analyses: The PRISMA Statement. PLoS Med 6(7): e1000097. doi:10.1371/journal.pmed1000097

For more information, visit: [www.prisma-statement.org](http://www.prisma-statement.org).

**Appendix 2: Search strategies and results for The comparative efficacy and safety of alternative glucocorticoids regimens in patients with ANCA-associated vasculitis: A systematic review**

| Database         | No of records |
|------------------|---------------|
| MEDLINE          | 2842          |
| EMBASE           | 1233          |
| Cochrane Library | 377           |
| Subtotal         | 4452          |
| -duplicates      | -540          |
| Total            | 3912          |

Database: OVID MEDLINE

- 
- 1 Anti-Neutrophil Cytoplasmic Antibody-Associated Vasculitis/ (1682)
  - 2 Churg-Strauss Syndrome/ (2090)
  - 3 Microscopic Polyangiitis/ (507)
  - 4 Granulomatosis with Polyangiitis/ (6902)
  - 5 (vasculit\* adj3 (ANCA or AAV or antineutrophil or anti-neutrophil or cytoplasm\* or RLV or renal or churg or strauss or pauci immune)).mp. [mp=title, abstract, original title, name of substance word, subject heading word, floating sub-heading word, keyword heading word, organism supplementary concept word, protocol supplementary concept word, rare disease supplementary concept word, unique identifier, synonyms] (4968)
  - 6 churg strauss.mp. (2876)
  - 7 ((angiit\* or vasculit\*) adj3 (granulom\* or necrot\* or allergic)).mp. [mp=title, abstract, original title, name of substance word, subject heading word, floating sub-heading word, keyword heading word, organism supplementary concept word, protocol supplementary concept word, rare disease supplementary concept word, unique identifier, synonyms] (4297)
  - 8 ((polyangiit\* or polyarterit\*) adj3 (microscop\* or MPA or granulom\*)).mp. (9268)
  - 9 wegener\*.mp. (6572)
  - 10 (glomerulonephrit\* adj3 necrot\*).mp. [mp=title, abstract, original title, name of substance word, subject heading word, floating sub-heading word, keyword heading word, organism supplementary concept word, protocol supplementary concept word, rare disease supplementary concept word, unique identifier, synonyms] (797)
  - 11 or/1-10 (18126)
  - 12 exp Glucocorticoids/ (190619)
  - 13 prednisolone/ or methylprednisolone/ (49855)
  - 14 Prednisone/ (39084)
  - 15 Adrenal Cortex Hormones/ (63823)

1  
2  
3 16 (corticosteroid\* or glucocorticoid\* or methylprednisolon\* or prednison\* or  
4 prednisolon\*).mp. [mp=title, abstract, original title, name of substance word, subject  
5 heading word, floating sub-heading word, keyword heading word, organism  
6 supplementary concept word, protocol supplementary concept word, rare disease  
7 supplementary concept word, unique identifier, synonyms] (283874)  
8  
9 17 Corticosterone/ or corticosteron\*.mp. (34191)  
10 18 Hydrocortisone/ or hydrocortison\*.mp. (76765)  
11 19 Cortisone/ or cortison\*.mp. (23710)  
12 20 steroids.mp. or Steroids/ (112972)  
13 21 Cortodoxone/ or cortodoxon\*.mp. (856)  
14 22 Hydroxycorticosteroids/ or hydroxycorticosteroid\*.mp. (6731)  
15 23 Dexamethasone/ or dexamethason\*.mp. (71052)  
16 24 adrenocorticosteroid\*.mp. (313)  
17 25 adrenocorticoid\*.mp. (177)  
18 26 corticoid\*.mp. (6458)  
19 27 or/12-26 (547377)  
20 28 11 and 27 (4782)  
21 29 randomized controlled trial.pt. (503644)  
22 30 controlled clinical trial.pt. (93611)  
23 31 randomized.ab. (475606)  
24 32 placebo.ab. (206694)  
25 33 drug therapy.fs. (2193818)  
26 34 randomly.ab. (330775)  
27 35 trial.ab. (501000)  
28 36 groups.ab. (2031658)  
29 37 or/29-36 (4675601)  
30 38 exp animals/ not humans.sh. (4689197)  
31 39 37 not 38 (4053127)  
32 40 28 and 39 (2842)  
33  
34  
35  
36  
37  
38  
39  
40

Database: EMBASE

41  
42 1 ANCA associated vasculitis/ (5871)  
43 2 Churg Strauss syndrome/ (4947)  
44 3 microscopic polyangiitis/ (3039)  
45 4 Wegener granulomatosis/ (12860)  
46 5 (vasculit\* adj3 (ANCA or AAV or antineutrophil or anti-neutrophil or cytoplasm\*  
47 or RLV or renal or churg or strauss or pauci immune)).mp. [mp=title, abstract,  
48 heading word, drug trade name, original title, device manufacturer, drug  
49 manufacturer, device trade name, keyword, floating subheading word, candidate  
50 term word] (9651)  
51 6 churg strauss.mp. (5425)  
52 7 ((angiit\* or vasculit\*) adj3 (granulom\* or necrot\* or allergic)).mp. [mp=title,  
53 abstract, heading word, drug trade name, original title, device manufacturer, drug  
54  
55  
56  
57  
58  
59  
60

1  
 2  
 3 manufacturer, device trade name, keyword, floating subheading word, candidate  
 4 term word] (7160)  
 5 8 ((polyangiit\* or polyarterit\*) adj3 (microscop\* or MPA or granulom\*)).mp.  
 6 [mp=title, abstract, heading word, drug trade name, original title, device  
 7 manufacturer, drug manufacturer, device trade name, keyword, floating subheading  
 8 word, candidate term word] (7171)  
 9 9 wegener\*.mp. (14257)  
 10 10 (glomerulonephrit\* adj3 necrot\*).mp. [mp=title, abstract, heading word, drug  
 11 trade name, original title, device manufacturer, drug manufacturer, device trade  
 12 name, keyword, floating subheading word, candidate term word] (1243)  
 13 11 or/1-10 (29983)  
 14 12 exp glucocorticoid/ (700322)  
 15 13 prednisolone/ (122582)  
 16 14 methylprednisolone/ (93152)  
 17 15 prednisone/ (167298)  
 18 16 corticosteroid/ (229322)  
 19 17 (corticosteroid\* or glucocorticoid\* or methylprednisolon\* or prednison\* or  
 20 prednisolon\*).mp. [mp=title, abstract, heading word, drug trade name, original title,  
 21 device manufacturer, drug manufacturer, device trade name, keyword, floating  
 22 subheading word, candidate term word] (688798)  
 23 18 corticosterone/ or corticosteron\*.mp. (38497)  
 24 19 hydrocortisone/ or hydrocortison\*.mp. (135041)  
 25 20 cortisone/ or cortison\*.mp. (17205)  
 26 21 steroids.mp. or steroid/ (245681)  
 27 22 cortodoxone/ or cortodoxon\*.mp. (2044)  
 28 23 hydroxycorticosteroid\*.mp. or hydroxycorticosteroid/ (2310)  
 29 24 dexamethasone/ or dexamethason\*.mp. (161446)  
 30 25 adrenocorticosteroid\*.mp. (286)  
 31 26 adrenocorticoid\*.mp. (169)  
 32 27 corticoid\*.mp. (7745)  
 33 28 or/12-27 (1111323)  
 34 29 11 and 28 (13676)  
 35 30 randomized controlled trial/ (598366)  
 36 31 Controlled clinical study/ (463908)  
 37 32 random\$.ti,ab. (1520687)  
 38 33 randomization/ (86548)  
 39 34 intermethod comparison/ (258594)  
 40 35 placebo.ti,ab. (303776)  
 41 36 (compare or compared or comparison).ti. (505122)  
 42 37 ((evaluated or evaluate or evaluating or assessed or assess) and (compare or  
 43 compared or comparing or comparison)).ab. (2085158)  
 44 38 (open adj label).ti,ab. (78322)  
 45 39 ((double or single or doubly or singly) adj (blind or blinded or blindly)).ti,ab.  
 46 (230181)  
 47 40 double blind procedure/ (171296)  
 48 41 parallel group\$.ti,ab. (25234)

1  
 2  
 3 42 (crossover or cross over).ti,ab. (104111)  
 4 43 ((assign\$ or match or matched or allocation) adj5 (alternate or group\$1 or  
 5 intervention\$1 or patient\$1 or subject\$1 or participant\$1)).ti,ab. (326088)  
 6 44 (assigned or allocated).ti,ab. (383843)  
 7 45 (controlled adj7 (study or design or trial)).ti,ab. (343989)  
 8 46 (volunteer or volunteers).ti,ab. (244774)  
 9 47 human experiment/ (490852)  
 10 48 trial.ti. (296188)  
 11 49 or/30-48 (4957675)  
 12 50 29 and 49 (1233)  
 13  
 14  
 15  
 16  
 17  
 18

Database: Cochrane Library

---

19  
 20 ID Search Hits  
 21 #1 MeSH descriptor: [Anti-Neutrophil Cytoplasmic Antibody-Associated  
 22 Vasculitis] explode all trees 157  
 23 #2 MeSH descriptor: [Churg-Strauss Syndrome] explode all trees 27  
 24 #3 MeSH descriptor: [Microscopic Polyangiitis] explode all trees 40  
 25 #4 MeSH descriptor: [Granulomatosis with Polyangiitis] explode all trees 82  
 26 #5 vasculit\* near/3 (ANCA or AAV or antineutrophil or anti-neutrophil or  
 27 cytoplasm\* or RLV or renal or churg or strauss or pauci immune) 470  
 28 #6 churg strauss 112  
 29 #7 ((angiit\* or vasculit\*) near/3 (granulom\* or necrot\* or allergic)) 102  
 30 #8 ((polyangiit\* or polyarterit\*) near/3 (microscop\* or MPA or granulom\*))  
 31 277  
 32 #9 wegener\* 394  
 33 #10 (glomerulonephrit\* near/3 necrot\*) 13  
 34 #11 #1 or #2 or #3 or #4 or #5 or #6 or #7 or #8 or #9 or #10 867  
 35 #12 MeSH descriptor: [Glucocorticoids] explode all trees 4445  
 36 #13 MeSH descriptor: [Prednisolone] explode all trees 4804  
 37 #14 MeSH descriptor: [Methylprednisolone] explode all trees 2679  
 38 #15 MeSH descriptor: [Prednisone] explode all trees 3909  
 39 #16 MeSH descriptor: [Adrenal Cortex Hormones] explode all trees 14135  
 40 #17 corticosteroid\* or glucocorticoid\* or methylprednisolon\* or prednison\* or  
 41 prednisolon\* 41757  
 42 #18 MeSH descriptor: [Corticosterone] explode all trees 38  
 43 #19 MeSH descriptor: [Hydrocortisone] explode all trees 5886  
 44 #20 MeSH descriptor: [Cortisone] explode all trees 143  
 45 #21 MeSH descriptor: [Steroids] explode all trees 57500  
 46 #22 MeSH descriptor: [Cortodoxone] explode all trees 30  
 47 #23 MeSH descriptor: [Cortodoxone] explode all trees 30  
 48 #24 MeSH descriptor: [Hydroxycorticosteroids] explode all trees 7002  
 49 #25 MeSH descriptor: [Dexamethasone] explode all trees 4409  
 50  
 51  
 52  
 53  
 54  
 55  
 56  
 57  
 58  
 59  
 60



1  
2  
3 #26 corticosteron\* or hydrocortison or cortison\* or steroids or cortodoxon\* or  
4 hydroxycorticosteroid\* or dexamethason\* or adrenocorticosteroid\* or  
5 adrenocorticoid\* or corticoid\* 22688  
6  
7 #27 #12 or #13 or #14 or #15 or #16 or #17 or #18 or #19 or #20 or #21 or #22  
8 or #23 or #24 or #25 or #26 95898  
9 #28 #11 and #27 in Trials 377  
10  
11  
12  
13  
14  
15  
16  
17  
18  
19  
20  
21  
22  
23  
24  
25  
26  
27  
28  
29  
30  
31  
32  
33  
34  
35  
36  
37  
38  
39  
40  
41  
42  
43  
44  
45  
46  
47  
48  
49  
50  
51  
52  
53  
54  
55  
56  
57  
58  
59  
60

1  
2  
3  
4 **Appendix 3 Risk of Bias assessment for outcomes of included RCTs**

| 5 <b>Outcomes of Trials</b>  | <b>Sequence</b>   | <b>Allocation</b>  | <b>Blinding</b>   | <b>Blinding</b>     | <b>Blinding</b>   | <b>Blinding</b>    | <b>Blinding</b> | <b>Loss to</b>   |
|------------------------------|-------------------|--------------------|-------------------|---------------------|-------------------|--------------------|-----------------|------------------|
| 6                            | <b>generation</b> | <b>concealment</b> | <b>(patients)</b> | <b>(health care</b> | <b>(outcome</b>   | <b>(data</b>       | <b>(data</b>    | <b>follow-up</b> |
| 7                            |                   |                    |                   | <b>providers)</b>   | <b>assessors)</b> | <b>collectors)</b> | <b>analyst)</b> |                  |
| 8                            |                   |                    |                   |                     |                   |                    |                 |                  |
| 9 <b>Walsh et al. 2020</b>   |                   |                    |                   |                     |                   |                    |                 |                  |
| 10 Death                     | Definitely        | Definitely         | Probably          | Probably            | Probably          | Probably           | Probably        | Definitely       |
| 11                           | Low               | Low                | Low               | Low                 | Low               | Low                | Low             | Low              |
| 12 ESKD                      | Definitely        | Definitely         | Probably          | Probably            | Probably          | Probably           | Probably        | Definitely       |
| 13                           | Low               | Low                | Low               | Low                 | Low               | Low                | Low             | Low              |
| 14 Remission                 | Definitely        | Definitely         | Probably          | Probably            | Probably          | Probably           | Probably        | Definitely       |
| 15                           | Low               | Low                | Low               | Low                 | Low               | Low                | Low             | Low              |
| 16 Serious adverse           | Definitely        | Definitely         | Probably          | Probably            | Probably          | Probably           | Probably        | Definitely       |
| 17 events                    | Low               | Low                | Low               | Low                 | Low               | Low                | Low             | Low              |
| 18 Serious infections        | Definitely        | Definitely         | Probably          | Probably            | Probably          | Probably           | Probably        | Definitely       |
| 19                           | Low               | Low                | Low               | Low                 | Low               | Low                | Low             | Low              |
| 20 Health-related quality    | Definitely        | Definitely         | Probably          | Probably            | Probably          | Probably           | Probably        | Definitely       |
| 21 of life                   | Low               | Low                | Low               | Low                 | Low               | Low                | Low             | Low              |
| 22                           |                   |                    |                   |                     |                   |                    |                 |                  |
| 23 <b>Furuta et al. 2021</b> |                   |                    |                   |                     |                   |                    |                 |                  |
| 24 Death                     | Definitely        | Definitely         | Probably          | Probably            | Probably          | Probably           | Probably        | Definitely       |
| 25                           | Low               | Low                | Low               | Low                 | Low               | Low                | Low             | Low              |
| 26 ESKD                      | Definitely        | Definitely         | Probably          | Probably            | Probably          | Probably           | Probably        | Definitely       |
| 27                           | Low               | Low                | Low               | Low                 | Low               | Low                | Low             | Low              |
| 28 Remission                 | Definitely        | Definitely         | Probably          | Probably            | Probably          | Probably           | Probably        | Definitely       |
| 29                           | Low               | Low                | Low               | Low                 | Low               | Low                | Low             | Low              |
| 30 Relapse                   | Definitely        | Definitely         | Probably          | Probably            | Probably          | Probably           | Probably        | Definitely       |
| 31                           | Low               | Low                | Low               | Low                 | Low               | Low                | Low             | Low              |
| 32 Serious adverse           | Definitely        | Definitely         | Probably          | Probably            | Probably          | Probably           | Probably        | Definitely       |
| 33 events                    | Low               | Low                | Low               | Low                 | Low               | Low                | Low             | Low              |
| 34 Serious infections        | Definitely        | Definitely         | Probably          | Probably            | Probably          | Probably           | Probably        | Definitely       |
| 35                           | Low               | Low                | Low               | Low                 | Low               | Low                | Low             | Low              |
| 36 Health-related quality    | Definitely        | Definitely         | Probably          | Probably            | Probably          | Probably           | Probably        | Definitely       |
| 37 of life                   | Low               | Low                | Low               | Low                 | Low               | Low                | Low             | Low              |

49 ESKD: end-stage kidney disease; RCT: randomized controlled trial.

50  
51  
52  
53  
54  
55  
56  
57  
58  
59  
60

**Appendix 4 GRADE summary of findings on the use of reduced-dose regimen versus standard-dose regimen of glucocorticoids in patients with ANCA-associated vasculitis**

| Outcome<br>Timeframe     | Study results and measurements                                                 | Absolute effect estimates<br>Standard-dose regimen of glucocorticoids    Reduced-dose regimen of glucocorticoids                                                                                                                                                                                                                                                                                                                                                                                                                         | Certainty of the Evidence<br>(Quality of evidence)         | Plain text summary                                                                                                                 |
|--------------------------|--------------------------------------------------------------------------------|------------------------------------------------------------------------------------------------------------------------------------------------------------------------------------------------------------------------------------------------------------------------------------------------------------------------------------------------------------------------------------------------------------------------------------------------------------------------------------------------------------------------------------------|------------------------------------------------------------|------------------------------------------------------------------------------------------------------------------------------------|
| Death                    | Based on data from 838 patients in 2 study<br>Follow up: 6 months to 2.9 years | Two RCTs reported death from any cause. In Walsh et al's trial, death occurred in 46 of 353 patients (13.0%) in the reduced-dose GC therapy group and in 53 of 351 patients (15.1%) in the standard-dose GC therapy group (Risk difference, -2.1%; 95% confidence interval, -6% to 3.6%). In Furuta et al's trial, death occurred in 2 of 69 patients (2.9%) in the reduced-dose GC treatment group and in 3 of 65 patients (4.6%) in the high-dose GC treatment group (Risk difference, -1.7%; 95% confidence interval, -4.7% to 8.2%). | <b>Low</b><br>Due to very serious imprecision <sup>1</sup> | Reduced dose of glucocorticoids may reduce death at follow-up of 6 months to 2.9 years                                             |
| End-stage kidney disease | Based on data from 838 patients in 2 study<br>Follow up: 6 months to 2.9 years | Two RCTs reported end-stage kidney disease. In Walsh et al's trial, end-stage kidney disease occurred in 70 of 353 patients (19.8%) in the reduced-dose GC therapy group and in 68 of 351 patients (19.4%) in the standard-dose GC therapy group (Risk difference, 0.4%; 95% confidence interval, -4.7%                                                                                                                                                                                                                                  | <b>Moderate</b><br>Due to serious imprecision <sup>2</sup> | Reduced dose of glucocorticoids probably has little or no effect on end-stage kidney disease at follow-up of 6 months to 2.9 years |

|           |                                                                                |                                                                                                                                                                                                                                                                                                                                                                                                                                                                                             |                                                            |                                                                                                                               |
|-----------|--------------------------------------------------------------------------------|---------------------------------------------------------------------------------------------------------------------------------------------------------------------------------------------------------------------------------------------------------------------------------------------------------------------------------------------------------------------------------------------------------------------------------------------------------------------------------------------|------------------------------------------------------------|-------------------------------------------------------------------------------------------------------------------------------|
|           |                                                                                | to 7.4%). In Furuta et al's trial, end-stage kidney disease occurred in none of 69 patients (0%) in the reduced-dose GC treatment group and in 1 of 65 patients (1.5%) in the high-dose GC treatment group (Risk difference, -1.5; 95% confidence interval, -4.5 to 1.5).                                                                                                                                                                                                                   |                                                            |                                                                                                                               |
| Remission | Based on data from 838 patients in 2 study<br>Follow up: 6 months to 2.9 years | Two RCTs reported remission rate. In Walsh et al's trial, remission was analyzed in the two GC groups with the use of Cox proportional-hazards models resulting a hazard ratio of 1.04 (95% confidence interval, 0.81 to 1.33). In Furuta et al's trial, remission occurred in 49 of 69 patients (71.0%) in the reduced-dose GC treatment group and in 45 of 65 patients (69.2%) in the high-dose GC treatment group (Risk difference, 1.8%; 97.5% confidence interval, -13% to $\infty$ ). | <b>Moderate</b><br>Due to serious imprecision <sup>1</sup> | Reduced dose of glucocorticoids probably has little or no effect on disease remission at follow-up of 6 months to 2.9 years   |
| Relapse   | Based on data from 838 patients in 2 study<br>Follow up: 6 months to 2.9 years | Two RCTs reported remission rate. In Walsh et al's trial, relapse occurred in 32 of 353 patients (9.1%) in the reduced-dose GC therapy group and in 23 of 351 patients (6.6%) in the standard-dose GC therapy group (Risk difference, 2.5%; 95% confidence interval, -1.45% to 6.47%). In Furuta et al's trial, relapse occurred in 3                                                                                                                                                       | <b>Moderate</b><br>Due to serious imprecision <sup>3</sup> | Reduced dose of glucocorticoids probably has little or no effect on relapse in patients at follow-up of 6 months to 2.9 years |

|                                                                                                                                                                            |                                                                                                                      |                                                                                                                                                                                                                                                                                                                                                                                                                                                                                                                                                                                                |                                                                                                               |                                                                                                                                              |
|----------------------------------------------------------------------------------------------------------------------------------------------------------------------------|----------------------------------------------------------------------------------------------------------------------|------------------------------------------------------------------------------------------------------------------------------------------------------------------------------------------------------------------------------------------------------------------------------------------------------------------------------------------------------------------------------------------------------------------------------------------------------------------------------------------------------------------------------------------------------------------------------------------------|---------------------------------------------------------------------------------------------------------------|----------------------------------------------------------------------------------------------------------------------------------------------|
|                                                                                                                                                                            |                                                                                                                      | of 69 patients (4.3%) in the reduced-dose GC treatment group and in none of 65 patients (0%) in the high-dose GC treatment group (Risk difference, 4.4%; 95% confidence interval, -0.5% to 9.2%).                                                                                                                                                                                                                                                                                                                                                                                              |                                                                                                               |                                                                                                                                              |
| 19<br>20<br>21<br>22<br>23<br>24<br>25<br>26<br>27<br>28<br>29<br>30<br>31<br>32<br>33<br>34<br>35<br>36<br>37<br>38<br>39<br>40<br>41<br>42<br>43<br>44<br>45<br>46<br>47 | <p>Serious adverse events</p> <p>Based on data from 838 patients in 2 study</p> <p>Follow up: 6 months to 1 year</p> | <p>Two RCTs reported serious adverse events. In Walsh et al's trial, serious adverse events occurred in 230 of 353 patients (65.2%) in the reduced-dose GC therapy group and in 218 of 351 patients (62.1%) in the standard-dose GC therapy group (Risk difference, 3.1%; 95% confidence interval, -3.7% to 11.2%). In Furuta et al's trial, serious adverse events occurred in 13 of 69 patients (18.8%) in the reduced-dose GC treatment group and in 24 of 65 patients (36.9%) in the high-dose GC treatment group (Risk difference, -18.1%; 95% confidence interval, -33.0% to -3.2%).</p> | <p><b>Very Low</b></p> <p>Due to serious imprecision<sup>4</sup></p> <p>Due to very serious inconsistency</p> | <p>We are uncertain whether reduced dose of glucocorticoids increases or reduce the risk of serious adverse events at 6 months to 1 year</p> |
| 48<br>49<br>50<br>51<br>52<br>53<br>54<br>55<br>56<br>57<br>58<br>59<br>60                                                                                                 | <p>Serious infections</p> <p>Based on data from 838 patients in 2 study</p> <p>Follow up: 6 months to 1 year</p>     | <p>Two RCTs reported serious infections. In Walsh et al's trial, serious infections occurred in 230 of 353 patients (27.1%) in the reduced-dose GC therapy group and in 218 of 351 patients (33.0%) in the standard-dose GC therapy group (Risk difference, -5.9%;</p>                                                                                                                                                                                                                                                                                                                         | <p><b>Moderate</b></p> <p>Due to serious imprecision<sup>3</sup></p>                                          | <p>Reduced dose of glucocorticoids probably reduces the risk of serious infections at 6 months to 1 year</p>                                 |

|                                                   |                                                                                                                                                   |                                                                                                                                                                                                                                                                                                                                                                                                                                                                                                                                                                                                                                                                                                               |                                                          |                                                                                                                                             |
|---------------------------------------------------|---------------------------------------------------------------------------------------------------------------------------------------------------|---------------------------------------------------------------------------------------------------------------------------------------------------------------------------------------------------------------------------------------------------------------------------------------------------------------------------------------------------------------------------------------------------------------------------------------------------------------------------------------------------------------------------------------------------------------------------------------------------------------------------------------------------------------------------------------------------------------|----------------------------------------------------------|---------------------------------------------------------------------------------------------------------------------------------------------|
|                                                   |                                                                                                                                                   | <p>95% confidence interval, -11.2% to 1.0%). In Furuta et al's trial, serious infections occurred in 5 of 69 patients (7.2%) in the reduced-dose GC treatment group and in 13 of 65 patients (20.0%) in the high-dose GC treatment group (Risk difference, -12.8%; 95% confidence interval, -24.2% to -1.3%).</p>                                                                                                                                                                                                                                                                                                                                                                                             |                                                          |                                                                                                                                             |
| <p>Health related quality of life (SF-36 PCS)</p> | <p>Measured by: SF-36 PCS</p> <p>Scale: - High better</p> <p>Based on data from 838 patients in 2 study</p> <p>Follow up: 6 months to 1 years</p> | <p>Two RCTs reported health related quality of life assessed by SF-36 PCS. Walsh et al's trial reported that the mean score of health related quality of life measured by SF-36PCS was 39.13 in the reduced-dose GC therapy group and 37.84 in the standard-dose GC therapy group (Mean difference, 1.29 higher; 95% confidence interval, 0.26 lower to 2.84 higher). Furuta et al's trial reported that the median score of health related quality of life measured by SF-36PCS was 38.3 (IQR : 21.1 to 47.4) in the reduced-dose GC treatment group and 31.7 (IQR : 22.0 to 49.4) in the high-dose GC treatment group (Mean difference, 6.3 higher; 95% confidence interval, 2.6 lower to 15.2 higher).</p> | <p><b>Moderate</b></p> <p>Due to serious imprecision</p> | <p>Reduced dose of glucocorticoids probably has little or no effect on health related quality of life (SF-36PCS) at 6 months to 1 years</p> |

|                                                                     |                                                                                                                                          |                                                                                                                                                                                                                                                                                                                                                                                                                                                                                                                                                                                                                                                                                                                 |                                                                   |                                                                                                                                    |
|---------------------------------------------------------------------|------------------------------------------------------------------------------------------------------------------------------------------|-----------------------------------------------------------------------------------------------------------------------------------------------------------------------------------------------------------------------------------------------------------------------------------------------------------------------------------------------------------------------------------------------------------------------------------------------------------------------------------------------------------------------------------------------------------------------------------------------------------------------------------------------------------------------------------------------------------------|-------------------------------------------------------------------|------------------------------------------------------------------------------------------------------------------------------------|
| <p>Health related quality of life (SF-36 MCS)</p>                   | <p>Measured by: SF-36 MCS<br/>Scale: - High better<br/>Based on data from 838 patients in 2 study<br/>Follow up: 6 months to 1 years</p> | <p>Two RCTs reported health related quality of life assessed by SF-36 MCS. Walsh et al's trial reported that the mean score of health related quality of life measured by SF-36MCS was 52.16 in the reduced-dose GC therapy group and 51.19 in the standard-dose GC therapy group (Mean difference, 0.97 higher; 95% confidence interval, 0.24 lower to 2.18 higher).<br/>Furuta et al's trial reported that the median score of health related quality of life measured by SF-36MCS was 49.8 (IQR : 45.1 to 56.6) in the reduced-dose GC treatment group and 50.4 (IQR : 46.3 to 57.2) in the high-dose GC treatment group (Mean difference, 0.4 lower; 95% confidence interval, 4.7 lower to 4.0 higher).</p> | <p><b>High</b></p>                                                | <p>Reduced dose of glucocorticoids has little or no effect on health related quality of life (SF-36MCS) at 6 months to 1 years</p> |
| <p>Health related quality of life (EQ-5D Index) at 1 year</p>       | <p>Measured by: EQ-5D Index<br/>Scale: - High better<br/>Based on data from 704 patients in 1 study<br/>Follow up at 1 year</p>          | <p><b>0.77</b>      <b>0.79</b><br/>Mean            Mean<br/>Difference: <b>MD 0.02 higher</b><br/>(CI 95% 0.01 lower - 0.05 higher)</p>                                                                                                                                                                                                                                                                                                                                                                                                                                                                                                                                                                        | <p><b>Moderate</b><br/>Due to serious imprecision<sup>5</sup></p> | <p>Reduced dose of glucocorticoids probably has little or no effect on health related quality of life (EQ-5D) at 1 year</p>        |
| <p>Health related quality of life (EQ-5D Thermometer) at 1 year</p> | <p>Measured by: EQ-5D Thermometer<br/>Scale: - High better<br/>Based on data from 704 patients in 1 study<br/>Follow up at 1 year</p>    | <p><b>71.07</b>      <b>72.11</b><br/>Mean            Mean<br/>Difference: <b>MD 1.04 higher</b><br/>(CI 95% 1.09 lower - 3.17 higher)</p>                                                                                                                                                                                                                                                                                                                                                                                                                                                                                                                                                                      | <p><b>High</b></p>                                                | <p>Reduced dose of glucocorticoids has little or no effect on health related quality of life (EQ-5D Thermometer) at 1 year</p>     |

1  
2  
3  
4  
5  
6       **1. Imprecision: Very serious.** Because the 95% CI includes both the minimally important difference for  
7 benefit (20 fewer death in 1000 patients) and minimally important difference for harm (20 more death in 1000  
8 patients, we rated down two levels for imprecision;  
9

10       **2. Imprecision: Serious.** The 95% CI crosses the minimally important difference for benefit (30 fewer ESKD  
11 in 1000 patients) and minimally important difference for harm (30 more ESKD in 1000 patients) ;  
12  
13

14       **3. Imprecision: Serious.** The 95% CI crosses the minimally important difference (50 fewer serious  
15 infections in 1000 patients);  
16

17       **4. Imprecision: Serious.** The 95% CI includes an increase in serious adverse event over 10%;  
18  
19

20       **5. Imprecision: Serious.** The 95% CI crosses the minimally important difference for benefit and the  
21 minimally important difference for harm (0.03 reduction or increase in EQ-5D Index) ;  
22

23 ESKD: end-stage kidney disease; SF-36 = short form 36; PCS = physical component score; MCS = mental  
24 component score; EQ = EuroQol; RR: relative risk; MD: mean difference; CI: confidence interval. IQR = interquartile  
25 range  
26  
27  
28  
29  
30  
31  
32  
33  
34  
35  
36  
37  
38  
39  
40  
41  
42  
43  
44  
45  
46  
47  
48  
49  
50  
51  
52  
53  
54  
55  
56  
57  
58  
59  
60





# PRISMA 2009 Checklist

| Section/topic                      | #  | Checklist item                                                                                                                                                                                                                                                                                              | Reported on page # |
|------------------------------------|----|-------------------------------------------------------------------------------------------------------------------------------------------------------------------------------------------------------------------------------------------------------------------------------------------------------------|--------------------|
| <b>TITLE</b>                       |    |                                                                                                                                                                                                                                                                                                             |                    |
| Title                              | 1  | Identify the report as a systematic review, meta-analysis, or both.                                                                                                                                                                                                                                         | 1-2                |
| <b>ABSTRACT</b>                    |    |                                                                                                                                                                                                                                                                                                             |                    |
| Structured summary                 | 2  | Provide a structured summary including, as applicable: background; objectives; data sources; study eligibility criteria, participants, and interventions; study appraisal and synthesis methods; results; limitations; conclusions and implications of key findings; systematic review registration number. | 3-4                |
| <b>INTRODUCTION</b>                |    |                                                                                                                                                                                                                                                                                                             |                    |
| Rationale                          | 3  | Describe the rationale for the review in the context of what is already known.                                                                                                                                                                                                                              | 5-6                |
| Objectives                         | 4  | Provide an explicit statement of questions being addressed with reference to participants, interventions, comparisons, outcomes, and study design (PICOS).                                                                                                                                                  | 6                  |
| <b>METHODS</b>                     |    |                                                                                                                                                                                                                                                                                                             |                    |
| Protocol and registration          | 5  | Indicate if a review protocol exists, if and where it can be accessed (e.g., Web address), and, if available, provide registration information including registration number.                                                                                                                               | 6                  |
| Eligibility criteria               | 6  | Specify study characteristics (e.g., PICOS, length of follow-up) and report characteristics (e.g., years considered, language, publication status) used as criteria for eligibility, giving rationale.                                                                                                      | 7                  |
| Information sources                | 7  | Describe all information sources (e.g., databases with dates of coverage, contact with study authors to identify additional studies) in the search and date last searched.                                                                                                                                  | 7                  |
| Search                             | 8  | Present full electronic search strategy for at least one database, including any limits used, such that it could be repeated.                                                                                                                                                                               | 7                  |
| Study selection                    | 9  | State the process for selecting studies (i.e., screening, eligibility, included in systematic review, and, if applicable, included in the meta-analysis).                                                                                                                                                   | 8                  |
| Data collection process            | 10 | Describe method of data extraction from reports (e.g., piloted forms, independently, in duplicate) and any processes for obtaining and confirming data from investigators.                                                                                                                                  | 7-8                |
| Data items                         | 11 | List and define all variables for which data were sought (e.g., PICOS, funding sources) and any assumptions and simplifications made.                                                                                                                                                                       | 7-8                |
| Risk of bias in individual studies | 12 | Describe methods used for assessing risk of bias of individual studies (including specification of whether this was done at the study or outcome level), and how this information is to be used in any data synthesis.                                                                                      | 8                  |
| Summary measures                   | 13 | State the principal summary measures (e.g., risk ratio, difference in means).                                                                                                                                                                                                                               | 8                  |
| Synthesis of results               | 14 | Describe the methods of handling data and combining results of studies, if done, including measures of consistency (e.g., $I^2$ ) for each meta-analysis.                                                                                                                                                   | 8                  |



# PRISMA 2009 Checklist

| Section/topic                 | #  | Checklist item                                                                                                                                                                                           | Reported on page # |
|-------------------------------|----|----------------------------------------------------------------------------------------------------------------------------------------------------------------------------------------------------------|--------------------|
| Risk of bias across studies   | 15 | Specify any assessment of risk of bias that may affect the cumulative evidence (e.g., publication bias, selective reporting within studies).                                                             | 8                  |
| Additional analyses           | 16 | Describe methods of additional analyses (e.g., sensitivity or subgroup analyses, meta-regression), if done, indicating which were pre-specified.                                                         | 8                  |
| <b>RESULTS</b>                |    |                                                                                                                                                                                                          |                    |
| Study selection               | 17 | Give numbers of studies screened, assessed for eligibility, and included in the review, with reasons for exclusions at each stage, ideally with a flow diagram.                                          | 9                  |
| Study characteristics         | 18 | For each study, present characteristics for which data were extracted (e.g., study size, PICOS, follow-up period) and provide the citations.                                                             | 9-12               |
| Risk of bias within studies   | 19 | Present data on risk of bias of each study and, if available, any outcome level assessment (see item 12).                                                                                                | 13                 |
| Results of individual studies | 20 | For all outcomes considered (benefits or harms), present, for each study: (a) simple summary data for each intervention group (b) effect estimates and confidence intervals, ideally with a forest plot. | 9-12               |
| Synthesis of results          | 21 | Present results of each meta-analysis done, including confidence intervals and measures of consistency.                                                                                                  | 13-17              |
| Risk of bias across studies   | 22 | Present results of any assessment of risk of bias across studies (see Item 15).                                                                                                                          | 13-17              |
| Additional analysis           | 23 | Give results of additional analyses, if done (e.g., sensitivity or subgroup analyses, meta-regression [see Item 16]).                                                                                    | 13-17              |
| <b>DISCUSSION</b>             |    |                                                                                                                                                                                                          |                    |
| Summary of evidence           | 24 | Summarize the main findings including the strength of evidence for each main outcome; consider their relevance to key groups (e.g., healthcare providers, users, and policy makers).                     | 18-19              |
| Limitations                   | 25 | Discuss limitations at study and outcome level (e.g., risk of bias), and at review-level (e.g., incomplete retrieval of identified research, reporting bias).                                            | 19-20              |
| Conclusions                   | 26 | Provide a general interpretation of the results in the context of other evidence, and implications for future research.                                                                                  | 20                 |
| <b>FUNDING</b>                |    |                                                                                                                                                                                                          |                    |
| Funding                       | 27 | Describe sources of funding for the systematic review and other support (e.g., supply of data); role of funders for the systematic review.                                                               | 21                 |

From: Moher D, Liberati A, Tetzlaff J, Altman DG, The PRISMA Group (2009). Preferred Reporting Items for Systematic Reviews and Meta-Analyses: The PRISMA Statement. PLoS Med 6(7): e1000097. doi:10.1371/journal.pmed1000097

For more information, visit: [www.prisma-statement.org](http://www.prisma-statement.org).
