# Supplementary material for: Comparative efficacy and safety of alternative glucocorticoids regimens in patients with ANCA-associated vasculitis: a systematic review
Source: PubMed Central journal article supplement — BMJ Open. 2022 Feb 25;12(2):e050507. doi: 10.1136/bmjopen-2021-050507 (PMC8883216; doi:10.1136/bmjopen-2021-050507), 2022-02-25
Supplement: bmjopen-2021-050507supp002.pdf [file bmjopen-2021-050507supp002.pdf]

## Appendix 2: Search strategies and results for The comparative efficacy and safety of alternative glucocorticoids regimens in patients with ANCA-associated vasculitis: A systematic review

| Database         | No of records |
|------------------|---------------|
| MEDLINE          | 2842          |
| EMBASE           | 1233          |
| Cochrane Library | 377           |
| Subtotal         | 4452          |
| -dupes           | -540          |
| Total            | 3912          |

Database: OVID MEDLINE

- 
- 1 Anti-Neutrophil Cytoplasmic Antibody-Associated Vasculitis/ (1682)
  - 2 Churg-Strauss Syndrome/ (2090)
  - 3 Microscopic Polyangiitis/ (507)
  - 4 Granulomatosis with Polyangiitis/ (6902)
  - 5 (vasculit\* adj3 (ANCA or AAV or antineutrophil or anti-neutrophil or cytoplasm\* or RLV or renal or churg or strauss or pauci immune)).mp. [mp=title, abstract, original title, name of substance word, subject heading word, floating sub-heading word, keyword heading word, organism supplementary concept word, protocol supplementary concept word, rare disease supplementary concept word, unique identifier, synonyms] (4968)
  - 6 churg strauss.mp. (2876)
  - 7 ((angit\* or vasculit\*) adj3 (granulom\* or necrot\* or allergic)).mp. [mp=title, abstract, original title, name of substance word, subject heading word, floating sub-heading word, keyword heading word, organism supplementary concept word, protocol supplementary concept word, rare disease supplementary concept word, unique identifier, synonyms] (4297)
  - 8 ((polyangiit\* or polyarterit\*) adj3 (microscop\* or MPA or granulom\*)).mp. (9268)
  - 9 wegner\*.mp. (6572)
  - 10 (glomerulonephrit\* adj3 necrot\*).mp. [mp=title, abstract, original title, name of substance word, subject heading word, floating sub-heading word, keyword heading word, organism supplementary concept word, protocol supplementary concept word, rare disease supplementary concept word, unique identifier, synonyms] (797)
  - 11 or/1-10 (18126)
  - 12 exp Glucocorticoids/ (190619)
  - 13 prednisolone/ or methylprednisolone/ (49855)
  - 14 Prednisone/ (39084)
  - 15 Adrenal Cortex Hormones/ (63823)

- 16 (corticosteroid\* or glucocorticoid\* or methylprednisolon\* or prednison\* or prednisolon\*).mp. [mp=title, abstract, original title, name of substance word, subject heading word, floating sub-heading word, keyword heading word, organism supplementary concept word, protocol supplementary concept word, rare disease supplementary concept word, unique identifier, synonyms] (283874)
- 17 Corticosterone/ or corticosteron\*.mp. (34191)
- 18 Hydrocortisone/ or hydrocortison\*.mp. (76765)
- 19 Cortisone/ or cortison\*.mp. (23710)
- 20 steroids.mp. or Steroids/ (112972)
- 21 Cortodoxone/ or cortodoxon\*.mp. (856)
- 22 Hydroxycorticosteroids/ or hydroxycorticosteroid\*.mp. (6731)
- 23 Dexamethasone/ or dexamethason\*.mp. (71052)
- 24 adrenocorticosteroid\*.mp. (313)
- 25 adrenocorticoid\*.mp. (177)
- 26 corticoid\*.mp. (6458)
- 27 or/12-26 (547377)
- 28 11 and 27 (4782)
- 29 randomized controlled trial.pt. (503644)
- 30 controlled clinical trial.pt. (93611)
- 31 randomized.ab. (475606)
- 32 placebo.ab. (206694)
- 33 drug therapy.fs. (2193818)
- 34 randomly.ab. (330775)
- 35 trial.ab. (501000)
- 36 groups.ab. (2031658)
- 37 or/29-36 (4675601)
- 38 exp animals/ not humans.sh. (4689197)
- 39 37 not 38 (4053127)
- 40 28 and 39 (2842)

Database: EMBASE

-----

- 1 ANCA associated vasculitis/ (5871)
- 2 Churg Strauss syndrome/ (4947)
- 3 microscopic polyangiitis/ (3039)
- 4 Wegener granulomatosis/ (12860)
- 5 (vasculit\* adj3 (ANCA or AAV or antineutrophil or anti-neutrophil or cytoplasm\* or RLV or renal or churg or strauss or pauci immune)).mp. [mp=title, abstract, heading word, drug trade name, original title, device manufacturer, drug manufacturer, device trade name, keyword, floating subheading word, candidate term word] (9651)
- 6 churg strauss.mp. (5425)
- 7 ((angiit\* or vasculit\*) adj3 (granulom\* or necrot\* or allergic)).mp. [mp=title, abstract, heading word, drug trade name, original title, device manufacturer, drug

- manufacturer, device trade name, keyword, floating subheading word, candidate term word] (7160)
- 8 ((polyangiit\* or polyarterit\*) adj3 (microscop\* or MPA or granulom\*)).mp. [mp=title, abstract, heading word, drug trade name, original title, device manufacturer, drug manufacturer, device trade name, keyword, floating subheading word, candidate term word] (7171)
- 9 wegener\*.mp. (14257)
- 10 (glomerulonephrit\* adj3 necrot\*).mp. [mp=title, abstract, heading word, drug trade name, original title, device manufacturer, drug manufacturer, device trade name, keyword, floating subheading word, candidate term word] (1243)
- 11 or/1-10 (29983)
- 12 exp glucocorticoid/ (700322)
- 13 prednisolone/ (122582)
- 14 methylprednisolone/ (93152)
- 15 prednisone/ (167298)
- 16 corticosteroid/ (229322)
- 17 (corticosteroid\* or glucocorticoid\* or methylprednisolon\* or prednison\* or prednisolon\*).mp. [mp=title, abstract, heading word, drug trade name, original title, device manufacturer, drug manufacturer, device trade name, keyword, floating subheading word, candidate term word] (688798)
- 18 corticosterone/ or corticosteron\*.mp. (38497)
- 19 hydrocortisone/ or hydrocortison\*.mp. (135041)
- 20 cortisone/ or cortison\*.mp. (17205)
- 21 steroids.mp. or steroid/ (245681)
- 22 cortodoxone/ or cortodoxon\*.mp. (2044)
- 23 hydroxycorticosteroid\*.mp. or hydroxycorticosteroid/ (2310)
- 24 dexamethasone/ or dexamethason\*.mp. (161446)
- 25 adrenocorticosteroid\*.mp. (286)
- 26 adrenocorticoid\*.mp. (169)
- 27 corticoid\*.mp. (7745)
- 28 or/12-27 (1111323)
- 29 11 and 28 (13676)
- 30 randomized controlled trial/ (598366)
- 31 Controlled clinical study/ (463908)
- 32 random\$.ti,ab. (1520687)
- 33 randomization/ (86548)
- 34 intermethod comparison/ (258594)
- 35 placebo.ti,ab. (303776)
- 36 (compare or compared or comparison).ti. (505122)
- 37 ((evaluated or evaluate or evaluating or assessed or assess) and (compare or compared or comparing or comparison)).ab. (2085158)
- 38 (open adj label).ti,ab. (78322)
- 39 ((double or single or doubly or singly) adj (blind or blinded or blindly)).ti,ab. (230181)
- 40 double blind procedure/ (171296)
- 41 parallel group\$1.ti,ab. (25234)

- 42 (crossover or cross over).ti,ab. (104111)  
 43 ((assign\$ or match or matched or allocation) adj5 (alternate or group\$1 or intervention\$1 or patient\$1 or subject\$1 or participant\$1)).ti,ab. (326088)  
 44 (assigned or allocated).ti,ab. (383843)  
 45 (controlled adj7 (study or design or trial)).ti,ab. (343989)  
 46 (volunteer or volunteers).ti,ab. (244774)  
 47 human experiment/ (490852)  
 48 trial.ti. (296188)  
 49 or/30-48 (4957675)  
 50 29 and 49 (1233)

Database: Cochrane Library

| ID  | Search Hits                                                                                                                               |
|-----|-------------------------------------------------------------------------------------------------------------------------------------------|
| #1  | MeSH descriptor: [Anti-Neutrophil Cytoplasmic Antibody-Associated Vasculitis] explode all trees 157                                       |
| #2  | MeSH descriptor: [Churg-Strauss Syndrome] explode all trees 27                                                                            |
| #3  | MeSH descriptor: [Microscopic Polyangiitis] explode all trees 40                                                                          |
| #4  | MeSH descriptor: [Granulomatosis with Polyangiitis] explode all trees 82                                                                  |
| #5  | vasculit* near/3 (ANCA or AAV or antineutrophil or anti-neutrophil or cytoplasm* or RLV or renal or churg or strauss or pauci immune) 470 |
| #6  | churg strauss 112                                                                                                                         |
| #7  | ((angiit* or vasculit*) near/3 (granulom* or necrot* or allergic)) 102                                                                    |
| #8  | ((polyangiit* or polyarterit*) near/3 (microscop* or MPA or granulom*)) 277                                                               |
| #9  | wegener* 394                                                                                                                              |
| #10 | (glomerulonephrit* near/3 necrot*) 13                                                                                                     |
| #11 | #1 or #2 or #3 or #4 or #5 or #6 or #7 or #8 or #9 or #10 867                                                                             |
| #12 | MeSH descriptor: [Glucocorticoids] explode all trees 4445                                                                                 |
| #13 | MeSH descriptor: [Prednisolone] explode all trees 4804                                                                                    |
| #14 | MeSH descriptor: [Methylprednisolone] explode all trees 2679                                                                              |
| #15 | MeSH descriptor: [Prednisone] explode all trees 3909                                                                                      |
| #16 | MeSH descriptor: [Adrenal Cortex Hormones] explode all trees 14135                                                                        |
| #17 | corticosteroid* or glucocorticoid* or methylprednisolon* or prednison* or prednisolon* 41757                                              |
| #18 | MeSH descriptor: [Corticosterone] explode all trees 38                                                                                    |
| #19 | MeSH descriptor: [Hydrocortisone] explode all trees 5886                                                                                  |
| #20 | MeSH descriptor: [Cortisone] explode all trees 143                                                                                        |
| #21 | MeSH descriptor: [Steroids] explode all trees 57500                                                                                       |
| #22 | MeSH descriptor: [Cortodoxone] explode all trees 30                                                                                       |
| #23 | MeSH descriptor: [Cortodoxone] explode all trees 30                                                                                       |
| #24 | MeSH descriptor: [Hydroxycorticosteroids] explode all trees 7002                                                                          |
| #25 | MeSH descriptor: [Dexamethasone] explode all trees 4409                                                                                   |

#26 corticosteron\* or hydrocortison or cortison\* or steroids or cortodoxon\* or hydroxycorticosteroid\* or dexamethason\* or adrenocorticosteroid\* or adrenocorticoid\* or corticoid\* 22688

#27 #12 or #13 or #14 or #15 or #16 or #17 or #18 or #19 or #20 or #21 or #22 or #23 or #24 or #25 or #26 95898

#28 #11 and #27 in Trials 377
