# Supplementary material for: Comparative efficacy and safety of alternative glucocorticoids regimens in patients with ANCA-associated vasculitis: a systematic review
Source: PubMed Central journal article supplement — BMJ Open. 2022 Feb 25;12(2):e050507. doi: 10.1136/bmjopen-2021-050507 (PMC8883216; doi:10.1136/bmjopen-2021-050507), 2022-02-25
Supplement: bmjopen-2021-050507supp003.pdf [file bmjopen-2021-050507supp003.pdf]

## Appendix 3 Risk of Bias assessment for outcomes of included RCTs

| Outcomes of Trials             | Sequence generation | Allocation concealment | Blinding (patients) | Blinding (health care providers) | Blinding (outcome assessors) | Blinding (data collectors) | Blinding (data analyst) | Loss to follow-up |
|--------------------------------|---------------------|------------------------|---------------------|----------------------------------|------------------------------|----------------------------|-------------------------|-------------------|
| <b>Walsh et al. 2020</b>       |                     |                        |                     |                                  |                              |                            |                         |                   |
| Death                          | Definitely          | Definitely             | Probably            | Probably                         | Probably                     | Probably                   | Probably                | Definitely        |
|                                | Low                 | Low                    | Low                 | Low                              | Low                          | Low                        | Low                     | Low               |
| ESKD                           | Definitely          | Definitely             | Probably            | Probably                         | Probably                     | Probably                   | Probably                | Definitely        |
|                                | Low                 | Low                    | Low                 | Low                              | Low                          | Low                        | Low                     | Low               |
| Remission                      | Definitely          | Definitely             | Probably            | Probably                         | Probably                     | Probably                   | Probably                | Definitely        |
|                                | Low                 | Low                    | Low                 | Low                              | Low                          | Low                        | Low                     | Low               |
| Serious adverse events         | Definitely          | Definitely             | Probably            | Probably                         | Probably                     | Probably                   | Probably                | Definitely        |
|                                | Low                 | Low                    | Low                 | Low                              | Low                          | Low                        | Low                     | Low               |
| Serious infections             | Definitely          | Definitely             | Probably            | Probably                         | Probably                     | Probably                   | Probably                | Definitely        |
|                                | Low                 | Low                    | Low                 | Low                              | Low                          | Low                        | Low                     | Low               |
| Health-related quality of life | Definitely          | Definitely             | Probably            | Probably                         | Probably                     | Probably                   | Probably                | Definitely        |
|                                | Low                 | Low                    | Low                 | Low                              | Low                          | Low                        | Low                     | Low               |
| <b>Furuta et al. 2021</b>      |                     |                        |                     |                                  |                              |                            |                         |                   |
| Death                          | Definitely          | Definitely             | Probably            | Probably                         | Probably                     | Probably                   | Probably                | Definitely        |
|                                | Low                 | Low                    | Low                 | Low                              | Low                          | Low                        | Low                     | Low               |
| ESKD                           | Definitely          | Definitely             | Probably            | Probably                         | Probably                     | Probably                   | Probably                | Definitely        |
|                                | Low                 | Low                    | Low                 | Low                              | Low                          | Low                        | Low                     | Low               |
| Remission                      | Definitely          | Definitely             | Probably            | Probably                         | Probably                     | Probably                   | Probably                | Definitely        |
|                                | Low                 | Low                    | Low                 | Low                              | Low                          | Low                        | Low                     | Low               |
| Relapse                        | Definitely          | Definitely             | Probably            | Probably                         | Probably                     | Probably                   | Probably                | Definitely        |
|                                | Low                 | Low                    | Low                 | Low                              | Low                          | Low                        | Low                     | Low               |
| Serious adverse events         | Definitely          | Definitely             | Probably            | Probably                         | Probably                     | Probably                   | Probably                | Definitely        |
|                                | Low                 | Low                    | Low                 | Low                              | Low                          | Low                        | Low                     | Low               |
| Serious infections             | Definitely          | Definitely             | Probably            | Probably                         | Probably                     | Probably                   | Probably                | Definitely        |
|                                | Low                 | Low                    | Low                 | Low                              | Low                          | Low                        | Low                     | Low               |
| Health-related quality of life | Definitely          | Definitely             | Probably            | Probably                         | Probably                     | Probably                   | Probably                | Definitely        |
|                                | Low                 | Low                    | Low                 | Low                              | Low                          | Low                        | Low                     | Low               |

ESKD: end-stage kidney disease; RCT: randomized controlled trial.
